# Supplementary material
Source: Research Square preprint supplement (doi:10.21203/rs.3.rs-9444299/v1)
Supplement: Supplementary file 1 [file 3435ad4cc2b20d23757bd8a8.docx]

## **Table of Contents**

This study reveals the dual regulatory role of *Csi*-miR-190-3p in CCA progression: it accelerates cell cycle progression to promote proliferation while suppressing migration and invasion via inhibition of the CXCL5/ERK signaling axis. This discovery provides novel insights into the molecular mechanisms by which *C. sinensis*-derived miRNAs contribute to oncogenic processes in host cells.
