# Supplementary material
Source: Research Square preprint supplement (doi:10.21203/rs.3.rs-9444299/v1)
Supplement: Supplementary file 2 [file b88adb0d416a0177164695eb.xlsx]

## Sheet: S1
S1 Table. Mimic for transfection
	Sequence (5’-3’)
Mature Csi-miR-190-3p	5-AGAUAUGUUUGGGUUACUUGGUG-3
Csi-miR-190-3p mimic	sense (5’-3’)	Antisense (5’-3’)
	AGAUAUGUUUGGGUUACUUGGUG	CACCAAGUAACCCAAACAUAUCU
Csi-miR-190-3p inhibitor	5-CACCAAGUAACCCAAACAUAUCU-3
Scramble-miRNA mimic	NO. miR1N0000002 micrON mimic NC #24

## Sheet: S2
S2 Table. Primer sequences of human genes for RT-qPCR
Genes	Forward (5’-3’)	Reverse (5’-3’)
CXCL5	GCTACCACTTCCACCTTG	CCACTATGAGCCTVVTGT
DENR	GCAAGCACTGGCACTTCTCTG	GTCCATTAGAGTCTCACCAACCAAG
SLC35E3	ACGACAGGTGATCCACCTGC	TATGAACCAACAAATACACC
GAPDH	GTCGCCAGCCGAGCCACATC	CCAGGCGCCCAATACGACCA
The Csi-miR-190-3p and U6 primers were synthesized by RiboBio, and their sequences are confidential as required by the company.

## Sheet: S3
S3 Table. Specifications of primary antibodies
Vendor	Antibody	Source	Catalog no.	Working dilution
Cell Signaling Technology	anti-p-ERK	Rabbit	4370	WB, 1:2000
	anti-ERK	Rabbit	4695	WB, 1:1000
	anti-GAPDH	Rabbit	5174	WB, 1:1000
Affinity Biosciences	anti-CXCL5	Rabbit	9919	WB, 1:1000

## Sheet: S4
	S4 Table. The target genes predicted by TargetScan, miRTarBase, and miRDB.
miRDB								miRTarBase						TargetScan						Intersection target genes
Target Detail	Target Rank	Target Score	miRNA Name	Gene Symbol	Gene Description			ID	Species(miRNA)	Species(Target)	miRNA	Target		Target gene	Representative transcript	Gene name	3P-seq tags + 5			CXCL5
Details	1	100	hsa-miR-190a-3p	SMAD2	SMAD family member 2			MIRT055789	hsa	hsa	hsa-miR-190a-3p	PLEKHA1		HIATL2	ENST00000602917.1	hippocampus abundant transcript-like 2	111			DENR
Details	2	100	hsa-miR-190a-3p	NMT1	N-myristoyltransferase 1			MIRT056036	hsa	hsa	hsa-miR-190a-3p	MLLT10		AP000708.1	ENST00000527818.1		5			SLC35E3
Details	3	100	hsa-miR-190a-3p	TTYH3	tweety family member 3			MIRT059900	hsa	hsa	hsa-miR-190a-3p	HDGF		CXCL5	ENST00000296027.4	chemokine (C-X-C motif) ligand 5	5			VENTX
Details	4	100	hsa-miR-190a-3p	SCN11A	sodium voltage-gated channel alpha subunit 11			MIRT060968	hsa	hsa	hsa-miR-190a-3p	LAMC1		RP11-322L20.1	ENST00000557527.1	HCG2028865; Uncharacterized protein	5			SENP3
Details	5	100	hsa-miR-190a-3p	RAPH1	Ras association (RalGDS/AF-6) and pleckstrin homology domains 1			MIRT061109	hsa	hsa	hsa-miR-190a-3p	CREBZF		GCNT4	ENST00000322348.4	glucosaminyl (N-acetyl) transferase 4, core 2	19			PYHIN1
Details	6	100	hsa-miR-190a-3p	FAM122B	family with sequence similarity 122B			MIRT061650	hsa	hsa	hsa-miR-190a-3p	BTG2		DENR	ENST00000280557.6	density-regulated protein	186			TRPM6
Details	7	100	hsa-miR-190a-3p	HCN1	hyperpolarization activated cyclic nucleotide gated potassium channel 1			MIRT063764	hsa	hsa	hsa-miR-190a-3p	LBR		LRRC63	ENST00000595396.1	leucine rich repeat containing 63	5			KLHL23
Details	8	100	hsa-miR-190a-3p	BAG1	BCL2 associated athanogene 1			MIRT064333	hsa	hsa	hsa-miR-190a-3p	IRF2BP2		CNRIP1	ENST00000409862.1	cannabinoid receptor interacting protein 1	29			WNT11
Details	9	100	hsa-miR-190a-3p	PLAG1	PLAG1 zinc finger			MIRT064648	hsa	hsa	hsa-miR-190a-3p	YAF2		VEGFA	ENST00000417285.2	vascular endothelial growth factor A	907			HHIP
Details	10	100	hsa-miR-190a-3p	HUWE1	HECT, UBA and WWE domain containing 1, E3 ubiquitin protein ligase			MIRT067388	hsa	hsa	hsa-miR-190a-3p	TMTC3		ASB11	ENST00000537676.1	ankyrin repeat and SOCS box containing 11	5			CRADD
Details	11	100	hsa-miR-190a-3p	LZTS3	leucine zipper tumor suppressor family member 3			MIRT068210	hsa	hsa	hsa-miR-190a-3p	RNF6		ACKR3	ENST00000272928.3	atypical chemokine receptor 3	991			WDR17
Details	12	100	hsa-miR-190a-3p	CACNA1G	calcium voltage-gated channel subunit alpha1 G			MIRT069886	hsa	hsa	hsa-miR-190a-3p	BRMS1L		TAF9B	ENST00000341864.5	TAF9B RNA polymerase II, TATA box binding protein (TBP)-associated factor, 31kDa	19			FAM19A1
Details	13	100	hsa-miR-190a-3p	ENSA	endosulfine alpha			MIRT071834	hsa	hsa	hsa-miR-190a-3p	OSBPL9		VENTX	ENST00000325980.9	VENT homeobox	5			TMEM161B
Details	14	100	hsa-miR-190a-3p	FAM19A1	family with sequence similarity 19 member A1, C-C motif chemokine like			MIRT073753	hsa	hsa	hsa-miR-190a-3p	NUBP1		SENP3	ENST00000429205.2	SUMO1/sentrin/SMT3 specific peptidase 3	1262			ASB11
Details	15	100	hsa-miR-190a-3p	ZMYM2	zinc finger MYM-type containing 2			MIRT074035	hsa	hsa	hsa-miR-190a-3p	NFIA		ZNF460	ENST00000360338.3	zinc finger protein 460	164			SERTM1
Details	16	100	hsa-miR-190a-3p	RYBP	RING1 and YY1 binding protein			MIRT074752	hsa	hsa	hsa-miR-190a-3p	N4BP1		MKRN3	ENST00000314520.3	makorin ring finger protein 3	18			PRKCD
Details	17	100	hsa-miR-190a-3p	PBRM1	polybromo 1			MIRT079650	hsa	hsa	hsa-miR-190a-3p	ERRFI1		PYHIN1	ENST00000368140.1	pyrin and HIN domain family, member 1	5			GIMAP7
Details	18	100	hsa-miR-190a-3p	SLC35E3	solute carrier family 35 member E3			MIRT079721	hsa	hsa	hsa-miR-190a-3p	SNRPD1		TRPM6	ENST00000360774.1	transient receptor potential cation channel, subfamily M, member 6	21			HOXD10
Details	19	100	hsa-miR-190a-3p	CBX8	chromobox 8			MIRT079902	hsa	hsa	hsa-miR-190a-3p	B4GALT6		SLC35G2	ENST00000446465.2	solute carrier family 35, member G2	249			PTP4A2
Details	20	100	hsa-miR-190a-3p	DDX6	DEAD-box helicase 6			MIRT081697	hsa	hsa	hsa-miR-190a-3p	ZNF507		MTMR12	ENST00000280285.5	myotubularin related protein 12	156			TNFSF9
Details	21	100	hsa-miR-190a-3p	PTP4A2	protein tyrosine phosphatase type IVA, member 2			MIRT082142	hsa	hsa	hsa-miR-190a-3p	ZNF529		KLHL23	ENST00000392647.2	kelch-like family member 23	791			FKBP14
Details	22	100	hsa-miR-190a-3p	GIMAP7	GTPase, IMAP family member 7			MIRT083936	hsa	hsa	hsa-miR-190a-3p	TFAP2C		KB-1980E6.3	ENST00000523572.1	Uncharacterized protein	5			PIK3R1
Details	23	100	hsa-miR-190a-3p	ZDHHC5	zinc finger DHHC-type containing 5			MIRT084942	hsa	hsa	hsa-miR-190a-3p	BACH1		FBXL4	ENST00000369244.2	F-box and leucine-rich repeat protein 4	321			TBX4
Details	24	100	hsa-miR-190a-3p	PTPRJ	protein tyrosine phosphatase, receptor type J			MIRT087350	hsa	hsa	hsa-miR-190a-3p	PITPNB		WNT11	ENST00000322563.3	wingless-type MMTV integration site family, member 11	59			CYGB
Details	25	100	hsa-miR-190a-3p	NCSTN	nicastrin			MIRT093987	hsa	hsa	hsa-miR-190a-3p	SLAIN2		PI15	ENST00000260113.2	peptidase inhibitor 15	12			MYADM
Details	26	100	hsa-miR-190a-3p	ZC3H6	zinc finger CCCH-type containing 6			MIRT094804	hsa	hsa	hsa-miR-190a-3p	LMNB1		SMCO1	ENST00000397537.2	single-pass membrane protein with coiled-coil domains 1	5			INSIG2
Details	27	100	hsa-miR-190a-3p	BTAF1	B-TFIID TATA-box binding protein associated factor 1			MIRT097119	hsa	hsa	hsa-miR-190a-3p	TNPO1		HHIP	ENST00000296575.3	hedgehog interacting protein	65			DHX36
Details	28	100	hsa-miR-190a-3p	L3MBTL3	L3MBTL3, histone methyl-lysine binding protein			MIRT097759	hsa	hsa	hsa-miR-190a-3p	ARSK		AC132872.2	ENST00000598222.1	CDNA FLJ27256 fis, clone SYN09689; Uncharacterized protein	24			HOXC4
Details	29	100	hsa-miR-190a-3p	HIPK3	homeodomain interacting protein kinase 3			MIRT097918	hsa	hsa	hsa-miR-190a-3p	HACE1		NDUFB3	ENST00000237889.4	NADH dehydrogenase (ubiquinone) 1 beta subcomplex, 3, 12kDa	1247			PRRX1
Details	30	100	hsa-miR-190a-3p	GRIA4	glutamate ionotropic receptor AMPA type subunit 4			MIRT099577	hsa	hsa	hsa-miR-190a-3p	ID4		CRADD	ENST00000542893.2	CASP2 and RIPK1 domain containing adaptor with death domain	207			AJAP1
Details	31	100	hsa-miR-190a-3p	PIAS2	protein inhibitor of activated STAT 2			MIRT100856	hsa	hsa	hsa-miR-190a-3p	CD2AP		C5orf58	ENST00000593851.1	chromosome 5 open reading frame 58	5			PCDH10
Details	32	100	hsa-miR-190a-3p	MSR1	macrophage scavenger receptor 1			MIRT102504	hsa	hsa	hsa-miR-190a-3p	KLHDC10		CCL8	ENST00000394620.1	chemokine (C-C motif) ligand 8	5			ZIC5
Details	33	100	hsa-miR-190a-3p	MBTD1	mbt domain containing 1			MIRT112592	hsa	hsa	hsa-miR-190a-3p	SPPL3		WDR17	ENST00000393643.2	WD repeat domain 17	113			ARHGEF11
Details	34	100	hsa-miR-190a-3p	ZNF441	zinc finger protein 441			MIRT112682	hsa	hsa	hsa-miR-190a-3p	DENR		FAM19A1	ENST00000478136.1	family with sequence similarity 19 (chemokine (C-C motif)-like), member A1	5			RSBN1L
Details	35	100	hsa-miR-190a-3p	CBX3	chromobox 3			MIRT116201	hsa	hsa	hsa-miR-190a-3p	NUFIP2		TMEM161B	ENST00000506536.1	transmembrane protein 161B	14			ARID3A
Details	36	100	hsa-miR-190a-3p	PPARGC1A	PPARG coactivator 1 alpha			MIRT116236	hsa	hsa	hsa-miR-190a-3p	TAOK1		MAST4	ENST00000406374.1	microtubule associated serine/threonine kinase family member 4	72			SYP
Details	37	100	hsa-miR-190a-3p	IMPG2	interphotoreceptor matrix proteoglycan 2			MIRT117876	hsa	hsa	hsa-miR-190a-3p	ZBTB7A		SLC35E3	ENST00000398004.2	solute carrier family 35, member E3	250			HMGN3
Details	38	100	hsa-miR-190a-3p	CSMD1	CUB and Sushi multiple domains 1			MIRT118200	hsa	hsa	hsa-miR-190a-3p	KHSRP		CXCL12	ENST00000343575.6	chemokine (C-X-C motif) ligand 12	719			ZC3H6
Details	39	100	hsa-miR-190a-3p	CREBRF	CREB3 regulatory factor			MIRT120269	hsa	hsa	hsa-miR-190a-3p	GSK3B		SERTM1	ENST00000315190.3	serine-rich and transmembrane domain containing 1	12			RPL23A
Details	40	100	hsa-miR-190a-3p	STAG2	stromal antigen 2			MIRT122942	hsa	hsa	hsa-miR-190a-3p	ZNF318		PRKCD	ENST00000394729.2	protein kinase C, delta	2225			WASL
Details	41	100	hsa-miR-190a-3p	WASL	Wiskott-Aldrich syndrome like			MIRT124869	hsa	hsa	hsa-miR-190a-3p	ACSL4		MCEE	ENST00000244217.5	methylmalonyl CoA epimerase	34			PMEPA1
Details	42	100	hsa-miR-190a-3p	FKBP5	FKBP prolyl isomerase 5			MIRT135005	hsa	hsa	hsa-miR-190a-3p	ZBTB18		ANKRD30B	ENST00000358984.4	ankyrin repeat domain 30B	0			SLC24A2
Details	43	100	hsa-miR-190a-3p	ELF2	E74 like ETS transcription factor 2			MIRT141027	hsa	hsa	hsa-miR-190a-3p	NPTN		KIF27	ENST00000297814.2	kinesin family member 27	18			AKAP10
Details	44	100	hsa-miR-190a-3p	SP1	Sp1 transcription factor			MIRT144806	hsa	hsa	hsa-miR-190a-3p	RAI1		MEI4	ENST00000602452.2	meiosis-specific 4 homolog (S. cerevisiae)	5			ZBTB18
Details	45	100	hsa-miR-190a-3p	RC3H2	ring finger and CCCH-type domains 2			MIRT149858	hsa	hsa	hsa-miR-190a-3p	LDLR		TMPRSS11B	ENST00000332644.5	transmembrane protease, serine 11B	5			SRP72
Details	46	100	hsa-miR-190a-3p	DTX4	deltex E3 ubiquitin ligase 4			MIRT163346	hsa	hsa	hsa-miR-190a-3p	PRKCD		PPP1R1C	ENST00000409137.3	protein phosphatase 1, regulatory (inhibitor) subunit 1C	5			IGFBP1
Details	47	100	hsa-miR-190a-3p	SENP1	SUMO specific peptidase 1			MIRT163408	hsa	hsa	hsa-miR-190a-3p	WNT5A		LRRIQ3	ENST00000395089.1	leucine-rich repeats and IQ motif containing 3	5			CYP4F11
Details	48	100	hsa-miR-190a-3p	SMAD9	SMAD family member 9			MIRT177361	hsa	hsa	hsa-miR-190a-3p	ACBD5		GIMAP7	ENST00000313543.4	GTPase, IMAP family member 7	5			ZER1
Details	49	100	hsa-miR-190a-3p	PLEKHM3	pleckstrin homology domain containing M3			MIRT177374	hsa	hsa	hsa-miR-190a-3p	RAB18		HOXD10	ENST00000249501.4	homeobox D10	182			DDX55
Details	50	100	hsa-miR-190a-3p	PPP1R1A	protein phosphatase 1 regulatory inhibitor subunit 1A			MIRT182287	hsa	hsa	hsa-miR-190a-3p	POU2F1		CBX3	ENST00000409747.1	chromobox homolog 3	889			PLCXD1
Details	51	100	hsa-miR-190a-3p	PIK3CG	phosphatidylinositol-4,5-bisphosphate 3-kinase catalytic subunit gamma			MIRT183578	hsa	hsa	hsa-miR-190a-3p	ATP2B4		PTP4A2	ENST00000602725.1	protein tyrosine phosphatase type IVA, member 2	5			PRIMA1
Details	52	100	hsa-miR-190a-3p	INSYN1	inhibitory synaptic factor 1			MIRT187051	hsa	hsa	hsa-miR-190a-3p	LIMA1		TNFSF9	ENST00000245817.3	tumor necrosis factor (ligand) superfamily, member 9	30			REEP3
Details	53	100	hsa-miR-190a-3p	PRKD3	protein kinase D3			MIRT193651	hsa	hsa	hsa-miR-190a-3p	RORA		HORMAD1	ENST00000368995.4	HORMA domain containing 1	153			SEMA3F
Details	54	100	hsa-miR-190a-3p	NCK2	NCK adaptor protein 2			MIRT194394	hsa	hsa	hsa-miR-190a-3p	HOOK1		FKBP14	ENST00000222803.5	FK506 binding protein 14, 22 kDa	939			ADH1B
Details	55	100	hsa-miR-190a-3p	CALHM5	calcium homeostasis modulator family member 5			MIRT197078	hsa	hsa	hsa-miR-190a-3p	RAB5C		HSD17B7	ENST00000367917.3	hydroxysteroid (17-beta) dehydrogenase 7	5			KCNN3
Details	56	100	hsa-miR-190a-3p	MTMR12	myotubularin related protein 12			MIRT198841	hsa	hsa	hsa-miR-190a-3p	C18ORF25		C18orf63	ENST00000579455.1	chromosome 18 open reading frame 63	5			GRAMD1B
Details	57	100	hsa-miR-190a-3p	ARID3A	AT-rich interaction domain 3A			MIRT202547	hsa	hsa	hsa-miR-190a-3p	ZNF512B		PIK3R1	ENST00000521381.1	phosphoinositide-3-kinase, regulatory subunit 1 (alpha)	217			RTN4RL1
Details	58	100	hsa-miR-190a-3p	DHX40	DEAH-box helicase 40			MIRT203961	hsa	hsa	hsa-miR-190a-3p	SSB		SPACA4	ENST00000321762.1	sperm acrosome associated 4	5			ALG10B
Details	59	100	hsa-miR-190a-3p	NLK	nemo like kinase			MIRT205681	hsa	hsa	hsa-miR-190a-3p	HMGXB4		FAM26E	ENST00000368599.3	family with sequence similarity 26, member E	32			SHOX2
Details	60	100	hsa-miR-190a-3p	CFAP97	cilia and flagella associated protein 97			MIRT211885	hsa	hsa	hsa-miR-190a-3p	CPEB2		KLHDC1	ENST00000359332.2	kelch domain containing 1	5			ROCK2
Details	61	100	hsa-miR-190a-3p	BMP2	bone morphogenetic protein 2			MIRT212831	hsa	hsa	hsa-miR-190a-3p	UBE2K		TBX4	ENST00000393853.4	T-box 4	21			DEGS1
Details	62	100	hsa-miR-190a-3p	ZBTB7A	zinc finger and BTB domain containing 7A			MIRT213234	hsa	hsa	hsa-miR-190a-3p	REST		IL1RAPL1	ENST00000378993.1	interleukin 1 receptor accessory protein-like 1	5			EVI5
Details	63	100	hsa-miR-190a-3p	NAA40	N(alpha)-acetyltransferase 40, NatD catalytic subunit			MIRT213823	hsa	hsa	hsa-miR-190a-3p	SMARCAD1		TCEAL1	ENST00000372625.3	transcription elongation factor A (SII)-like 1	23			MAP3K12
Details	64	100	hsa-miR-190a-3p	CNTNAP5	contactin associated protein like 5			MIRT215958	hsa	hsa	hsa-miR-190a-3p	IL6ST		CYGB	ENST00000293230.5	cytoglobin	10			BMP2
Details	65	100	hsa-miR-190a-3p	TMTC1	transmembrane and tetratricopeptide repeat containing 1			MIRT225123	hsa	hsa	hsa-miR-190a-3p	KAT6A		AC107021.1	ENST00000422482.1	HCG1786590; PRO2533; Uncharacterized protein	5			KCNJ3
Details	66	100	hsa-miR-190a-3p	CEP97	centrosomal protein 97			MIRT232415	hsa	hsa	hsa-miR-190a-3p	SP1		BCL6	ENST00000406870.2	B-cell CLL/lymphoma 6	20			NRF1
Details	67	100	hsa-miR-190a-3p	DYNC1LI1	dynein cytoplasmic 1 light intermediate chain 1			MIRT240604	hsa	hsa	hsa-miR-190a-3p	AKAP2		INO80D	ENST00000403263.1	INO80 complex subunit D	5			NUBP1
Details	68	100	hsa-miR-190a-3p	EPHA5	EPH receptor A5			MIRT240610	hsa	hsa	hsa-miR-190a-3p	PALM2-AKAP2		F9	ENST00000218099.2	coagulation factor IX	5			IGF1
Details	69	100	hsa-miR-190a-3p	NDST1	N-deacetylase and N-sulfotransferase 1			MIRT244053	hsa	hsa	hsa-miR-190a-3p	ASF1A		MYADM	ENST00000391770.4	myeloid-associated differentiation marker	3436			NLRP8
Details	70	100	hsa-miR-190a-3p	PTER	phosphotriesterase related			MIRT255968	hsa	hsa	hsa-miR-190a-3p	WDR17		SGPP1	ENST00000247225.6	sphingosine-1-phosphate phosphatase 1	1340			GTPBP2
Details	71	100	hsa-miR-190a-3p	PWWP2A	PWWP domain containing 2A			MIRT261398	hsa	hsa	hsa-miR-190a-3p	USP6NL		DOK6	ENST00000382713.5	docking protein 6	8			RBM23
Details	72	100	hsa-miR-190a-3p	PTPRD	protein tyrosine phosphatase, receptor type D			MIRT262929	hsa	hsa	hsa-miR-190a-3p	ARID5B		HIST1H2BC	ENST00000314332.5	histone cluster 1, H2bc	13			HACE1
Details	73	100	hsa-miR-190a-3p	SLC25A27	solute carrier family 25 member 27			MIRT265243	hsa	hsa	hsa-miR-190a-3p	SLC16A1		LYRM7	ENST00000507584.1	LYR motif containing 7	217			C2orf49
Details	74	100	hsa-miR-190a-3p	TGFBR2	transforming growth factor beta receptor 2			MIRT267007	hsa	hsa	hsa-miR-190a-3p	ZDHHC5		TCF7L2	ENST00000369386.1	transcription factor 7-like 2 (T-cell specific, HMG-box)	650			CCL11
Details	75	100	hsa-miR-190a-3p	TSPAN2	tetraspanin 2			MIRT267557	hsa	hsa	hsa-miR-190a-3p	UHMK1		EMC2	ENST00000220853.3	ER membrane protein complex subunit 2	756			KPNA4
Details	76	100	hsa-miR-190a-3p	ROCK2	Rho associated coiled-coil containing protein kinase 2			MIRT270183	hsa	hsa	hsa-miR-190a-3p	UNG		TBC1D19	ENST00000264866.4	TBC1 domain family, member 19	77			STRN
Details	77	100	hsa-miR-190a-3p	RIT1	Ras like without CAAX 1			MIRT271520	hsa	hsa	hsa-miR-190a-3p	DEGS1		EXOSC9	ENST00000512454.1	exosome component 9	733			MBNL3
Details	78	100	hsa-miR-190a-3p	DNMT3A	DNA methyltransferase 3 alpha			MIRT274336	hsa	hsa	hsa-miR-190a-3p	XPOT		PTF1A	ENST00000376504.3	pancreas specific transcription factor, 1a	5			CREBZF
Details	79	100	hsa-miR-190a-3p	KDM2A	lysine demethylase 2A			MIRT275649	hsa	hsa	hsa-miR-190a-3p	ABHD13		SCOC	ENST00000608372.1	short coiled-coil protein	922			MCAM
Details	80	100	hsa-miR-190a-3p	TENT5A	terminal nucleotidyltransferase 5A			MIRT277059	hsa	hsa	hsa-miR-190a-3p	NDFIP2		INSIG2	ENST00000245787.4	insulin induced gene 2	562			NRIP1
Details	81	100	hsa-miR-190a-3p	PRRC2C	proline rich coiled-coil 2C			MIRT277144	hsa	hsa	hsa-miR-190a-3p	MTF1		UBE2U	ENST00000371076.3	ubiquitin-conjugating enzyme E2U (putative)	5			NPTN
Details	82	100	hsa-miR-190a-3p	PUM1	pumilio RNA binding family member 1			MIRT277902	hsa	hsa	hsa-miR-190a-3p	RBM23		SMIM18	ENST00000517349.1	small integral membrane protein 18	5			XKR6
Details	83	100	hsa-miR-190a-3p	DLX3	distal-less homeobox 3			MIRT282600	hsa	hsa	hsa-miR-190a-3p	IGF1R		CABP7	ENST00000216144.3	calcium binding protein 7	12			SUCNR1
Details	84	100	hsa-miR-190a-3p	PRAG1	PEAK1 related, kinase-activating pseudokinase 1			MIRT284243	hsa	hsa	hsa-miR-190a-3p	PAPD5		RGR	ENST00000359452.4	retinal G protein coupled receptor	5			TAGLN2
Details	85	100	hsa-miR-190a-3p	CNOT6L	CCR4-NOT transcription complex subunit 6 like			MIRT286304	hsa	hsa	hsa-miR-190a-3p	RPL23A		AC016722.1	ENST00000409518.1	Uncharacterized protein	5			FBXO9
Details	86	100	hsa-miR-190a-3p	DHX36	DEAH-box helicase 36			MIRT290929	hsa	hsa	hsa-miR-190a-3p	PMAIP1		DHX36	ENST00000496811.1	DEAH (Asp-Glu-Ala-His) box polypeptide 36	108			RABGAP1
Details	87	100	hsa-miR-190a-3p	IKZF2	IKAROS family zinc finger 2			MIRT294437	hsa	hsa	hsa-miR-190a-3p	ZNF264		IFT27	ENST00000340630.5	intraflagellar transport 27 homolog (Chlamydomonas)	125			CREBRF
Details	88	100	hsa-miR-190a-3p	BCORL1	BCL6 corepressor like 1			MIRT296489	hsa	hsa	hsa-miR-190a-3p	PMEPA1		IRAK1BP1	ENST00000369940.2	interleukin-1 receptor-associated kinase 1 binding protein 1	30			MBTD1
Details	89	100	hsa-miR-190a-3p	AJAP1	adherens junctions associated protein 1			MIRT297064	hsa	hsa	hsa-miR-190a-3p	NCK2		FGF18	ENST00000274625.5	fibroblast growth factor 18	5			OSBP2
Details	90	100	hsa-miR-190a-3p	CAPN5	calpain 5			MIRT297516	hsa	hsa	hsa-miR-190a-3p	INSIG2		HOXC4	ENST00000430889.2	Homeobox protein Hox-C4	508			ZNF608
Details	91	100	hsa-miR-190a-3p	SPATA2	spermatogenesis associated 2			MIRT298181	hsa	hsa	hsa-miR-190a-3p	IFNAR1		ST7-OT4	ENST00000397750.3	ST7 overlapping transcript 4	5			KIAA1109
Details	92	100	hsa-miR-190a-3p	CSRNP3	cysteine and serine rich nuclear protein 3			MIRT300271	hsa	hsa	hsa-miR-190a-3p	PLEKHM3		HK3	ENST00000292432.5	hexokinase 3 (white cell)	5			RBBP9
Details	93	100	hsa-miR-190a-3p	PHOSPHO2-KLHL23	PHOSPHO2-KLHL23 readthrough			MIRT302616	hsa	hsa	hsa-miR-190a-3p	CRIM1		SNCA	ENST00000394989.2	synuclein, alpha (non A4 component of amyloid precursor)	476			GTF2H1
Details	94	100	hsa-miR-190a-3p	PI15	peptidase inhibitor 15			MIRT302693	hsa	hsa	hsa-miR-190a-3p	PRKD3		TCF21	ENST00000367882.4	transcription factor 21	552			VGLL2
Details	95	100	hsa-miR-190a-3p	TMEM108	transmembrane protein 108			MIRT307895	hsa	hsa	hsa-miR-190a-3p	DUSP7		DEPDC1	ENST00000456315.2	DEP domain containing 1	1068			PCGF2
Details	96	100	hsa-miR-190a-3p	ATP8B2	ATPase phospholipid transporting 8B2			MIRT311191	hsa	hsa	hsa-miR-190a-3p	ANKRD33B		PRRX1	ENST00000367760.3	paired related homeobox 1	57			PLAG1
Details	97	100	hsa-miR-190a-3p	RAB3B	RAB3B, member RAS oncogene family			MIRT312939	hsa	hsa	hsa-miR-190a-3p	CREBRF		MARCH7	ENST00000259050.4	membrane-associated ring finger (C3HC4) 7, E3 ubiquitin protein ligase	537			FAM47E-STBD1
Details	98	100	hsa-miR-190a-3p	GRID1	glutamate ionotropic receptor delta type subunit 1			MIRT313988	hsa	hsa	hsa-miR-190a-3p	TPPP		ACR	ENST00000216139.5	acrosin	5			KRT222
Details	99	100	hsa-miR-190a-3p	MBNL3	muscleblind like splicing regulator 3			MIRT314099	hsa	hsa	hsa-miR-190a-3p	PIK3R1		MS4A7	ENST00000358246.1	membrane-spanning 4-domains, subfamily A, member 7	5			SLC25A27
Details	100	100	hsa-miR-190a-3p	NFIC	nuclear factor I C			MIRT320498	hsa	hsa	hsa-miR-190a-3p	HOXA11		GPN3	ENST00000228827.3	GPN-loop GTPase 3	1825			RNF6
Details	101	100	hsa-miR-190a-3p	RPL23A	ribosomal protein L23a			MIRT325259	hsa	hsa	hsa-miR-190a-3p	PTPRD		TMEM133	ENST00000303130.2	transmembrane protein 133	543			RAB11FIP3
Details	102	100	hsa-miR-190a-3p	KIAA0100	KIAA0100			MIRT325473	hsa	hsa	hsa-miR-190a-3p	FAM120AOS		AJAP1	ENST00000378191.4	adherens junctions associated protein 1	5			CSRNP3
Details	103	100	hsa-miR-190a-3p	ACKR3	atypical chemokine receptor 3			MIRT328405	hsa	hsa	hsa-miR-190a-3p	ARL8A		PCDH10	ENST00000264360.5	protocadherin 10	9			IMPG2
Details	104	100	hsa-miR-190a-3p	RAI1	retinoic acid induced 1			MIRT328925	hsa	hsa	hsa-miR-190a-3p	GTF2B		C10orf107	ENST00000330194.2	chromosome 10 open reading frame 107	6			TSNARE1
Details	105	100	hsa-miR-190a-3p	RSPRY1	ring finger and SPRY domain containing 1			MIRT329165	hsa	hsa	hsa-miR-190a-3p	SERTAD2		FABP2	ENST00000274024.3	fatty acid binding protein 2, intestinal	5			PPP4R2
Details	106	100	hsa-miR-190a-3p	DGKG	diacylglycerol kinase gamma			MIRT329265	hsa	hsa	hsa-miR-190a-3p	ANXA5		LPCAT4	ENST00000314891.6	lysophosphatidylcholine acyltransferase 4	346			NCAM2
Details	107	100	hsa-miR-190a-3p	PHIP	pleckstrin homology domain interacting protein			MIRT330702	hsa	hsa	hsa-miR-190a-3p	REEP3		MYF5	ENST00000228644.3	myogenic factor 5	5			C10orf67
Details	108	100	hsa-miR-190a-3p	ARHGAP21	Rho GTPase activating protein 21			MIRT331629	hsa	hsa	hsa-miR-190a-3p	AASDHPPT		ZIC5	ENST00000267294.4	Zic family member 5	263			PHACTR2
Details	109	100	hsa-miR-190a-3p	WDR17	WD repeat domain 17			MIRT338331	hsa	hsa	hsa-miR-190a-3p	IKZF4		ARHGEF11	ENST00000368194.3	Rho guanine nucleotide exchange factor (GEF) 11	346			MPP6
Details	110	100	hsa-miR-190a-3p	CD200	CD200 molecule			MIRT350726	hsa	hsa	hsa-miR-190a-3p	HSPA13		PRNP	ENST00000379440.4	prion protein	1136			RC3H1
Details	111	100	hsa-miR-190a-3p	NR4A3	nuclear receptor subfamily 4 group A member 3			MIRT359183	hsa	hsa	hsa-miR-190a-3p	F2RL1		RSBN1L	ENST00000334955.8	round spermatid basic protein 1-like	640			NUFIP2
Details	112	100	hsa-miR-190a-3p	GPATCH11	G-patch domain containing 11			MIRT360928	hsa	hsa	hsa-miR-190a-3p	GTPBP2		ARID3A	ENST00000263620.3	AT rich interactive domain 3A (BRIGHT-like)	320			KLF7
Details	113	100	hsa-miR-190a-3p	IRX2	iroquois homeobox 2			MIRT364958	hsa	hsa	hsa-miR-190a-3p	NFIB		C15orf59	ENST00000569673.1	chromosome 15 open reading frame 59	5			PPP1R2
Details	114	100	hsa-miR-190a-3p	TET2	tet methylcytosine dioxygenase 2			MIRT442541	hsa	hsa	hsa-miR-190a-3p	ARHGAP29		SYP	ENST00000263233.4	synaptophysin	15			PPP1R1A
Details	115	100	hsa-miR-190a-3p	PAPPA	pappalysin 1			MIRT442603	hsa	hsa	hsa-miR-190a-3p	TMX4		LRRC23	ENST00000433346.1	leucine rich repeat containing 23	202			BTG2
Details	116	100	hsa-miR-190a-3p	PLEKHA6	pleckstrin homology domain containing A6			MIRT445149	hsa	hsa	hsa-miR-190a-3p	KLHL23		HMGN3	ENST00000275036.7	high mobility group nucleosomal binding domain 3	2124			GPATCH11
Details	117	100	hsa-miR-190a-3p	SPRY3	sprouty RTK signaling antagonist 3			MIRT445440	hsa	hsa	hsa-miR-190a-3p	HSPA14		ZC3H6	ENST00000343936.4	zinc finger CCCH-type containing 6	10			XPOT
Details	118	100	hsa-miR-190a-3p	NRF1	nuclear respiratory factor 1			MIRT445774	hsa	hsa	hsa-miR-190a-3p	TMEM164		RPL23A	ENST00000422514.2	ribosomal protein L23a	13			STARD8
Details	119	100	hsa-miR-190a-3p	UNK	unk zinc finger			MIRT447432	hsa	hsa	hsa-miR-190a-3p	FER		PKIA	ENST00000396418.2	protein kinase (cAMP-dependent, catalytic) inhibitor alpha	542			MYBL1
Details	120	100	hsa-miR-190a-3p	FGF18	fibroblast growth factor 18			MIRT449130	hsa	hsa	hsa-miR-190a-3p	TRAF6		MOB1B	ENST00000309395.2	MOB kinase activator 1B	54			EPHA1
Details	121	100	hsa-miR-190a-3p	DMRTA2	DMRT like family A2			MIRT449289	hsa	hsa	hsa-miR-190a-3p	GMNC		WASL	ENST00000223023.4	Wiskott-Aldrich syndrome-like	230			ARL8A
Details	122	100	hsa-miR-190a-3p	GRAMD1B	GRAM domain containing 1B			MIRT450009	hsa	hsa	hsa-miR-190a-3p	SLC16A6		NTF3	ENST00000423158.3	neurotrophin 3	154			NEGR1
Details	123	100	hsa-miR-190a-3p	ZBTB18	zinc finger and BTB domain containing 18			MIRT466333	hsa	hsa	hsa-miR-190a-3p	THBS1		PMEPA1	ENST00000341744.3	prostate transmembrane protein, androgen induced 1	736			APIP
Details	124	100	hsa-miR-190a-3p	SRP72	signal recognition particle 72			MIRT466941	hsa	hsa	hsa-miR-190a-3p	STAU1		PPIL4	ENST00000340881.2	peptidylprolyl isomerase (cyclophilin)-like 4	1565			NCK2
Details	125	100	hsa-miR-190a-3p	SUCNR1	succinate receptor 1			MIRT470517	hsa	hsa	hsa-miR-190a-3p	PPP1CC		TRIM61	ENST00000329314.5	tripartite motif containing 61	5			TBX18
Details	126	100	hsa-miR-190a-3p	NFIB	nuclear factor I B			MIRT471454	hsa	hsa	hsa-miR-190a-3p	PDHX		SLC24A2	ENST00000341998.2	solute carrier family 24 (sodium/potassium/calcium exchanger), member 2	5			APOOL
Details	127	100	hsa-miR-190a-3p	SPEN	spen family transcriptional repressor			MIRT474052	hsa	hsa	hsa-miR-190a-3p	LMNB2		AKAP10	ENST00000225737.6	A kinase (PRKA) anchor protein 10	700			AMER1
Details	128	100	hsa-miR-190a-3p	HOOK1	hook microtubule tethering protein 1			MIRT479638	hsa	hsa	hsa-miR-190a-3p	CD81		ZBTB18	ENST00000358704.4	zinc finger and BTB domain containing 18	935			AP1AR
Details	129	100	hsa-miR-190a-3p	KIF3C	kinesin family member 3C			MIRT491492	hsa	hsa	hsa-miR-190a-3p	PTK7		SRP72	ENST00000342756.5	signal recognition particle 72kDa	185			KLF6
Details	130	100	hsa-miR-190a-3p	SPRED1	sprouty related EVH1 domain containing 1			MIRT493330	hsa	hsa	hsa-miR-190a-3p	LAPTM4A		LRRC58	ENST00000295628.3	leucine rich repeat containing 58	940			SPRED1
Details	131	100	hsa-miR-190a-3p	STRN	striatin			MIRT499301	hsa	hsa	hsa-miR-190a-3p	KCNK1		IGFBP1	ENST00000275525.3	insulin-like growth factor binding protein 1	17			SPSB1
Details	132	100	hsa-miR-190a-3p	45357	membrane associated ring-CH-type finger 6			MIRT502158	hsa	hsa	hsa-miR-190a-3p	KIAA1109		TMEM218	ENST00000532156.1	transmembrane protein 218	553			UNG
Details	133	100	hsa-miR-190a-3p	ALCAM	activated leukocyte cell adhesion molecule			MIRT503234	hsa	hsa	hsa-miR-190a-3p	KCNJ6		ADCY8	ENST00000286355.5	adenylate cyclase 8 (brain)	5			ELF2
Details	134	100	hsa-miR-190a-3p	ERC1	ELKS/RAB6-interacting/CAST family member 1			MIRT503291	hsa	hsa	hsa-miR-190a-3p	XRCC3		SGK223	ENST00000330777.4	Tyrosine-protein kinase SgK223	159			GSR
Details	135	100	hsa-miR-190a-3p	SNCA	synuclein alpha			MIRT503325	hsa	hsa	hsa-miR-190a-3p	SOX5		INPP5A	ENST00000368594.3	inositol polyphosphate-5-phosphatase, 40kDa	243			CNTNAP5
Details	136	100	hsa-miR-190a-3p	CYGB	cytoglobin			MIRT503332	hsa	hsa	hsa-miR-190a-3p	TET2		CENPK	ENST00000514814.1	centromere protein K	212			HOOK1
Details	137	100	hsa-miR-190a-3p	SMCHD1	structural maintenance of chromosomes flexible hinge domain containing 1			MIRT503387	hsa	hsa	hsa-miR-190a-3p	ASB11		IL4	ENST00000231449.2	interleukin 4	5			OTX1
Details	138	100	hsa-miR-190a-3p	SMAD6	SMAD family member 6			MIRT503401	hsa	hsa	hsa-miR-190a-3p	C11orf74		CYP4F11	ENST00000326742.8	cytochrome P450, family 4, subfamily F, polypeptide 11	8			PHIP
Details	139	100	hsa-miR-190a-3p	FBXO9	F-box protein 9			MIRT503513	hsa	hsa	hsa-miR-190a-3p	USP51		NPPC	ENST00000409852.1	natriuretic peptide C	9			OSBPL9
Details	140	100	hsa-miR-190a-3p	ZNF609	zinc finger protein 609			MIRT503576	hsa	hsa	hsa-miR-190a-3p	BTBD19		PAK1IP1	ENST00000379568.3	PAK1 interacting protein 1	135			PITPNB
Details	141	100	hsa-miR-190a-3p	SVIL	supervillin			MIRT503699	hsa	hsa	hsa-miR-190a-3p	CTLA4		ZBED3	ENST00000255198.2	zinc finger, BED-type containing 3	399			DCAF4L1
Details	142	100	hsa-miR-190a-3p	LARP1	La ribonucleoprotein domain family member 1			MIRT503740	hsa	hsa	hsa-miR-190a-3p	GPATCH11		CCDC38	ENST00000546386.1	coiled-coil domain containing 38	10			GRIN2B
Details	143	100	hsa-miR-190a-3p	KAT6A	lysine acetyltransferase 6A			MIRT503814	hsa	hsa	hsa-miR-190a-3p	CARF		ZER1	ENST00000291900.2	zyg-11 related, cell cycle regulator	336			SAMD12
Details	144	100	hsa-miR-190a-3p	STARD8	StAR related lipid transfer domain containing 8			MIRT503837	hsa	hsa	hsa-miR-190a-3p	NCAM2		TPK1	ENST00000549981.1	thiamin pyrophosphokinase 1	7			CD2AP
Details	145	100	hsa-miR-190a-3p	ZNF384	zinc finger protein 384			MIRT503850	hsa	hsa	hsa-miR-190a-3p	CSMD1		SULT1B1	ENST00000310613.3	sulfotransferase family, cytosolic, 1B, member 1	5			HMGXB4
Details	146	100	hsa-miR-190a-3p	TIMM10	translocase of inner mitochondrial membrane 10			MIRT503858	hsa	hsa	hsa-miR-190a-3p	UBXN2B		FRRS1	ENST00000287474.5	ferric-chelate reductase 1	97			CLVS2
Details	147	100	hsa-miR-190a-3p	DDX55	DEAD-box helicase 55			MIRT503894	hsa	hsa	hsa-miR-190a-3p	ELF2		UGT2A2	ENST00000457664.2	UDP glucuronosyltransferase 2 family, polypeptide A2	5			SP1
Details	148	100	hsa-miR-190a-3p	CYP4F11	cytochrome P450 family 4 subfamily F member 11			MIRT503977	hsa	hsa	hsa-miR-190a-3p	C4orf29		MAP3K13	ENST00000448876.1	mitogen-activated protein kinase kinase kinase 13	226			PAPPA
Details	149	100	hsa-miR-190a-3p	HMGXB4	HMG-box containing 4			MIRT504026	hsa	hsa	hsa-miR-190a-3p	CEP104		EREG	ENST00000244869.2	epiregulin	5			PLXDC2
Details	150	100	hsa-miR-190a-3p	FGFR3	fibroblast growth factor receptor 3			MIRT504135	hsa	hsa	hsa-miR-190a-3p	RAB3B		TFPI2	ENST00000222543.5	tissue factor pathway inhibitor 2	11151			ANXA5
Details	151	100	hsa-miR-190a-3p	BCL9L	BCL9 like			MIRT504252	hsa	hsa	hsa-miR-190a-3p	ADAMTS4		ANGPTL5	ENST00000334289.3	angiopoietin-like 5	5			BRMS1L
Details	152	100	hsa-miR-190a-3p	PCBP2	poly(rC) binding protein 2			MIRT504310	hsa	hsa	hsa-miR-190a-3p	LHFPL5		PPA2	ENST00000341695.5	pyrophosphatase (inorganic) 2	960			TET2
Details	153	100	hsa-miR-190a-3p	WNT3	Wnt family member 3			MIRT504344	hsa	hsa	hsa-miR-190a-3p	COPS8		TPTE2	ENST00000382978.1	transmembrane phosphoinositide 3-phosphatase and tensin homolog 2	5			BACH2
Details	154	100	hsa-miR-190a-3p	INPP5A	inositol polyphosphate-5-phosphatase A			MIRT504354	hsa	hsa	hsa-miR-190a-3p	VCAM1		PTGER3	ENST00000370924.4	prostaglandin E receptor 3 (subtype EP3)	14			BVES
Details	155	100	hsa-miR-190a-3p	CACNB2	calcium voltage-gated channel auxiliary subunit beta 2			MIRT504387	hsa	hsa	hsa-miR-190a-3p	SLC24A2		HSD11B1	ENST00000367028.2	hydroxysteroid (11-beta) dehydrogenase 1	61			RORA
Details	156	100	hsa-miR-190a-3p	MAP3K12	mitogen-activated protein kinase kinase kinase 12			MIRT504456	hsa	hsa	hsa-miR-190a-3p	MIPOL1		TEC	ENST00000381501.3	tec protein tyrosine kinase	11			PPARGC1A
Details	157	100	hsa-miR-190a-3p	VPS13C	vacuolar protein sorting 13 homolog C			MIRT504523	hsa	hsa	hsa-miR-190a-3p	BVES		GADL1	ENST00000282538.5	glutamate decarboxylase-like 1	5			ITPRIPL2
Details	158	100	hsa-miR-190a-3p	SENP3	SUMO specific peptidase 3			MIRT504578	hsa	hsa	hsa-miR-190a-3p	UGT2B4		VWC2	ENST00000340652.4	von Willebrand factor C domain containing 2	5			VAMP4
Details	159	100	hsa-miR-190a-3p	TNFSF9	TNF superfamily member 9			MIRT504584	hsa	hsa	hsa-miR-190a-3p	ADH1B		ACTR10	ENST00000254286.4	actin-related protein 10 homolog (S. cerevisiae)	2144			HOXA11
Details	160	100	hsa-miR-190a-3p	ASB7	ankyrin repeat and SOCS box containing 7			MIRT504609	hsa	hsa	hsa-miR-190a-3p	MMADHC		ARHGAP24	ENST00000395184.1	Rho GTPase activating protein 24	9			LRP6
Details	161	100	hsa-miR-190a-3p	DNAJA1	DnaJ heat shock protein family (Hsp40) member A1			MIRT504631	hsa	hsa	hsa-miR-190a-3p	MFSD8		WDR20	ENST00000335263.5	WD repeat domain 20	288			ERRFI1
Details	162	100	hsa-miR-190a-3p	SCUBE1	signal peptide, CUB domain and EGF like domain containing 1			MIRT504674	hsa	hsa	hsa-miR-190a-3p	CYGB		APLP2	ENST00000263574.5	amyloid beta (A4) precursor-like protein 2	5552			IRF2BP2
Details	163	100	hsa-miR-190a-3p	EMC3	ER membrane protein complex subunit 3			MIRT504718	hsa	hsa	hsa-miR-190a-3p	PLEKHA6		DDX55	ENST00000238146.4	DEAD (Asp-Glu-Ala-Asp) box polypeptide 55	152			LIN28B
Details	164	100	hsa-miR-190a-3p	HMGB2	high mobility group box 2			MIRT504728	hsa	hsa	hsa-miR-190a-3p	DGKG		C10orf40	ENST00000521074.1	chromosome 10 open reading frame 40	5			SLC7A11
Details	165	100	hsa-miR-190a-3p	AKAP10	A-kinase anchoring protein 10			MIRT504774	hsa	hsa	hsa-miR-190a-3p	CLEC2D		EFNA2	ENST00000215368.2	ephrin-A2	83			ZBTB7A
Details	166	100	hsa-miR-190a-3p	MOSMO	modulator of smoothened			MIRT504811	hsa	hsa	hsa-miR-190a-3p	DOCK7		PLCXD1	ENST00000381657.2	phosphatidylinositol-specific phospholipase C, X domain containing 1	5			L2HGDH
Details	167	100	hsa-miR-190a-3p	TCF4	transcription factor 4			MIRT504819	hsa	hsa	hsa-miR-190a-3p	HOXD10		GRHL3	ENST00000361548.4	grainyhead-like 3 (Drosophila)	15			ETV6
Details	168	100	hsa-miR-190a-3p	CRADD	CASP2 and RIPK1 domain containing adaptor with death domain			MIRT504865	hsa	hsa	hsa-miR-190a-3p	VAMP4		GRTP1	ENST00000375431.4	growth hormone regulated TBC protein 1	1279			PUM1
Details	169	100	hsa-miR-190a-3p	BMP3	bone morphogenetic protein 3			MIRT504905	hsa	hsa	hsa-miR-190a-3p	LDHA		AC106876.2	ENST00000409905.1	Uncharacterized protein	5			SV2B
Details	170	100	hsa-miR-190a-3p	SERTM1	serine rich and transmembrane domain containing 1			MIRT504926	hsa	hsa	hsa-miR-190a-3p	IMPG2		RP11-386G21.1	ENST00000522186.1	Uncharacterized protein	5			SENP1
Details	171	100	hsa-miR-190a-3p	CREBZF	CREB/ATF bZIP transcription factor			MIRT504931	hsa	hsa	hsa-miR-190a-3p	CA12		PRIMA1	ENST00000393140.1	proline rich membrane anchor 1	5			ATP2B4
Details	172	100	hsa-miR-190a-3p	DENR	density regulated re-initiation and release factor			MIRT505091	hsa	hsa	hsa-miR-190a-3p	ZBED3		MDH1B	ENST00000374412.3	malate dehydrogenase 1B, NAD (soluble)	20			TMEM236
Details	173	100	hsa-miR-190a-3p	PANK4	pantothenate kinase 4			MIRT505171	hsa	hsa	hsa-miR-190a-3p	WDR76		SMIM11	ENST00000399299.1	small integral membrane protein 11	108			IL6ST
Details	174	100	hsa-miR-190a-3p	ZNF318	zinc finger protein 318			MIRT505257	hsa	hsa	hsa-miR-190a-3p	RPS27A		POLR2M	ENST00000299638.3	polymerase (RNA) II (DNA directed) polypeptide M	21			ANGPTL2
Details	175	100	hsa-miR-190a-3p	SORCS3	sortilin related VPS10 domain containing receptor 3			MIRT505433	hsa	hsa	hsa-miR-190a-3p	TBPL1		DIO2	ENST00000438257.4	deiodinase, iodothyronine, type II	98			ATP7A
Details	176	100	hsa-miR-190a-3p	KPNA4	karyopherin subunit alpha 4			MIRT505522	hsa	hsa	hsa-miR-190a-3p	SPATA2		PEX3	ENST00000367591.4	peroxisomal biogenesis factor 3	314			TAOK1
Details	177	100	hsa-miR-190a-3p	MIPOL1	mirror-image polydactyly 1			MIRT505746	hsa	hsa	hsa-miR-190a-3p	SENP1		PLSCR4	ENST00000354952.2	phospholipid scramblase 4	133			PRRC2C
Details	178	100	hsa-miR-190a-3p	LRRC31	leucine rich repeat containing 31			MIRT505765	hsa	hsa	hsa-miR-190a-3p	SEC23IP		REEP3	ENST00000373758.4	receptor accessory protein 3	1095			CNOT6L
Details	179	100	hsa-miR-190a-3p	PACSIN1	protein kinase C and casein kinase substrate in neurons 1			MIRT505794	hsa	hsa	hsa-miR-190a-3p	RSBN1		POLR2B	ENST00000314595.5	polymerase (RNA) II (DNA directed) polypeptide B, 140kDa	5807			DGKH
Details	180	100	hsa-miR-190a-3p	SEMA3F	semaphorin 3F			MIRT506024	hsa	hsa	hsa-miR-190a-3p	PUM1		CBWD7	ENST00000377391.3	COBW domain containing 7	5			QKI
Details	181	100	hsa-miR-190a-3p	ACVR2B	activin A receptor type 2B			MIRT506058	hsa	hsa	hsa-miR-190a-3p	PPP4R2		AL627171.2	ENST00000595378.1	HCG1786899; PRO2610; Uncharacterized protein	5			TMEM178B
Details	182	100	hsa-miR-190a-3p	SLC8A1	solute carrier family 8 member A1			MIRT506144	hsa	hsa	hsa-miR-190a-3p	PLEKHA3		DLX3	ENST00000434704.2	distal-less homeobox 3	5			TRIM23
Details	183	100	hsa-miR-190a-3p	SGPP1	sphingosine-1-phosphate phosphatase 1			MIRT506296	hsa	hsa	hsa-miR-190a-3p	PCMTD1		DLG3	ENST00000194900.4	discs, large homolog 3 (Drosophila)	185			CHST2
Details	184	100	hsa-miR-190a-3p	SLC16A6	solute carrier family 16 member 6			MIRT506408	hsa	hsa	hsa-miR-190a-3p	NRF1		AL353698.1	ENST00000433279.1	Uncharacterized protein	5			PURA
Details	185	100	hsa-miR-190a-3p	PMEPA1	prostate transmembrane protein, androgen induced 1			MIRT506552	hsa	hsa	hsa-miR-190a-3p	MON1B		TMEM69	ENST00000372025.4	transmembrane protein 69	20			PPP2R5E
Details	186	100	hsa-miR-190a-3p	RAB11FIP3	RAB11 family interacting protein 3			MIRT506609	hsa	hsa	hsa-miR-190a-3p	45722		TLR3	ENST00000296795.3	toll-like receptor 3	5			WNT5A
Details	187	100	hsa-miR-190a-3p	MPP6	membrane palmitoylated protein 6			MIRT506724	hsa	hsa	hsa-miR-190a-3p	LPAR3		THAP1	ENST00000345117.2	THAP domain containing, apoptosis associated protein 1	196			RAB5C
Details	188	100	hsa-miR-190a-3p	XPOT	exportin for tRNA			MIRT506736	hsa	hsa	hsa-miR-190a-3p	LMTK2		SEMA3F	ENST00000002829.3	sema domain, immunoglobulin domain (Ig), short basic domain, secreted, (semaphorin) 3F	263			ARSJ
Details	189	100	hsa-miR-190a-3p	PRDM11	PR/SET domain 11			MIRT506905	hsa	hsa	hsa-miR-190a-3p	KCNJ3		IL7	ENST00000263851.4	interleukin 7	5			DNAJB14
Details	190	100	hsa-miR-190a-3p	THOC3	THO complex 3			MIRT507176	hsa	hsa	hsa-miR-190a-3p	G3BP2		VAMP2	ENST00000404970.3	vesicle-associated membrane protein 2 (synaptobrevin 2)	1840			AR
Details	191	100	hsa-miR-190a-3p	ZBTB44	zinc finger and BTB domain containing 44			MIRT507314	hsa	hsa	hsa-miR-190a-3p	FBXL3		LMCD1	ENST00000157600.3	LIM and cysteine-rich domains 1	1023			PTPRJ
Details	192	100	hsa-miR-190a-3p	SIX4	SIX homeobox 4			MIRT507389	hsa	hsa	hsa-miR-190a-3p	EMC7		HCN1	ENST00000303230.4	hyperpolarization activated cyclic nucleotide-gated potassium channel 1	5			SGPP2
Details	193	100	hsa-miR-190a-3p	CREB1	cAMP responsive element binding protein 1			MIRT507478	hsa	hsa	hsa-miR-190a-3p	E2F8		CCAR1	ENST00000265872.6	cell division cycle and apoptosis regulator 1	1502			NDFIP2
Details	194	100	hsa-miR-190a-3p	KCNMA1	potassium calcium-activated channel subfamily M alpha 1			MIRT507619	hsa	hsa	hsa-miR-190a-3p	CSRNP3		MAGEL2	ENST00000532292.1	MAGE-like 2	5			GABRG1
Details	195	100	hsa-miR-190a-3p	PCGF2	polycomb group ring finger 2			MIRT507824	hsa	hsa	hsa-miR-190a-3p	CD55		ADH1B	ENST00000305046.8	alcohol dehydrogenase 1B (class I), beta polypeptide	5			UBN2
Details	196	100	hsa-miR-190a-3p	HOXC4	homeobox C4			MIRT508029	hsa	hsa	hsa-miR-190a-3p	BACH2		NCSTN	ENST00000294785.5	nicastrin	578			CLEC2D
Details	197	100	hsa-miR-190a-3p	KDM6A	lysine demethylase 6A			MIRT508103	hsa	hsa	hsa-miR-190a-3p	AMER1		KCNN3	ENST00000271915.4	potassium intermediate/small conductance calcium-activated channel, subfamily N, member 3	5			CDON
Details	198	100	hsa-miR-190a-3p	TRPM6	transient receptor potential cation channel subfamily M member 6			MIRT508191	hsa	hsa	hsa-miR-190a-3p	PTP4A2		GPX8	ENST00000296734.6	glutathione peroxidase 8 (putative)	2107			ATXN3
Details	199	100	hsa-miR-190a-3p	SLC10A7	solute carrier family 10 member 7			MIRT508258	hsa	hsa	hsa-miR-190a-3p	CD226		TMEM261	ENST00000358227.4	transmembrane protein 261	61			UNK
Details	200	100	hsa-miR-190a-3p	FGD4	FYVE, RhoGEF and PH domain containing 4			MIRT508277	hsa	hsa	hsa-miR-190a-3p	ADCYAP1		RP1-170O19.20	ENST00000470747.4	Uncharacterized protein	151			ZNF318
Details	201	100	hsa-miR-190a-3p	KLF7	Kruppel like factor 7			MIRT508322	hsa	hsa	hsa-miR-190a-3p	CCDC38		DLG1	ENST00000346964.2	discs, large homolog 1 (Drosophila)	813			KHSRP
Details	202	100	hsa-miR-190a-3p	POU2F2	POU class 2 homeobox 2			MIRT508340	hsa	hsa	hsa-miR-190a-3p	ZNF273		GRAMD1B	ENST00000529750.1	GRAM domain containing 1B	35			ZMYM2
Details	203	100	hsa-miR-190a-3p	ARHGEF33	Rho guanine nucleotide exchange factor 33			MIRT508365	hsa	hsa	hsa-miR-190a-3p	ITPRIPL1		RAD23A	ENST00000586534.1	RAD23 homolog A (S. cerevisiae)	58			TIMM10
Details	204	100	hsa-miR-190a-3p	VAMP4	vesicle associated membrane protein 4			MIRT508415	hsa	hsa	hsa-miR-190a-3p	MYBL1		PLAGL1	ENST00000360537.2	pleiomorphic adenoma gene-like 1	40			ARHGEF33
Details	205	100	hsa-miR-190a-3p	MAP9	microtubule associated protein 9			MIRT508440	hsa	hsa	hsa-miR-190a-3p	ZNF608		CCL15	ENST00000354059.4	chemokine (C-C motif) ligand 15	135			NAA40
Details	206	100	hsa-miR-190a-3p	GSK3B	glycogen synthase kinase 3 beta			MIRT508530	hsa	hsa	hsa-miR-190a-3p	RPP14		RYBP	ENST00000477973.2	RING1 and YY1 binding protein	342			IFNAR1
Details	207	100	hsa-miR-190a-3p	G3BP2	G3BP stress granule assembly factor 2			MIRT508581	hsa	hsa	hsa-miR-190a-3p	ZNF516		UTP3	ENST00000254803.2	UTP3, small subunit (SSU) processome component, homolog (S. cerevisiae)	1100			NAA25
Details	208	100	hsa-miR-190a-3p	WDR63	WD repeat domain 63			MIRT508597	hsa	hsa	hsa-miR-190a-3p	CREB1		FCHO2	ENST00000430046.2	FCH domain only 2	158			FBXW7
Details	209	100	hsa-miR-190a-3p	EP300	E1A binding protein p300			MIRT508616	hsa	hsa	hsa-miR-190a-3p	HOXC4		RP11-738G5.2	ENST00000520800.1	Uncharacterized protein	5			PTEN
Details	210	100	hsa-miR-190a-3p	PHEX	phosphate regulating endopeptidase homolog X-linked			MIRT508631	hsa	hsa	hsa-miR-190a-3p	EIF2B1		CDC42SE2	ENST00000505065.1	CDC42 small effector 2	1057			TMEM47
Details	211	100	hsa-miR-190a-3p	SGCD	sarcoglycan delta			MIRT508675	hsa	hsa	hsa-miR-190a-3p	TBX20		CCDC110	ENST00000393540.3	coiled-coil domain containing 110	10			RAI1
Details	212	100	hsa-miR-190a-3p	AGPS	alkylglycerone phosphate synthase			MIRT508683	hsa	hsa	hsa-miR-190a-3p	ENTHD1		NEUROD1	ENST00000295108.3	neuronal differentiation 1	5			NFIA
Details	213	100	hsa-miR-190a-3p	PYHIN1	pyrin and HIN domain family member 1			MIRT508691	hsa	hsa	hsa-miR-190a-3p	NRIP1		FOXF1	ENST00000262426.4	forkhead box F1	836			NDST1
Details	214	100	hsa-miR-190a-3p	WNT11	Wnt family member 11			MIRT508765	hsa	hsa	hsa-miR-190a-3p	ETV6		RTN4RL1	ENST00000331238.6	reticulon 4 receptor-like 1	82			ZNF609
Details	215	100	hsa-miR-190a-3p	SYP	synaptophysin			MIRT508783	hsa	hsa	hsa-miR-190a-3p	CDKL1		ALG10B	ENST00000308742.4	ALG10B, alpha-1,2-glucosyltransferase	471			IKZF2
Details	216	100	hsa-miR-190a-3p	PRIMA1	proline rich membrane anchor 1			MIRT508794	hsa	hsa	hsa-miR-190a-3p	NTRK3		SKA1	ENST00000285116.3	spindle and kinetochore associated complex subunit 1	86			CUL2
Details	217	100	hsa-miR-190a-3p	UNC5A	unc-5 netrin receptor A			MIRT508842	hsa	hsa	hsa-miR-190a-3p	TMCO1		FOLH1	ENST00000256999.2	folate hydrolase (prostate-specific membrane antigen) 1	5			IRS1
Details	218	100	hsa-miR-190a-3p	ADCYAP1	adenylate cyclase activating polypeptide 1			MIRT508964	hsa	hsa	hsa-miR-190a-3p	TECRL		SHOX2	ENST00000490689.2	short stature homeobox 2	66			TSEN34
Details	219	100	hsa-miR-190a-3p	NEXMIF	neurite extension and migration factor			MIRT508971	hsa	hsa	hsa-miR-190a-3p	MLLT3		RAB38	ENST00000243662.6	RAB38, member RAS oncogene family	11			MSI2
Details	220	100	hsa-miR-190a-3p	PIK3R1	phosphoinositide-3-kinase regulatory subunit 1			MIRT508987	hsa	hsa	hsa-miR-190a-3p	DCLRE1C		ASNSD1	ENST00000260952.4	asparagine synthetase domain containing 1	1555			NFIC
Details	221	100	hsa-miR-190a-3p	ATN1	atrophin 1			MIRT508991	hsa	hsa	hsa-miR-190a-3p	TNFRSF9		MARC2	ENST00000366913.3	mitochondrial amidoxime reducing component 2	213			ARHGAP29
Details	222	100	hsa-miR-190a-3p	ZER1	zyg-11 related cell cycle regulator			MIRT509016	hsa	hsa	hsa-miR-190a-3p	CUL2		CNOT7	ENST00000361272.4	CCR4-NOT transcription complex, subunit 7	415			KAT6A
Details	223	100	hsa-miR-190a-3p	VEGFA	vascular endothelial growth factor A			MIRT509078	hsa	hsa	hsa-miR-190a-3p	RABGAP1		SRGN	ENST00000242465.3	serglycin	1156			ARHGAP21
Details	224	100	hsa-miR-190a-3p	GABRG1	gamma-aminobutyric acid type A receptor gamma1 subunit			MIRT509153	hsa	hsa	hsa-miR-190a-3p	SLC25A27		PPP3CC	ENST00000289963.8	protein phosphatase 3, catalytic subunit, gamma isozyme	254			CEP97
Details	225	100	hsa-miR-190a-3p	F9	coagulation factor IX			MIRT509167	hsa	hsa	hsa-miR-190a-3p	EFHC1		ZNF678	ENST00000343776.5	zinc finger protein 678	89			TNPO1
Details	226	100	hsa-miR-190a-3p	TMEM178B	transmembrane protein 178B			MIRT509179	hsa	hsa	hsa-miR-190a-3p	HS2ST1		BLZF1	ENST00000367808.3	basic leucine zipper nuclear factor 1	73			ZMAT3
Details	227	100	hsa-miR-190a-3p	TCF7L2	transcription factor 7 like 2			MIRT509183	hsa	hsa	hsa-miR-190a-3p	TSPAN2		LUZP4	ENST00000371920.3	leucine zipper protein 4	5			E2F8
Details	228	100	hsa-miR-190a-3p	KLHDC1	kelch domain containing 1			MIRT509207	hsa	hsa	hsa-miR-190a-3p	BRCC3		SGCD	ENST00000435422.3	sarcoglycan, delta (35kDa dystrophin-associated glycoprotein)	39			CARF
Details	229	100	hsa-miR-190a-3p	BCL6	BCL6, transcription repressor			MIRT509221	hsa	hsa	hsa-miR-190a-3p	PYHIN1		POLR2K	ENST00000353107.3	polymerase (RNA) II (DNA directed) polypeptide K, 7.0kDa	902			EPHA5
Details	230	100	hsa-miR-190a-3p	PKIA	cAMP-dependent protein kinase inhibitor alpha			MIRT509234	hsa	hsa	hsa-miR-190a-3p	PDE10A		C16orf52	ENST00000542527.2	chromosome 16 open reading frame 52	102			BRCC3
Details	231	100	hsa-miR-190a-3p	MYF5	myogenic factor 5			MIRT509243	hsa	hsa	hsa-miR-190a-3p	OTX1		AIG1	ENST00000357847.4	androgen-induced 1	1226			F2RL1
Details	232	100	hsa-miR-190a-3p	IGF1	insulin like growth factor 1			MIRT509262	hsa	hsa	hsa-miR-190a-3p	SUCNR1		PLS1	ENST00000457734.2	plastin 1	467			DUSP8
Details	233	100	hsa-miR-190a-3p	OSBP2	oxysterol binding protein 2			MIRT509439	hsa	hsa	hsa-miR-190a-3p	SRP72		RP11-156E8.1	ENST00000607453.1		51			RIC8B
Details	234	100	hsa-miR-190a-3p	KALRN	kalirin RhoGEF kinase			MIRT509445	hsa	hsa	hsa-miR-190a-3p	POU2F2		ID2	ENST00000234091.4	inhibitor of DNA binding 2, dominant negative helix-loop-helix protein	20			SVIP
Details	235	100	hsa-miR-190a-3p	TNRC18	trinucleotide repeat containing 18			MIRT509465	hsa	hsa	hsa-miR-190a-3p	TRIM2		ROCK2	ENST00000315872.6	Rho-associated, coiled-coil containing protein kinase 2	142			DDX17
Details	236	100	hsa-miR-190a-3p	PEX5L	peroxisomal biogenesis factor 5 like			MIRT509484	hsa	hsa	hsa-miR-190a-3p	LARP1		ABHD10	ENST00000494817.1	abhydrolase domain containing 10	929			GSK3B
Details	237	100	hsa-miR-190a-3p	EPHA1	EPH receptor A1			MIRT509533	hsa	hsa	hsa-miR-190a-3p	RSBN1L		KIAA1430	ENST00000458385.2	KIAA1430	75			STAM
Details	238	100	hsa-miR-190a-3p	ZBTB34	zinc finger and BTB domain containing 34			MIRT509601	hsa	hsa	hsa-miR-190a-3p	SPSB1		AP1S1	ENST00000337619.5	adaptor-related protein complex 1, sigma 1 subunit	750			TMTC3
Details	239	100	hsa-miR-190a-3p	C2orf49	chromosome 2 open reading frame 49			MIRT509698	hsa	hsa	hsa-miR-190a-3p	FOXL1		DEGS1	ENST00000323699.4	delta(4)-desaturase, sphingolipid 1	1549			SMAD9
Details	240	100	hsa-miR-190a-3p	RABGAP1	RAB GTPase activating protein 1			MIRT509702	hsa	hsa	hsa-miR-190a-3p	RAPH1		EVI5	ENST00000370331.1	ecotropic viral integration site 5	172			THSD7A
Details	241	100	hsa-miR-190a-3p	COL4A1	collagen type IV alpha 1 chain			MIRT509757	hsa	hsa	hsa-miR-190a-3p	KIAA2018		DNAJA1	ENST00000330899.4	DnaJ (Hsp40) homolog, subfamily A, member 1	789			GRID2
Details	242	100	hsa-miR-190a-3p	RSBN1L	round spermatid basic protein 1 like			MIRT509771	hsa	hsa	hsa-miR-190a-3p	SERTM1		SMAD6	ENST00000288840.5	SMAD family member 6	660			NLGN4X
Details	243	100	hsa-miR-190a-3p	ABHD18	abhydrolase domain containing 18			MIRT509799	hsa	hsa	hsa-miR-190a-3p	CHAF1B		MAP3K12	ENST00000267079.2	mitogen-activated protein kinase kinase kinase 12	61			TTYH3
Details	244	100	hsa-miR-190a-3p	GIGYF2	GRB10 interacting GYF protein 2			MIRT509817	hsa	hsa	hsa-miR-190a-3p	SULT1B1		ZNF441	ENST00000357901.4	zinc finger protein 441	5			GRIK3
Details	245	100	hsa-miR-190a-3p	CARF	calcium responsive transcription factor			MIRT509833	hsa	hsa	hsa-miR-190a-3p	TACR3		MEF2A	ENST00000354410.5	myocyte enhancer factor 2A	654			SLC16A6
Details	246	100	hsa-miR-190a-3p	KLF6	Kruppel like factor 6			MIRT509872	hsa	hsa	hsa-miR-190a-3p	CASD1		COL4A5	ENST00000361603.2	collagen, type IV, alpha 5	715			POU2F2
Details	247	100	hsa-miR-190a-3p	PPP4R2	protein phosphatase 4 regulatory subunit 2			MIRT509897	hsa	hsa	hsa-miR-190a-3p	HHIP		TMEM19	ENST00000266673.5	transmembrane protein 19	1378			PEX5L
Details	248	100	hsa-miR-190a-3p	IL1RAP	interleukin 1 receptor accessory protein			MIRT509917	hsa	hsa	hsa-miR-190a-3p	WDR92		MAT2B	ENST00000518095.1	methionine adenosyltransferase II, beta	1901			B4GALT6
Details	249	100	hsa-miR-190a-3p	TMCO1	transmembrane and coiled-coil domains 1			MIRT509934	hsa	hsa	hsa-miR-190a-3p	USP25		C4orf32	ENST00000309733.5	chromosome 4 open reading frame 32	325			HSPA13
Details	250	100	hsa-miR-190a-3p	CTLA4	cytotoxic T-lymphocyte associated protein 4			MIRT509952	hsa	hsa	hsa-miR-190a-3p	ITGA1		SNRPF	ENST00000266735.5	small nuclear ribonucleoprotein polypeptide F	286			ITGA1
Details	251	100	hsa-miR-190a-3p	ATP10A	ATPase phospholipid transporting 10A (putative)			MIRT509961	hsa	hsa	hsa-miR-190a-3p	KANSL1L		BMP2	ENST00000378827.4	bone morphogenetic protein 2	1193			DAPK1
Details	252	100	hsa-miR-190a-3p	SAMD12	sterile alpha motif domain containing 12			MIRT509986	hsa	hsa	hsa-miR-190a-3p	GTF2H1		CPA6	ENST00000518549.1	carboxypeptidase A6	5			ZNF516
Details	253	100	hsa-miR-190a-3p	NLRP8	NLR family pyrin domain containing 8			MIRT509991	hsa	hsa	hsa-miR-190a-3p	AGPS		FRMD3	ENST00000304195.3	FERM domain containing 3	14			ZNF529
Details	254	100	hsa-miR-190a-3p	ATP2B2	ATPase plasma membrane Ca2+ transporting 2			MIRT509999	hsa	hsa	hsa-miR-190a-3p	ARID3A		KCNJ3	ENST00000295101.2	potassium inwardly-rectifying channel, subfamily J, member 3	21			DOCK4
Details	255	100	hsa-miR-190a-3p	KIRREL1	kirre like nephrin family adhesion molecule 1			MIRT510034	hsa	hsa	hsa-miR-190a-3p	NAA25		CBWD5	ENST00000382405.3	COBW domain containing 5	5			ADCYAP1
Details	256	100	hsa-miR-190a-3p	IGFBP1	insulin like growth factor binding protein 1			MIRT510050	hsa	hsa	hsa-miR-190a-3p	LRP6		CBWD3	ENST00000360171.6	COBW domain containing 3	5			NTRK3
Details	257	100	hsa-miR-190a-3p	PPIP5K1	diphosphoinositol pentakisphosphate kinase 1			MIRT510124	hsa	hsa	hsa-miR-190a-3p	COL8A1		RNF44	ENST00000274811.4	ring finger protein 44	1623			ZNF264
Details	258	100	hsa-miR-190a-3p	EVI5	ecotropic viral integration site 5			MIRT510130	hsa	hsa	hsa-miR-190a-3p	C2orf49		SLC52A1	ENST00000512825.2	solute carrier family 52 (riboflavin transporter), member 1	5			PCDH7
Details	259	100	hsa-miR-190a-3p	LEMD3	LEM domain containing 3			MIRT510158	hsa	hsa	hsa-miR-190a-3p	STARD8		ZNF385D	ENST00000281523.2	zinc finger protein 385D	5			ADCY9
Details	260	100	hsa-miR-190a-3p	SETD3	SET domain containing 3, actin histidine methyltransferase			MIRT510196	hsa	hsa	hsa-miR-190a-3p	CYP4F11		ST8SIA4	ENST00000231461.5	ST8 alpha-N-acetyl-neuraminide alpha-2,8-sialyltransferase 4	5			POU2F1
Details	261	100	hsa-miR-190a-3p	AR	androgen receptor			MIRT510230	hsa	hsa	hsa-miR-190a-3p	TNFSF9		UBALD2	ENST00000327490.6	UBA-like domain containing 2	506			PAPSS2
Details	262	100	hsa-miR-190a-3p	TMEM161B	transmembrane protein 161B			MIRT510244	hsa	hsa	hsa-miR-190a-3p	ATP5S		MSX2	ENST00000239243.6	msh homeobox 2	316			PTPRD
Details	263	100	hsa-miR-190a-3p	SCN3A	sodium voltage-gated channel alpha subunit 3			MIRT510264	hsa	hsa	hsa-miR-190a-3p	DDX55		SNX7	ENST00000306121.3	sorting nexin 7	4601			ZBTB20
Details	264	100	hsa-miR-190a-3p	RUNX1T1	RUNX1 translocation partner 1			MIRT510328	hsa	hsa	hsa-miR-190a-3p	ZXDA		DUT	ENST00000559540.1	deoxyuridine triphosphatase	1860			G3BP2
Details	265	100	hsa-miR-190a-3p	DDX17	DEAD-box helicase 17			MIRT510436	hsa	hsa	hsa-miR-190a-3p	ZIC5		ZCCHC12	ENST00000310164.2	zinc finger, CCHC domain containing 12	217			SLC30A4
Details	266	100	hsa-miR-190a-3p	INO80D	INO80 complex subunit D			MIRT510445	hsa	hsa	hsa-miR-190a-3p	ZFHX3		RAP1A	ENST00000369709.3	RAP1A, member of RAS oncogene family	382			PLEKHM3
Details	267	100	hsa-miR-190a-3p	PRTG	protogenin			MIRT510481	hsa	hsa	hsa-miR-190a-3p	YWHAZ		GMFB	ENST00000554908.1	glia maturation factor, beta	15			APOL6
Details	268	100	hsa-miR-190a-3p	SHOX2	short stature homeobox 2			MIRT510671	hsa	hsa	hsa-miR-190a-3p	SV2B		EP300	ENST00000263253.7	E1A binding protein p300	785			DGKG
Details	269	100	hsa-miR-190a-3p	MKRN3	makorin ring finger protein 3			MIRT510678	hsa	hsa	hsa-miR-190a-3p	STRN		FBXL14	ENST00000339235.3	F-box and leucine-rich repeat protein 14	76			FER
Details	270	100	hsa-miR-190a-3p	TRAM1	translocation associated membrane protein 1			MIRT510708	hsa	hsa	hsa-miR-190a-3p	SPPL2A		HOXA9	ENST00000396345.1	homeobox A9	151			CRIM1
Details	271	100	hsa-miR-190a-3p	RAB5B	RAB5B, member RAS oncogene family			MIRT510744	hsa	hsa	hsa-miR-190a-3p	SLC8A1		EFNB2	ENST00000245323.4	ephrin-B2	25			SLC8A1
Details	272	100	hsa-miR-190a-3p	SUSD6	sushi domain containing 6			MIRT510806	hsa	hsa	hsa-miR-190a-3p	SENP3		RBP3	ENST00000224600.4	retinol binding protein 3, interstitial	5			TSPAN2
Details	273	100	hsa-miR-190a-3p	PQLC2L	PQ loop repeat containing 2 like			MIRT510831	hsa	hsa	hsa-miR-190a-3p	RTN4RL1		ZNF568	ENST00000415168.1	zinc finger protein 568	127			XRN1
Details	274	100	hsa-miR-190a-3p	IRAK1BP1	interleukin 1 receptor associated kinase 1 binding protein 1			MIRT510840	hsa	hsa	hsa-miR-190a-3p	RCAN2		CTD-2054N24.2	ENST00000559714.1	Uncharacterized protein	21			NFIB
Details	275	100	hsa-miR-190a-3p	VENTX	VENT homeobox			MIRT510885	hsa	hsa	hsa-miR-190a-3p	RAB5B		GNG12	ENST00000370982.3	guanine nucleotide binding protein (G protein), gamma 12	1362			SPPL3
Details	276	100	hsa-miR-190a-3p	TBC1D19	TBC1 domain family member 19			MIRT510898	hsa	hsa	hsa-miR-190a-3p	PURG		NRF1	ENST00000393230.2	nuclear respiratory factor 1	321			ACVR2B
Details	277	100	hsa-miR-190a-3p	RTN4RL1	reticulon 4 receptor like 1			MIRT510903	hsa	hsa	hsa-miR-190a-3p	PURA		LEPROT	ENST00000371065.4	leptin receptor overlapping transcript	397			CREB1
Details	278	100	hsa-miR-190a-3p	SMCO1	single-pass membrane protein with coiled-coil domains 1			MIRT510924	hsa	hsa	hsa-miR-190a-3p	PRRX1		UCK2	ENST00000372212.4	uridine-cytidine kinase 2	437			PROX1
Details	279	100	hsa-miR-190a-3p	KIAA0825	KIAA0825			MIRT510932	hsa	hsa	hsa-miR-190a-3p	PROX1		NUBP1	ENST00000283027.5	nucleotide binding protein 1	21			USP6NL
Details	280	100	hsa-miR-190a-3p	CD44	CD44 molecule (Indian blood group)			MIRT510995	hsa	hsa	hsa-miR-190a-3p	PCBP2		B3GALT2	ENST00000367434.4	UDP-Gal:betaGlcNAc beta 1,3-galactosyltransferase, polypeptide 2	5			DDX6
Details	281	100	hsa-miR-190a-3p	PIK3CB	phosphatidylinositol-4,5-bisphosphate 3-kinase catalytic subunit beta			MIRT510999	hsa	hsa	hsa-miR-190a-3p	PAQR3		PPP3R1	ENST00000234310.3	protein phosphatase 3, regulatory subunit B, alpha	117			SIPA1L3
Details	282	100	hsa-miR-190a-3p	LAMP2	lysosomal associated membrane protein 2			MIRT511118	hsa	hsa	hsa-miR-190a-3p	NDST1		PGAM1	ENST00000334828.5	phosphoglycerate mutase 1 (brain)	927			DTX4
Details	283	100	hsa-miR-190a-3p	SIK3	SIK family kinase 3			MIRT511129	hsa	hsa	hsa-miR-190a-3p	NABP1		RGMB	ENST00000308234.7	RGM domain family, member B	6087			ASH1L
Details	284	100	hsa-miR-190a-3p	AMER1	APC membrane recruitment protein 1			MIRT511166	hsa	hsa	hsa-miR-190a-3p	MBNL3		IGF1	ENST00000337514.6	insulin-like growth factor 1 (somatomedin C)	19			RUNX1T1
Details	285	100	hsa-miR-190a-3p	CNKSR2	connector enhancer of kinase suppressor of Ras 2			MIRT511174	hsa	hsa	hsa-miR-190a-3p	MARCKS		NLRP8	ENST00000291971.3	NLR family, pyrin domain containing 8	5			TRIM2
Details	286	100	hsa-miR-190a-3p	OTX1	orthodenticle homeobox 1			MIRT511194	hsa	hsa	hsa-miR-190a-3p	MAP3K12		DIMT1	ENST00000199320.4	DIM1 dimethyladenosine transferase 1 homolog (S. cerevisiae)	481			LARP1
Details	287	100	hsa-miR-190a-3p	CNOT7	CCR4-NOT transcription complex subunit 7			MIRT511224	hsa	hsa	hsa-miR-190a-3p	KPNA4		DMRTA2	ENST00000418121.1	DMRT-like family A2	9			ZNF512B
Details	288	100	hsa-miR-190a-3p	GTPBP2	GTP binding protein 2			MIRT511325	hsa	hsa	hsa-miR-190a-3p	KIAA1522		TRAT1	ENST00000295756.6	T cell receptor associated transmembrane adaptor 1	5			ACER3
Details	289	100	hsa-miR-190a-3p	SPPL3	signal peptide peptidase like 3			MIRT511354	hsa	hsa	hsa-miR-190a-3p	ITPRIPL2		GTPBP2	ENST00000307126.5	GTP binding protein 2	388			ERC1
Details	290	100	hsa-miR-190a-3p	WDFY3	WD repeat and FYVE domain containing 3			MIRT511517	hsa	hsa	hsa-miR-190a-3p	HMGB2		NPY2R	ENST00000506608.1	neuropeptide Y receptor Y2	5			IKZF4
Details	291	100	hsa-miR-190a-3p	AHCYL2	adenosylhomocysteinase like 2			MIRT511666	hsa	hsa	hsa-miR-190a-3p	HIST1H3B		APCS	ENST00000255040.2	amyloid P component, serum	5			MFAP5
Details	292	100	hsa-miR-190a-3p	SLC24A2	solute carrier family 24 member 2			MIRT511920	hsa	hsa	hsa-miR-190a-3p	FKBP14		HIST1H2AC	ENST00000602637.1	histone cluster 1, H2ac	1665			SLITRK4
Details	293	100	hsa-miR-190a-3p	ITPRIPL2	ITPRIP like 2			MIRT511952	hsa	hsa	hsa-miR-190a-3p	EVI5		ZNF677	ENST00000599012.1	zinc finger protein 677	51			CEP104
Details	294	100	hsa-miR-190a-3p	NOX4	NADPH oxidase 4			MIRT512007	hsa	hsa	hsa-miR-190a-3p	DTX4		CRISP1	ENST00000335847.4	cysteine-rich secretory protein 1	5			LDLR
Details	295	100	hsa-miR-190a-3p	AKAP8	A-kinase anchoring protein 8			MIRT512072	hsa	hsa	hsa-miR-190a-3p	DDX6		KCNV1	ENST00000524391.1	potassium channel, subfamily V, member 1	5			ACBD5
Details	296	100	hsa-miR-190a-3p	BTBD1	BTB domain containing 1			MIRT512152	hsa	hsa	hsa-miR-190a-3p	CFL2		FEZF2	ENST00000486811.1	FEZ family zinc finger 2	5			PRR23A
Details	297	100	hsa-miR-190a-3p	BACH2	BTB domain and CNC homolog 2			MIRT512218	hsa	hsa	hsa-miR-190a-3p	BMP2K		TMEM196	ENST00000405844.1	transmembrane protein 196	5			MIPOL1
Details	298	100	hsa-miR-190a-3p	FKBP14	FKBP prolyl isomerase 14			MIRT512268	hsa	hsa	hsa-miR-190a-3p	ARHGEF33		RBM23	ENST00000555209.1	RNA binding motif protein 23	1540			SNRK
Details	299	100	hsa-miR-190a-3p	LOC403312	putative uncharacterized protein MGC39545			MIRT512309	hsa	hsa	hsa-miR-190a-3p	ADCY9		SAMSN1	ENST00000400564.1	SAM domain, SH3 domain and nuclear localization signals 1	5			KANSL1L
Details	300	100	hsa-miR-190a-3p	CUL2	cullin 2			MIRT512336	hsa	hsa	hsa-miR-190a-3p	ABI2		AC104472.1	ENST00000399242.2	CDNA FLJ26134 fis, clone TMS03713; Uncharacterized protein	5			SNRPD1
Details	301	100	hsa-miR-190a-3p	L1CAM	L1 cell adhesion molecule			MIRT512997	hsa	hsa	hsa-miR-190a-3p	TRPM6		GSTT2	ENST00000215780.5	glutathione S-transferase theta 2	5			PALM2-AKAP2
Details	302	100	hsa-miR-190a-3p	USP6NL	USP6 N-terminal like			MIRT514204	hsa	hsa	hsa-miR-190a-3p	LRRC63		GSTT2B	ENST00000290765.4	glutathione S-transferase theta 2B (gene/pseudogene)	5			AKAP2
Details	303	100	hsa-miR-190a-3p	KLHL23	kelch like family member 23			MIRT514232	hsa	hsa	hsa-miR-190a-3p	EPOR		RAB11FIP2	ENST00000355624.3	RAB11 family interacting protein 2 (class I)	449			USP51
Details	304	100	hsa-miR-190a-3p	AHNAK	AHNAK nucleoprotein			MIRT514438	hsa	hsa	hsa-miR-190a-3p	C15orf59		AGO3	ENST00000373191.4	argonaute RISC catalytic component 3	198			ZNF562
Details	305	100	hsa-miR-190a-3p	HOXA11	homeobox A11			MIRT514456	hsa	hsa	hsa-miR-190a-3p	KARS		MNX1	ENST00000252971.6	motor neuron and pancreas homeobox 1	887			PLEKHA1
Details	306	100	hsa-miR-190a-3p	IRS1	insulin receptor substrate 1			MIRT514648	hsa	hsa	hsa-miR-190a-3p	CRADD		KCTD1	ENST00000579973.1	potassium channel tetramerization domain containing 1	33			TPPP
Details	307	100	hsa-miR-190a-3p	KCNN3	potassium calcium-activated channel subfamily N member 3			MIRT514704	hsa	hsa	hsa-miR-190a-3p	PHEX		HACE1	ENST00000262903.4	HECT domain and ankyrin repeat containing E3 ubiquitin protein ligase 1	191			SLC12A2
Details	308	100	hsa-miR-190a-3p	SGPP2	sphingosine-1-phosphate phosphatase 2			MIRT514744	hsa	hsa	hsa-miR-190a-3p	ACER3		ADH7	ENST00000437033.2	alcohol dehydrogenase 7 (class IV), mu or sigma polypeptide	5			SMARCAD1
Details	309	100	hsa-miR-190a-3p	DLG3	discs large MAGUK scaffold protein 3			MIRT514819	hsa	hsa	hsa-miR-190a-3p	TSNARE1		DLG2	ENST00000398309.2	discs, large homolog 2 (Drosophila)	15			MFSD8
Details	310	100	hsa-miR-190a-3p	KCNE3	potassium voltage-gated channel subfamily E regulatory subunit 3			MIRT514862	hsa	hsa	hsa-miR-190a-3p	SHOX2		VSNL1	ENST00000406397.1	visinin-like 1	89			UHMK1
Details	311	100	hsa-miR-190a-3p	TRIM23	tripartite motif containing 23			MIRT514938	hsa	hsa	hsa-miR-190a-3p	GPR141		SH3BGRL2	ENST00000369838.4	SH3 domain binding glutamic acid-rich protein like 2	32			HS2ST1
Details	312	100	hsa-miR-190a-3p	RC3H1	ring finger and CCCH-type domains 1			MIRT514979	hsa	hsa	hsa-miR-190a-3p	CABP4		FABP7	ENST00000356535.4	fatty acid binding protein 7, brain	5			SLC45A4
Details	313	100	hsa-miR-190a-3p	WDR20	WD repeat domain 20			MIRT515320	hsa	hsa	hsa-miR-190a-3p	SLC35E3		TAS2R20	ENST00000538986.1	taste receptor, type 2, member 20	17			PDE10A
Details	314	100	hsa-miR-190a-3p	LRP6	LDL receptor related protein 6			MIRT515393	hsa	hsa	hsa-miR-190a-3p	ARHGAP21		C2orf49	ENST00000258457.2	chromosome 2 open reading frame 49	161			N4BP1
Details	315	100	hsa-miR-190a-3p	PITPNC1	phosphatidylinositol transfer protein cytoplasmic 1			MIRT515403	hsa	hsa	hsa-miR-190a-3p	WDR72		NMT1	ENST00000592782.1	N-myristoyltransferase 1	1991			HUWE1
Details	316	100	hsa-miR-190a-3p	TBX4	T-box 4			MIRT515509	hsa	hsa	hsa-miR-190a-3p	CCT4		F3	ENST00000334047.7	coagulation factor III (thromboplastin, tissue factor)	13568			FAM120AOS
Details	317	100	hsa-miR-190a-3p	ZNF608	zinc finger protein 608			MIRT515542	hsa	hsa	hsa-miR-190a-3p	KRT222		CCL11	ENST00000305869.3	chemokine (C-C motif) ligand 11	12			ARID5B
Details	318	100	hsa-miR-190a-3p	ZNF529	zinc finger protein 529			MIRT515635	hsa	hsa	hsa-miR-190a-3p	MYBPC1		KPNA4	ENST00000334256.4	karyopherin alpha 4 (importin alpha 3)	111			MTF1
Details	319	100	hsa-miR-190a-3p	GRIA2	glutamate ionotropic receptor AMPA type subunit 2			MIRT515660	hsa	hsa	hsa-miR-190a-3p	RIC8B		STRN	ENST00000263918.4	striatin, calmodulin binding protein	476			STOX2
Details	320	100	hsa-miR-190a-3p	LDLR	low density lipoprotein receptor			MIRT515778	hsa	hsa	hsa-miR-190a-3p	NLGN4X		ZFP36	ENST00000597629.1	ZFP36 ring finger protein	157			KIAA1522
Details	321	100	hsa-miR-190a-3p	SLC7A11	solute carrier family 7 member 11			MIRT515816	hsa	hsa	hsa-miR-190a-3p	FOCAD		ABLIM3	ENST00000326685.7	actin binding LIM protein family, member 3	9			LHFPL5
Details	322	100	hsa-miR-190a-3p	NXPH2	neurexophilin 2			MIRT515843	hsa	hsa	hsa-miR-190a-3p	AJAP1		MDH1	ENST00000233114.8	malate dehydrogenase 1, NAD (soluble)	1790			KCNB1
Details	323	100	hsa-miR-190a-3p	DCN	decorin			MIRT515860	hsa	hsa	hsa-miR-190a-3p	NAA40		CENPQ	ENST00000335783.3	centromere protein Q	249			ADAMTS9
Details	324	100	hsa-miR-190a-3p	ADCY9	adenylate cyclase 9			MIRT515872	hsa	hsa	hsa-miR-190a-3p	PLXDC2		SPIRE2	ENST00000378247.3	spire-type actin nucleation factor 2	94			RSBN1
Details	325	100	hsa-miR-190a-3p	ANKRD30B	ankyrin repeat domain 30B			MIRT515886	hsa	hsa	hsa-miR-190a-3p	FAM182B		BEX4	ENST00000372695.5	brain expressed, X-linked 4	136			PHEX
Details	326	100	hsa-miR-190a-3p	AKAP2	A-kinase anchoring protein 2			MIRT515967	hsa	hsa	hsa-miR-190a-3p	C9orf156		CEP57	ENST00000325542.5	centrosomal protein 57kDa	289			CPEB2
Details	327	100	hsa-miR-190a-3p	PREX2	phosphatidylinositol-3,4,5-trisphosphate dependent Rac exchange factor 2			MIRT515977	hsa	hsa	hsa-miR-190a-3p	AR		MBNL3	ENST00000370839.3	muscleblind-like splicing regulator 3	593			KLHL9
Details	328	100	hsa-miR-190a-3p	ELAVL4	ELAV like RNA binding protein 4			MIRT516266	hsa	hsa	hsa-miR-190a-3p	DBT		SVOPL	ENST00000288513.5	SVOP-like	5			NR3C1
Details	329	100	hsa-miR-190a-3p	PLXDC2	plexin domain containing 2			MIRT516293	hsa	hsa	hsa-miR-190a-3p	RARS2		CBWD1	ENST00000356521.4	COBW domain containing 1	5			IGF1R
Details	330	100	hsa-miR-190a-3p	L2HGDH	L-2-hydroxyglutarate dehydrogenase			MIRT516400	hsa	hsa	hsa-miR-190a-3p	FAM26E		IFNG	ENST00000229135.3	interferon, gamma	5			POT1
Details	331	100	hsa-miR-190a-3p	NAA25	N(alpha)-acetyltransferase 25, NatB auxiliary subunit			MIRT516490	hsa	hsa	hsa-miR-190a-3p	GLRX2		FAM24B	ENST00000368898.3	family with sequence similarity 24, member B	23			FBXL18
Details	332	100	hsa-miR-190a-3p	ISPD	isoprenoid synthase domain containing			MIRT516689	hsa	hsa	hsa-miR-190a-3p	ZNF675		NAT1	ENST00000307719.4	N-acetyltransferase 1 (arylamine N-acetyltransferase)	89			DUSP7
Details	333	100	hsa-miR-190a-3p	NPTN	neuroplastin			MIRT516705	hsa	hsa	hsa-miR-190a-3p	PIK3CG		LEMD3	ENST00000308330.2	LEM domain containing 3	189			EPOR
Details	334	100	hsa-miR-190a-3p	GPR82	G protein-coupled receptor 82			MIRT516758	hsa	hsa	hsa-miR-190a-3p	POT1		DEFA4	ENST00000297435.2	defensin, alpha 4, corticostatin	5			IGF2BP1
Details	335	100	hsa-miR-190a-3p	ZRANB1	zinc finger RANBP2-type containing 1			MIRT516942	hsa	hsa	hsa-miR-190a-3p	SLC35F6		ZNF726	ENST00000525354.2	zinc finger protein 726	16			ZFHX3
Details	336	100	hsa-miR-190a-3p	HOXD10	homeobox D10			MIRT517040	hsa	hsa	hsa-miR-190a-3p	ZC3H6		RP6-24A23.6	ENST00000563887.1	Uncharacterized protein	937			RAB18
Details	337	100	hsa-miR-190a-3p	GRHL3	grainyhead like transcription factor 3			MIRT517144	hsa	hsa	hsa-miR-190a-3p	VHLL		LZTS3	ENST00000329152.3	Homo sapiens leucine zipper, putative tumor suppressor family member 3 (LZTS3), transcript variant 2, mRNA.	78			ASF1A
Details	338	100	hsa-miR-190a-3p	PCF11	PCF11, cleavage and polyadenylation factor subunit			MIRT517312	hsa	hsa	hsa-miR-190a-3p	ZNF347		C1QL3	ENST00000298943.3	complement component 1, q subcomponent-like 3	77			NR2C2
Details	339	100	hsa-miR-190a-3p	ARHGEF11	Rho guanine nucleotide exchange factor 11			MIRT517351	hsa	hsa	hsa-miR-190a-3p	NLRP9		TMEM71	ENST00000356838.3	transmembrane protein 71	5			ELK4
Details	340	100	hsa-miR-190a-3p	SLITRK4	SLIT and NTRK like family member 4			MIRT517499	hsa	hsa	hsa-miR-190a-3p	GRID1		CREBZF	ENST00000398294.2	CREB/ATF bZIP transcription factor	1115			BCORL1
Details	341	100	hsa-miR-190a-3p	PRKCD	protein kinase C delta			MIRT517506	hsa	hsa	hsa-miR-190a-3p	KCNK12		TMTC1	ENST00000256062.5	transmembrane and tetratricopeptide repeat containing 1	379			SIK3
Details	342	100	hsa-miR-190a-3p	ZSWIM6	zinc finger SWIM-type containing 6			MIRT517537	hsa	hsa	hsa-miR-190a-3p	ABCF1		SPRR2F	ENST00000468739.1	small proline-rich protein 2F	5			RAPH1
Details	343	100	hsa-miR-190a-3p	TPPP	tubulin polymerization promoting protein			MIRT517551	hsa	hsa	hsa-miR-190a-3p	VENTX		MCAM	ENST00000392814.1	melanoma cell adhesion molecule	398			RECK
Details	344	100	hsa-miR-190a-3p	AKAP12	A-kinase anchoring protein 12			MIRT517623	hsa	hsa	hsa-miR-190a-3p	C10orf67		TULP3	ENST00000448120.2	tubby like protein 3	191			FAM177A1
Details	345	100	hsa-miR-190a-3p	CDON	cell adhesion associated, oncogene regulated			MIRT517697	hsa	hsa	hsa-miR-190a-3p	PPIP5K2		EVX2	ENST00000308618.4	even-skipped homeobox 2	9			YAF2
Details	346	100	hsa-miR-190a-3p	ZBTB20	zinc finger and BTB domain containing 20			MIRT518126	hsa	hsa	hsa-miR-190a-3p	XKR6		NRIP1	ENST00000400199.1	nuclear receptor interacting protein 1	342			TMEM135
Details	347	100	hsa-miR-190a-3p	ZIC5	Zic family member 5			MIRT518157	hsa	hsa	hsa-miR-190a-3p	TMEM133		SPRR2A	ENST00000392653.2	small proline-rich protein 2A	5			ZC3H12C
Details	348	100	hsa-miR-190a-3p	IRF2BP2	interferon regulatory factor 2 binding protein 2			MIRT518235	hsa	hsa	hsa-miR-190a-3p	SCIN		TRPC1	ENST00000273482.6	transient receptor potential cation channel, subfamily C, member 1	18			SERTAD2
Details	349	100	hsa-miR-190a-3p	ZNF516	zinc finger protein 516			MIRT518400	hsa	hsa	hsa-miR-190a-3p	ZNF333		XKR4	ENST00000327381.6	XK, Kell blood group complex subunit-related family, member 4	5			AASDHPPT
Details	350	100	hsa-miR-190a-3p	PPP2R5E	protein phosphatase 2 regulatory subunit B'epsilon			MIRT518441	hsa	hsa	hsa-miR-190a-3p	FRRS1		SSTR1	ENST00000267377.2	somatostatin receptor 1	28			STYX
Details	351	100	hsa-miR-190a-3p	LRP8	LDL receptor related protein 8			MIRT518501	hsa	hsa	hsa-miR-190a-3p	DEPTOR		GABRG2	ENST00000356592.3	gamma-aminobutyric acid (GABA) A receptor, gamma 2	24			MBNL2
Details	352	100	hsa-miR-190a-3p	IQSEC1	IQ motif and Sec7 domain 1			MIRT518600	hsa	hsa	hsa-miR-190a-3p	GRID2		SLC25A30	ENST00000539591.1	solute carrier family 25, member 30	92			CBX6
Details	353	100	hsa-miR-190a-3p	NUFIP2	nuclear FMR1 interacting protein 2			MIRT518616	hsa	hsa	hsa-miR-190a-3p	CAPN5		ZSWIM6	ENST00000252744.5	zinc finger, SWIM-type containing 6	933			REST
Details	354	100	hsa-miR-190a-3p	GADL1	glutamate decarboxylase like 1			MIRT518653	hsa	hsa	hsa-miR-190a-3p	SLC2A12		KCNE3	ENST00000310128.4	potassium voltage-gated channel, Isk-related family, member 3	16			L1CAM
Details	355	100	hsa-miR-190a-3p	ETV6	ETS variant 6			MIRT518661	hsa	hsa	hsa-miR-190a-3p	CLVS2		FGF20	ENST00000180166.5	fibroblast growth factor 20	5			ITPRIP
Details	356	100	hsa-miR-190a-3p	MYBL1	MYB proto-oncogene like 1			MIRT518705	hsa	hsa	hsa-miR-190a-3p	TNIP1		CD200R1	ENST00000471858.1	CD200 receptor 1	6			CAPN5
Details	357	100	hsa-miR-190a-3p	SDHAF4	succinate dehydrogenase complex assembly factor 4			MIRT518811	hsa	hsa	hsa-miR-190a-3p	AKAP8		GPR82	ENST00000302548.4	G protein-coupled receptor 82	5			ACSL4
Details	358	100	hsa-miR-190a-3p	HK3	hexokinase 3			MIRT518883	hsa	hsa	hsa-miR-190a-3p	L2HGDH		SHISA3	ENST00000319234.4	shisa family member 3	52			EMC3
Details	359	100	hsa-miR-190a-3p	DUSP7	dual specificity phosphatase 7			MIRT519001	hsa	hsa	hsa-miR-190a-3p	PCDH10		GRXCR1	ENST00000399770.2	glutaredoxin, cysteine rich 1	5			SPATA2
Details	360	100	hsa-miR-190a-3p	GPC6	glypican 6			MIRT519156	hsa	hsa	hsa-miR-190a-3p	PPP1R1A		NPTN	ENST00000345330.4	neuroplastin	2918			WDR76
Details	361	100	hsa-miR-190a-3p	SERPINE1	serpin family E member 1			MIRT519162	hsa	hsa	hsa-miR-190a-3p	CD180		PRDM1	ENST00000369089.3	PR domain containing 1, with ZNF domain	48			MIER1
Details	362	100	hsa-miR-190a-3p	APOBEC4	apolipoprotein B mRNA editing enzyme catalytic polypeptide like 4			MIRT519571	hsa	hsa	hsa-miR-190a-3p	SEMA3F		BBS7	ENST00000264499.4	Bardet-Biedl syndrome 7	173			PIK3CG
Details	363	100	hsa-miR-190a-3p	GABRB2	gamma-aminobutyric acid type A receptor beta2 subunit			MIRT519697	hsa	hsa	hsa-miR-190a-3p	ZNF609		SMOC1	ENST00000381280.4	SPARC related modular calcium binding 1	2743			DBT
Details	364	100	hsa-miR-190a-3p	RORA	RAR related orphan receptor A			MIRT519803	hsa	hsa	hsa-miR-190a-3p	ZMYM2		WNT3	ENST00000225512.5	wingless-type MMTV integration site family, member 3	46			ANKRD44
Details	365	100	hsa-miR-190a-3p	PRRX1	paired related homeobox 1			MIRT519919	hsa	hsa	hsa-miR-190a-3p	ZER1		TRUB1	ENST00000298746.3	TruB pseudouridine (psi) synthase family member 1	1035			KIAA1671
Details	366	100	hsa-miR-190a-3p	KCTD1	potassium channel tetramerization domain containing 1			MIRT519993	hsa	hsa	hsa-miR-190a-3p	ZBTB20		C1orf110	ENST00000367910.1	chromosome 1 open reading frame 110	5			WDR72
Details	367	100	hsa-miR-190a-3p	FBXO42	F-box protein 42			MIRT520004	hsa	hsa	hsa-miR-190a-3p	ZBTB16		MAGEE2	ENST00000373359.2	melanoma antigen family E, 2	5			FREM2
Details	368	100	hsa-miR-190a-3p	DIP2C	disco interacting protein 2 homolog C			MIRT520095	hsa	hsa	hsa-miR-190a-3p	XRN1		RPS13	ENST00000525634.1	ribosomal protein S13	41			ZHX3
Details	369	100	hsa-miR-190a-3p	MAP3K2	mitogen-activated protein kinase kinase kinase 2			MIRT520212	hsa	hsa	hsa-miR-190a-3p	WASL		GID8	ENST00000266069.3	GID complex subunit 8	515			MLLT3
Details	370	100	hsa-miR-190a-3p	GRHL1	grainyhead like transcription factor 1			MIRT520273	hsa	hsa	hsa-miR-190a-3p	UCHL3		CBWD2	ENST00000259199.4	COBW domain containing 2	5			ZRANB1
Details	371	100	hsa-miR-190a-3p	DLG1	discs large MAGUK scaffold protein 1			MIRT520348	hsa	hsa	hsa-miR-190a-3p	UBN2		NUMB	ENST00000554546.1	numb homolog (Drosophila)	2707			PITPNC1
Details	372	100	hsa-miR-190a-3p	TRIM13	tripartite motif containing 13			MIRT520467	hsa	hsa	hsa-miR-190a-3p	TRIM23		LYSMD3	ENST00000509384.1	LysM, putative peptidoglycan-binding, domain containing 3	92			PRKD3
Details	373	100	hsa-miR-190a-3p	RNF44	ring finger protein 44			MIRT520479	hsa	hsa	hsa-miR-190a-3p	TRIM13		XKR6	ENST00000304437.2	XK, Kell blood group complex subunit-related family, member 6	5			LMTK2
Details	374	100	hsa-miR-190a-3p	LARP4	La ribonucleoprotein domain family member 4			MIRT520589	hsa	hsa	hsa-miR-190a-3p	TMEM55B		UVRAG	ENST00000356136.3	UV radiation resistance associated	116			TRIM13
Details	375	100	hsa-miR-190a-3p	MEF2A	myocyte enhancer factor 2A			MIRT520678	hsa	hsa	hsa-miR-190a-3p	TMEM106B		CAT	ENST00000241052.4	catalase	4078			AHCYL2
Details	376	100	hsa-miR-190a-3p	SIPA1L3	signal induced proliferation associated 1 like 3			MIRT520748	hsa	hsa	hsa-miR-190a-3p	THSD7A		SUCNR1	ENST00000362032.5	succinate receptor 1	5			AKAP8
Details	377	100	hsa-miR-190a-3p	MCAM	melanoma cell adhesion molecule			MIRT520783	hsa	hsa	hsa-miR-190a-3p	TBX18		HPCAL1	ENST00000381765.3	hippocalcin-like 1	233			TMX4
Details	378	100	hsa-miR-190a-3p	NRIP1	nuclear receptor interacting protein 1			MIRT520829	hsa	hsa	hsa-miR-190a-3p	SYP		TMEM170B	ENST00000379426.1	transmembrane protein 170B	489			SIKE1
Details	379	100	hsa-miR-190a-3p	CACNA1I	calcium voltage-gated channel subunit alpha1 I			MIRT521040	hsa	hsa	hsa-miR-190a-3p	SLC30A4		RSRC1	ENST00000464171.1	arginine/serine-rich coiled-coil 1	642			NEDD4L
Details	380	100	hsa-miR-190a-3p	RANBP10	RAN binding protein 10			MIRT521120	hsa	hsa	hsa-miR-190a-3p	SIPA1L3		TPTE	ENST00000298232.7	transmembrane phosphatase with tensin homology	5			UBE2K
Details	381	100	hsa-miR-190a-3p	PRDM1	PR/SET domain 1			MIRT521258	hsa	hsa	hsa-miR-190a-3p	RUNX1T1		MRPL42	ENST00000549982.1	mitochondrial ribosomal protein L42	1172			TRAF6
Details	382	100	hsa-miR-190a-3p	SLITRK3	SLIT and NTRK like family member 3			MIRT521410	hsa	hsa	hsa-miR-190a-3p	RC3H1		APOBEC4	ENST00000308641.4	apolipoprotein B mRNA editing enzyme, catalytic polypeptide-like 4 (putative)	5			PIAS1
Details	383	100	hsa-miR-190a-3p	ASB11	ankyrin repeat and SOCS box containing 11			MIRT521427	hsa	hsa	hsa-miR-190a-3p	RBBP9		NFU1	ENST00000410022.2	NFU1 iron-sulfur cluster scaffold homolog (S. cerevisiae)	2548			NLK
Details	384	100	hsa-miR-190a-3p	FOXF1	forkhead box F1			MIRT521785	hsa	hsa	hsa-miR-190a-3p	PPARGC1A		ZSWIM2	ENST00000295131.2	zinc finger, SWIM-type containing 2	5			AGPS
Details	385	100	hsa-miR-190a-3p	PHACTR2	phosphatase and actin regulator 2			MIRT521854	hsa	hsa	hsa-miR-190a-3p	PLRG1		AKT3	ENST00000366539.1	v-akt murine thymoma viral oncogene homolog 3	168			SLAIN2
Details	386	100	hsa-miR-190a-3p	IFNAR1	interferon alpha and beta receptor subunit 1			MIRT521880	hsa	hsa	hsa-miR-190a-3p	PITPNC1		C6orf211	ENST00000367294.3	chromosome 6 open reading frame 211	65			WDTC1
Details	387	100	hsa-miR-190a-3p	MYADM	myeloid associated differentiation marker			MIRT521896	hsa	hsa	hsa-miR-190a-3p	PIAS1		NDUFC1	ENST00000394228.1	NADH dehydrogenase (ubiquinone) 1, subcomplex unknown, 1, 6kDa	84			GRID1
Details	388	100	hsa-miR-190a-3p	SCAMP5	secretory carrier membrane protein 5			MIRT521917	hsa	hsa	hsa-miR-190a-3p	PHIP		HESX1	ENST00000295934.3	HESX homeobox 1	58			RAB3GAP1
Details	389	99	hsa-miR-190a-3p	SPSB1	splA/ryanodine receptor domain and SOCS box containing 1			MIRT521926	hsa	hsa	hsa-miR-190a-3p	PHF8		FAM111B	ENST00000411426.1	family with sequence similarity 111, member B	39			ABHD13
Details	390	99	hsa-miR-190a-3p	SNX1	sorting nexin 1			MIRT521969	hsa	hsa	hsa-miR-190a-3p	PHACTR2		SPRR2D	ENST00000360379.3	small proline-rich protein 2D	5			EFHC1
Details	391	99	hsa-miR-190a-3p	FIGN	fidgetin, microtubule severing factor			MIRT521978	hsa	hsa	hsa-miR-190a-3p	PEX5L		PJA2	ENST00000361189.2	praja ring finger 2, E3 ubiquitin protein ligase	220			CCAR2
Details	392	99	hsa-miR-190a-3p	BDP1	B double prime 1, subunit of RNA polymerase III transcription initiation factor IIIB			MIRT521996	hsa	hsa	hsa-miR-190a-3p	PDCD10		RASSF6	ENST00000307439.5	Ras association (RalGDS/AF-6) domain family member 6	11			BCOR
Details	393	99	hsa-miR-190a-3p	FZD1	frizzled class receptor 1			MIRT522010	hsa	hsa	hsa-miR-190a-3p	PCGF2		SF1	ENST00000377390.3	splicing factor 1	17473			CD81
Details	394	99	hsa-miR-190a-3p	45358	membrane associated ring-CH-type finger 7			MIRT522032	hsa	hsa	hsa-miR-190a-3p	PAPSS2		RP11-268J15.5	ENST00000373137.2		141			SEC23IP
Details	395	99	hsa-miR-190a-3p	NTN4	netrin 4			MIRT522120	hsa	hsa	hsa-miR-190a-3p	NELL2		SPRYD7	ENST00000361840.3	SPRY domain containing 7	863			USP25
Details	396	99	hsa-miR-190a-3p	TMEM69	transmembrane protein 69			MIRT522254	hsa	hsa	hsa-miR-190a-3p	NLK		ZNF567	ENST00000536254.2	zinc finger protein 567	1031			PLEKHA6
Details	397	99	hsa-miR-190a-3p	OSBPL3	oxysterol binding protein like 3			MIRT522312	hsa	hsa	hsa-miR-190a-3p	NFIC		ASIP	ENST00000374954.3	agouti signaling protein	5			TNFRSF9
Details	398	99	hsa-miR-190a-3p	EFHC1	EF-hand domain containing 1			MIRT522393	hsa	hsa	hsa-miR-190a-3p	MYADM		PIGZ	ENST00000412723.1	phosphatidylinositol glycan anchor biosynthesis, class Z	1071			PRPF40A
Details	399	99	hsa-miR-190a-3p	CEP104	centrosomal protein 104			MIRT522459	hsa	hsa	hsa-miR-190a-3p	MMP16		SLITRK3	ENST00000475390.1	SLIT and NTRK-like family, member 3	5			TMEM106B
Details	400	99	hsa-miR-190a-3p	ATXN3	ataxin 3			MIRT522567	hsa	hsa	hsa-miR-190a-3p	MBTD1		TAGLN2	ENST00000368096.1	transgelin 2	2192			ZDHHC5
Details	401	99	hsa-miR-190a-3p	GSR	glutathione-disulfide reductase			MIRT522656	hsa	hsa	hsa-miR-190a-3p	MAN1A2		RANBP3L	ENST00000296604.3	RAN binding protein 3-like	5			SLC2A12
Details	402	99	hsa-miR-190a-3p	FBXL20	F-box and leucine rich repeat protein 20			MIRT522717	hsa	hsa	hsa-miR-190a-3p	LRRC55		UBE2E1	ENST00000306627.3	ubiquitin-conjugating enzyme E2E 1	3195			RAB3B
Details	403	99	hsa-miR-190a-3p	NUP98	nucleoporin 98			MIRT522732	hsa	hsa	hsa-miR-190a-3p	LRP8		IL1B	ENST00000263341.2	interleukin 1, beta	5			GTF2B
Details	404	99	hsa-miR-190a-3p	CDKL5	cyclin dependent kinase like 5			MIRT522813	hsa	hsa	hsa-miR-190a-3p	KLHL9		FBXO9	ENST00000244426.6	F-box protein 9	904			FGFBP3
Details	405	99	hsa-miR-190a-3p	BVES	blood vessel epicardial substance			MIRT522832	hsa	hsa	hsa-miR-190a-3p	KLF7		VASN	ENST00000304735.3	vasorin	192			SSPN
Details	406	99	hsa-miR-190a-3p	MSI2	musashi RNA binding protein 2			MIRT522839	hsa	hsa	hsa-miR-190a-3p	KIAA2022		ZNF429	ENST00000358491.4	zinc finger protein 429	23			DDX52
Details	407	99	hsa-miR-190a-3p	TRMT9B	tRNA methyltransferase 9B (putative)			MIRT522892	hsa	hsa	hsa-miR-190a-3p	KCNN3		MTAP	ENST00000380172.4	methylthioadenosine phosphorylase	1575			WEE1
Details	408	99	hsa-miR-190a-3p	COBLL1	cordon-bleu WH2 repeat protein like 1			MIRT522979	hsa	hsa	hsa-miR-190a-3p	INTU		IFRG15	ENST00000553856.1	Homo sapiens torsin A interacting protein 2 (TOR1AIP2), transcript variant 1, mRNA.	482			EPM2AIP1
Details	409	99	hsa-miR-190a-3p	RIOK2	RIO kinase 2			MIRT523040	hsa	hsa	hsa-miR-190a-3p	IGF1		TFAP2D	ENST00000008391.3	transcription factor AP-2 delta (activating enhancer binding protein 2 delta)	5			FZD5
Details	410	99	hsa-miR-190a-3p	FAM117B	family with sequence similarity 117 member B			MIRT523369	hsa	hsa	hsa-miR-190a-3p	GSR		FAM3C	ENST00000359943.3	family with sequence similarity 3, member C	15			HMGB2
Details	411	99	hsa-miR-190a-3p	MEF2C	myocyte enhancer factor 2C			MIRT523387	hsa	hsa	hsa-miR-190a-3p	GRIN2B		C4orf33	ENST00000281146.5	chromosome 4 open reading frame 33	18			TMCO1
Details	412	99	hsa-miR-190a-3p	AZIN1	antizyme inhibitor 1			MIRT523395	hsa	hsa	hsa-miR-190a-3p	GRIK3		CADM4	ENST00000222374.2	cell adhesion molecule 4	50			CTLA4
Details	413	99	hsa-miR-190a-3p	TSNARE1	t-SNARE domain containing 1			MIRT523406	hsa	hsa	hsa-miR-190a-3p	GRAMD1B		NDC80	ENST00000261597.4	NDC80 kinetochore complex component	630			CADM1
Details	414	99	hsa-miR-190a-3p	DIO2	iodothyronine deiodinase 2			MIRT523589	hsa	hsa	hsa-miR-190a-3p	FZD5		FBXO42	ENST00000375592.3	F-box protein 42	854			DOCK7
Details	415	99	hsa-miR-190a-3p	FLI1	Fli-1 proto-oncogene, ETS transcription factor			MIRT523745	hsa	hsa	hsa-miR-190a-3p	FBXO9		GCOM1	ENST00000380568.3	GRINL1A complex locus 1	21			SH3TC2
Details	416	99	hsa-miR-190a-3p	PTPRK	protein tyrosine phosphatase, receptor type K			MIRT523753	hsa	hsa	hsa-miR-190a-3p	FBXO48		MBNL1	ENST00000357472.3	muscleblind-like splicing regulator 1	135			PCBP2
Details	417	99	hsa-miR-190a-3p	SPACA9	sperm acrosome associated 9			MIRT523808	hsa	hsa	hsa-miR-190a-3p	FAM19A1		CXXC5	ENST00000302517.3	CXXC finger protein 5	1285			CSMD1
Details	418	99	hsa-miR-190a-3p	CCN2	cellular communication network factor 2			MIRT523886	hsa	hsa	hsa-miR-190a-3p	EPHA5		PGBD4	ENST00000397766.2	piggyBac transposable element derived 4	136			RAB5B
Details	419	99	hsa-miR-190a-3p	CLEC2D	C-type lectin domain family 2 member D			MIRT524027	hsa	hsa	hsa-miR-190a-3p	DOCK4		RABGAP1	ENST00000373647.4	RAB GTPase activating protein 1	514			LRP8
Details	420	99	hsa-miR-190a-3p	FRMPD3	FERM and PDZ domain containing 3			MIRT524090	hsa	hsa	hsa-miR-190a-3p	DNAJB14		RGS13	ENST00000391995.2	regulator of G-protein signaling 13	5
Details	421	99	hsa-miR-190a-3p	RASAL2	RAS protein activator like 2			MIRT524211	hsa	hsa	hsa-miR-190a-3p	DDI2		ZNF552	ENST00000391701.1	zinc finger protein 552	9
Details	422	99	hsa-miR-190a-3p	NAA15	N(alpha)-acetyltransferase 15, NatA auxiliary subunit			MIRT524413	hsa	hsa	hsa-miR-190a-3p	CNOT6L		CHDC2	ENST00000313548.4	calponin homology domain containing 2	5
Details	423	99	hsa-miR-190a-3p	PTPRB	protein tyrosine phosphatase, receptor type B			MIRT524473	hsa	hsa	hsa-miR-190a-3p	CHRM3		CREBRF	ENST00000540014.1	CREB3 regulatory factor	24
Details	424	99	hsa-miR-190a-3p	LSM12	LSM12 homolog			MIRT524565	hsa	hsa	hsa-miR-190a-3p	CALML4		CHI3L2	ENST00000524472.1	chitinase 3-like 2	5
Details	425	99	hsa-miR-190a-3p	CASZ1	castor zinc finger 1			MIRT524655	hsa	hsa	hsa-miR-190a-3p	C1orf50		MBTD1	ENST00000586178.1	mbt domain containing 1	113
Details	426	99	hsa-miR-190a-3p	NEGR1	neuronal growth regulator 1			MIRT524726	hsa	hsa	hsa-miR-190a-3p	BRI3BP		ESRRA	ENST00000405666.1	estrogen-related receptor alpha	18
Details	427	99	hsa-miR-190a-3p	XKR6	XK related 6			MIRT524825	hsa	hsa	hsa-miR-190a-3p	ARSJ		SLC35A1	ENST00000369557.5	solute carrier family 35 (CMP-sialic acid transporter), member A1	671
Details	428	99	hsa-miR-190a-3p	VASN	vasorin			MIRT524894	hsa	hsa	hsa-miR-190a-3p	ANKRD44		MRPL17	ENST00000288937.6	mitochondrial ribosomal protein L17	1447
Details	429	99	hsa-miR-190a-3p	TMEM170B	transmembrane protein 170B			MIRT524913	hsa	hsa	hsa-miR-190a-3p	AMD1		VASP	ENST00000245932.6	vasodilator-stimulated phosphoprotein	1627
Details	430	99	hsa-miR-190a-3p	MID1	midline 1			MIRT524945	hsa	hsa	hsa-miR-190a-3p	AKAP10		OSBP2	ENST00000382310.3	oxysterol binding protein 2	485
Details	431	99	hsa-miR-190a-3p	TFAP2D	transcription factor AP-2 delta			MIRT526054	hsa	hsa	hsa-miR-190a-3p	CBR1		PTER	ENST00000378000.1	phosphotriesterase related	217
Details	432	99	hsa-miR-190a-3p	PLAGL1	PLAG1 like zinc finger 1			MIRT527131	hsa	hsa	hsa-miR-190a-3p	GULP1		TSNAX	ENST00000366639.4	translin-associated factor X	936
Details	433	99	hsa-miR-190a-3p	KIAA0754	KIAA0754			MIRT528258	hsa	hsa	hsa-miR-190a-3p	GPRIN2		DHX40	ENST00000251241.4	DEAH (Asp-Glu-Ala-His) box polypeptide 40	538
Details	434	99	hsa-miR-190a-3p	IKZF4	IKAROS family zinc finger 4			MIRT528424	hsa	hsa	hsa-miR-190a-3p	CERCAM		ZNF608	ENST00000504926.1	zinc finger protein 608	22
Details	435	99	hsa-miR-190a-3p	COL4A5	collagen type IV alpha 5 chain			MIRT530029	hsa	hsa	hsa-miR-190a-3p	ZNF354B		RGS1	ENST00000367459.3	regulator of G-protein signaling 1	5
Details	436	99	hsa-miR-190a-3p	GRID2	glutamate ionotropic receptor delta type subunit 2			MIRT530091	hsa	hsa	hsa-miR-190a-3p	SHISA2		EFR3A	ENST00000254624.5	EFR3 homolog A (S. cerevisiae)	372
Details	437	99	hsa-miR-190a-3p	CLDN1	claudin 1			MIRT530350	hsa	hsa	hsa-miR-190a-3p	HPSE		C18orf21	ENST00000592875.1	chromosome 18 open reading frame 21	410
Details	438	99	hsa-miR-190a-3p	MBNL1	muscleblind like splicing regulator 1			MIRT530524	hsa	hsa	hsa-miR-190a-3p	ALG10B		EBLN1	ENST00000422359.2	endogenous Bornavirus-like nucleoprotein 1	5
Details	439	99	hsa-miR-190a-3p	NEUROD1	neuronal differentiation 1			MIRT532394	hsa	hsa	hsa-miR-190a-3p	SNX3		AC010327.2	ENST00000598855.1	Uncharacterized protein; cDNA FLJ45856 fis, clone OCBBF2025631	7
Details	440	99	hsa-miR-190a-3p	MLLT3	MLLT3, super elongation complex subunit			MIRT533759	hsa	hsa	hsa-miR-190a-3p	TMEM135		PANK4	ENST00000378466.3	pantothenate kinase 4	72
Details	441	99	hsa-miR-190a-3p	FNDC3B	fibronectin type III domain containing 3B			MIRT534195	hsa	hsa	hsa-miR-190a-3p	SLC7A11		KIAA1109	ENST00000388738.3	KIAA1109	591
Details	442	99	hsa-miR-190a-3p	WDR72	WD repeat domain 72			MIRT535001	hsa	hsa	hsa-miR-190a-3p	PRPF40A		SLC2A13	ENST00000280871.4	solute carrier family 2 (facilitated glucose transporter), member 13	47
Details	443	99	hsa-miR-190a-3p	INPP4A	inositol polyphosphate-4-phosphatase type I A			MIRT535127	hsa	hsa	hsa-miR-190a-3p	PLK2		ATF1	ENST00000262053.3	activating transcription factor 1	1599
Details	444	99	hsa-miR-190a-3p	SVIP	small VCP interacting protein			MIRT535923	hsa	hsa	hsa-miR-190a-3p	MIER1		FGFR3	ENST00000340107.4	fibroblast growth factor receptor 3	1085
Details	445	99	hsa-miR-190a-3p	SERTAD2	SERTA domain containing 2			MIRT536877	hsa	hsa	hsa-miR-190a-3p	HIVEP1		CACNB4	ENST00000539935.1	calcium channel, voltage-dependent, beta 4 subunit	57
Details	446	99	hsa-miR-190a-3p	PEX3	peroxisomal biogenesis factor 3			MIRT538278	hsa	hsa	hsa-miR-190a-3p	CTGF		RP11-182J1.16	ENST00000558195.1	uncharacterized protein LOC100505679	5
Details	447	99	hsa-miR-190a-3p	SLC2A12	solute carrier family 2 member 12			MIRT538937	hsa	hsa	hsa-miR-190a-3p	BMPR1A		SPRR2B	ENST00000368755.2	small proline-rich protein 2B	5
Details	448	99	hsa-miR-190a-3p	FAM107B	family with sequence similarity 107 member B			MIRT539582	hsa	hsa	hsa-miR-190a-3p	ZNF556		MMP16	ENST00000286614.6	matrix metallopeptidase 16 (membrane-inserted)	12
Details	449	99	hsa-miR-190a-3p	TENT4B	terminal nucleotidyltransferase 4B			MIRT539723	hsa	hsa	hsa-miR-190a-3p	DNAH10OS		RBBP9	ENST00000337227.4	retinoblastoma binding protein 9	102
Details	450	99	hsa-miR-190a-3p	CCL11	C-C motif chemokine ligand 11			MIRT540011	hsa	hsa	hsa-miR-190a-3p	LILRB2		PTBP2	ENST00000609116.1	polypyrimidine tract binding protein 2	70
Details	451	99	hsa-miR-190a-3p	MAGEL2	MAGE family member L2			MIRT540653	hsa	hsa	hsa-miR-190a-3p	NLRP8		ZNF431	ENST00000311048.7	zinc finger protein 431	93
Details	452	99	hsa-miR-190a-3p	WNT5A	Wnt family member 5A			MIRT540769	hsa	hsa	hsa-miR-190a-3p	TBRG4		ATP6V0E2	ENST00000425642.2	ATPase, H+ transporting V0 subunit e2	85
Details	453	99	hsa-miR-190a-3p	TCF20	transcription factor 20			MIRT540819	hsa	hsa	hsa-miR-190a-3p	SSPN		EIF3D	ENST00000216190.8	eukaryotic translation initiation factor 3, subunit D	5812
Details	454	99	hsa-miR-190a-3p	ZFHX3	zinc finger homeobox 3			MIRT541075	hsa	hsa	hsa-miR-190a-3p	SAMD12		CACYBP	ENST00000367681.2	calcyclin binding protein	374
Details	455	99	hsa-miR-190a-3p	SGMS2	sphingomyelin synthase 2			MIRT541521	hsa	hsa	hsa-miR-190a-3p	MGAT4C		CMAS	ENST00000229329.2	cytidine monophosphate N-acetylneuraminic acid synthetase	444
Details	456	99	hsa-miR-190a-3p	CCDC102A	coiled-coil domain containing 102A			MIRT541578	hsa	hsa	hsa-miR-190a-3p	PELP1		LYSMD2	ENST00000267838.3	LysM, putative peptidoglycan-binding, domain containing 2	307
Details	457	99	hsa-miR-190a-3p	NFAT5	nuclear factor of activated T cells 5			MIRT541695	hsa	hsa	hsa-miR-190a-3p	TTC39B		IQCJ	ENST00000482126.1	IQ motif containing J	5
Details	458	99	hsa-miR-190a-3p	MGAT4A	alpha-1,3-mannosyl-glycoprotein 4-beta-N-acetylglucosaminyltransferase A			MIRT541834	hsa	hsa	hsa-miR-190a-3p	CDON		CLDN14	ENST00000399139.1	claudin 14	121
Details	459	99	hsa-miR-190a-3p	CNTNAP1	contactin associated protein 1			MIRT542103	hsa	hsa	hsa-miR-190a-3p	PPP2R5E		ARHGEF7	ENST00000426073.2	Rho guanine nucleotide exchange factor (GEF) 7	361
Details	460	99	hsa-miR-190a-3p	HSD17B7	hydroxysteroid 17-beta dehydrogenase 7			MIRT542161	hsa	hsa	hsa-miR-190a-3p	ROCK2		EVI2B	ENST00000330927.4	ecotropic viral integration site 2B	5
Details	461	99	hsa-miR-190a-3p	CD2AP	CD2 associated protein			MIRT542484	hsa	hsa	hsa-miR-190a-3p	OBFC1		HILPDA	ENST00000257696.4	hypoxia inducible lipid droplet-associated	431
Details	462	99	hsa-miR-190a-3p	PCDH8	protocadherin 8			MIRT542624	hsa	hsa	hsa-miR-190a-3p	WEE1		N4BP2L1	ENST00000380139.4	NEDD4 binding protein 2-like 1	92
Details	463	99	hsa-miR-190a-3p	MAST4	microtubule associated serine/threonine kinase family member 4			MIRT542802	hsa	hsa	hsa-miR-190a-3p	PLAG1		PLN	ENST00000357525.5	phospholamban	5
Details	464	99	hsa-miR-190a-3p	ATRX	ATRX, chromatin remodeler			MIRT542883	hsa	hsa	hsa-miR-190a-3p	MAPK6		OGN	ENST00000262551.4	osteoglycin	5
Details	465	99	hsa-miR-190a-3p	CXXC5	CXXC finger protein 5			MIRT543038	hsa	hsa	hsa-miR-190a-3p	BCORL1		PKHD1L1	ENST00000378402.5	polycystic kidney and hepatic disease 1 (autosomal recessive)-like 1	8
Details	466	99	hsa-miR-190a-3p	SV2B	synaptic vesicle glycoprotein 2B			MIRT543637	hsa	hsa	hsa-miR-190a-3p	CNTNAP5		GTF2H1	ENST00000265963.4	general transcription factor IIH, polypeptide 1, 62kDa	121
Details	467	99	hsa-miR-190a-3p	KIAA1109	KIAA1109			MIRT543843	hsa	hsa	hsa-miR-190a-3p	APIP		AC016559.1	ENST00000594347.1	Uncharacterized protein	15
Details	468	99	hsa-miR-190a-3p	ARSJ	arylsulfatase family member J			MIRT543975	hsa	hsa	hsa-miR-190a-3p	PRR23A		KIAA0100	ENST00000528896.2	KIAA0100	12
Details	469	99	hsa-miR-190a-3p	ARHGAP24	Rho GTPase activating protein 24			MIRT543984	hsa	hsa	hsa-miR-190a-3p	OSBP2		ANKRD49	ENST00000544253.1	ankyrin repeat domain 49	32
Details	470	99	hsa-miR-190a-3p	AKT3	AKT serine/threonine kinase 3			MIRT544125	hsa	hsa	hsa-miR-190a-3p	PPIL1		HRK	ENST00000257572.5	harakiri, BCL2 interacting protein (contains only BH3 domain)	19
Details	471	99	hsa-miR-190a-3p	RGL1	ral guanine nucleotide dissociation stimulator like 1			MIRT544305	hsa	hsa	hsa-miR-190a-3p	TAGLN2		SNX1	ENST00000353874.4	sorting nexin 1	1296
Details	472	99	hsa-miR-190a-3p	PDE10A	phosphodiesterase 10A			MIRT544416	hsa	hsa	hsa-miR-190a-3p	ZNF460		VGLL2	ENST00000352536.3	vestigial like 2 (Drosophila)	5
Details	473	99	hsa-miR-190a-3p	GTF2H1	general transcription factor IIH subunit 1			MIRT544882	hsa	hsa	hsa-miR-190a-3p	SGPP2		FAM122B	ENST00000370790.1	family with sequence similarity 122B	334
Details	474	99	hsa-miR-190a-3p	KRT222	keratin 222			MIRT544956	hsa	hsa	hsa-miR-190a-3p	IRS1		PAIP1	ENST00000514514.1	poly(A) binding protein interacting protein 1	165
Details	475	99	hsa-miR-190a-3p	UGCG	UDP-glucose ceramide glucosyltransferase			MIRT545004	hsa	hsa	hsa-miR-190a-3p	C15orf40		NKAIN3	ENST00000523211.1	Na+/K+ transporting ATPase interacting 3	5
Details	476	99	hsa-miR-190a-3p	RBBP9	RB binding protein 9, serine hydrolase			MIRT545024	hsa	hsa	hsa-miR-190a-3p	PLP1		UBE2W	ENST00000517608.1	ubiquitin-conjugating enzyme E2W (putative)	102
Details	477	99	hsa-miR-190a-3p	CABP7	calcium binding protein 7			MIRT545079	hsa	hsa	hsa-miR-190a-3p	TSEN34		CDK1	ENST00000395284.3	cyclin-dependent kinase 1	3029
Details	478	99	hsa-miR-190a-3p	TAOK1	TAO kinase 1			MIRT545148	hsa	hsa	hsa-miR-190a-3p	GABRG1		RAD51C	ENST00000421782.2	RAD51 paralog C	1349
Details	479	99	hsa-miR-190a-3p	ZEB2	zinc finger E-box binding homeobox 2			MIRT545268	hsa	hsa	hsa-miR-190a-3p	ZNF551		LIN7C	ENST00000278193.2	lin-7 homolog C (C. elegans)	1701
Details	480	99	hsa-miR-190a-3p	FGL2	fibrinogen like 2			MIRT545462	hsa	hsa	hsa-miR-190a-3p	SLC12A2		CYSLTR1	ENST00000373304.3	cysteinyl leukotriene receptor 1	5
Details	481	99	hsa-miR-190a-3p	SRCIN1	SRC kinase signaling inhibitor 1			MIRT545528	hsa	hsa	hsa-miR-190a-3p	NEDD4L		KCNJ6	ENST00000609713.1	potassium inwardly-rectifying channel, subfamily J, member 6	5
Details	482	99	hsa-miR-190a-3p	LIN7C	lin-7 homolog C, crumbs cell polarity complex component			MIRT545732	hsa	hsa	hsa-miR-190a-3p	SNRPD3		PCGF2	ENST00000360797.2	polycomb group ring finger 2	545
Details	483	99	hsa-miR-190a-3p	TNFRSF9	TNF receptor superfamily member 9			MIRT546375	hsa	hsa	hsa-miR-190a-3p	STOX2		ITPRIPL1	ENST00000536814.1	inositol 1,4,5-trisphosphate receptor interacting protein-like 1	131
Details	484	99	hsa-miR-190a-3p	CYP2B6	cytochrome P450 family 2 subfamily B member 6			MIRT546791	hsa	hsa	hsa-miR-190a-3p	RBM7		GRHL1	ENST00000405379.2	grainyhead-like 1 (Drosophila)	147
Details	485	99	hsa-miR-190a-3p	TRIM55	tripartite motif containing 55			MIRT547362	hsa	hsa	hsa-miR-190a-3p	MSI2		SLCO1B3	ENST00000261196.2	solute carrier organic anion transporter family, member 1B3	119
Details	486	99	hsa-miR-190a-3p	KLHL14	kelch like family member 14			MIRT547599	hsa	hsa	hsa-miR-190a-3p	LIN28B		SLC25A32	ENST00000297578.4	solute carrier family 25 (mitochondrial folate carrier), member 32	554
Details	487	99	hsa-miR-190a-3p	RBL1	RB transcriptional corepressor like 1			MIRT547916	hsa	hsa	hsa-miR-190a-3p	HNRNPU		ALG13	ENST00000371979.3	ALG13, UDP-N-acetylglucosaminyltransferase subunit	612
Details	488	99	hsa-miR-190a-3p	DENND4A	DENN domain containing 4A			MIRT548242	hsa	hsa	hsa-miR-190a-3p	FBXW7		UBE2A	ENST00000371558.2	ubiquitin-conjugating enzyme E2A	618
Details	489	99	hsa-miR-190a-3p	SON	SON DNA binding protein			MIRT548642	hsa	hsa	hsa-miR-190a-3p	DAPK1		UGCG	ENST00000374279.3	UDP-glucose ceramide glucosyltransferase	1200
Details	490	99	hsa-miR-190a-3p	PRDM5	PR/SET domain 5			MIRT548715	hsa	hsa	hsa-miR-190a-3p	CRK		PLAG1	ENST00000316981.3	pleiomorphic adenoma gene 1	58
Details	491	99	hsa-miR-190a-3p	NEMF	nuclear export mediator factor			MIRT549238	hsa	hsa	hsa-miR-190a-3p	ATXN3		ZSWIM8	ENST00000604524.1	zinc finger, SWIM-type containing 8	36
Details	492	99	hsa-miR-190a-3p	MSX2	msh homeobox 2			MIRT549282	hsa	hsa	hsa-miR-190a-3p	ASH1L		AGFG2	ENST00000262935.4	ArfGAP with FG repeats 2	3985
Details	493	99	hsa-miR-190a-3p	GABRB3	gamma-aminobutyric acid type A receptor beta3 subunit			MIRT549723	hsa	hsa	hsa-miR-190a-3p	NUP37		FAM47E-STBD1	ENST00000237642.6	FAM47E-STBD1 readthrough	503
Details	494	99	hsa-miR-190a-3p	TEC	tec protein tyrosine kinase			MIRT549744	hsa	hsa	hsa-miR-190a-3p	RHCG		HIST1H2BF	ENST00000359985.1	histone cluster 1, H2bf	16
Details	495	99	hsa-miR-190a-3p	KIAA1522	KIAA1522			MIRT549778	hsa	hsa	hsa-miR-190a-3p	FAR2		KRT222	ENST00000394052.3	keratin 222	9
Details	496	99	hsa-miR-190a-3p	FAM135B	family with sequence similarity 135 member B			MIRT549891	hsa	hsa	hsa-miR-190a-3p	LINC00955		BHLHE40	ENST00000256495.3	basic helix-loop-helix family, member e40	1571
Details	497	99	hsa-miR-190a-3p	GRIK3	glutamate ionotropic receptor kainate type subunit 3			MIRT550165	hsa	hsa	hsa-miR-190a-3p	CLEC12A		HSPB3	ENST00000302005.1	heat shock 27kDa protein 3	5
Details	498	99	hsa-miR-190a-3p	IQCH	IQ motif containing H			MIRT550178	hsa	hsa	hsa-miR-190a-3p	TMEM106C		DCLRE1C	ENST00000378289.4	DNA cross-link repair 1C	29
Details	499	99	hsa-miR-190a-3p	OSBP	oxysterol binding protein			MIRT550284	hsa	hsa	hsa-miR-190a-3p	APOL6		SLC25A27	ENST00000371347.5	solute carrier family 25, member 27	85
Details	500	99	hsa-miR-190a-3p	BAZ2B	bromodomain adjacent to zinc finger domain 2B			MIRT550322	hsa	hsa	hsa-miR-190a-3p	SMAD9		YBX3	ENST00000279550.7	Y box binding protein 3	631
Details	501	99	hsa-miR-190a-3p	VASP	vasodilator stimulated phosphoprotein			MIRT550373	hsa	hsa	hsa-miR-190a-3p	MYLK3		BLOC1S5	ENST00000397457.2	biogenesis of lysosomal organelles complex-1, subunit 5, muted	187
Details	502	99	hsa-miR-190a-3p	MALT1	MALT1 paracaspase			MIRT550389	hsa	hsa	hsa-miR-190a-3p	TBX4		FMO4	ENST00000367749.3	flavin containing monooxygenase 4	7
Details	503	99	hsa-miR-190a-3p	EFR3A	EFR3 homolog A			MIRT550511	hsa	hsa	hsa-miR-190a-3p	PLCXD1		COA5	ENST00000328709.3	cytochrome c oxidase assembly factor 5	72
Details	504	99	hsa-miR-190a-3p	MS4A7	membrane spanning 4-domains A7			MIRT550698	hsa	hsa	hsa-miR-190a-3p	APOOL		CRB3	ENST00000598494.1	crumbs homolog 3 (Drosophila)	5
Details	505	99	hsa-miR-190a-3p	STK4	serine/threonine kinase 4			MIRT550738	hsa	hsa	hsa-miR-190a-3p	OPN5		DCLK1	ENST00000379892.4	doublecortin-like kinase 1	9
Details	506	99	hsa-miR-190a-3p	LSAMP	limbic system associated membrane protein			MIRT550802	hsa	hsa	hsa-miR-190a-3p	FAM229B		HSPA9	ENST00000297185.3	heat shock 70kDa protein 9 (mortalin)	573
Details	507	99	hsa-miR-190a-3p	PAIP1	poly(A) binding protein interacting protein 1			MIRT551079	hsa	hsa	hsa-miR-190a-3p	DDX52		RNF6	ENST00000346166.3	ring finger protein (C3H2C3 type) 6	47
Details	508	99	hsa-miR-190a-3p	MXRA5	matrix remodeling associated 5			MIRT551173	hsa	hsa	hsa-miR-190a-3p	ATP7A		IGIP	ENST00000333305.3	IgA-inducing protein	46
Details	509	98	hsa-miR-190a-3p	GATAD2B	GATA zinc finger domain containing 2B			MIRT551256	hsa	hsa	hsa-miR-190a-3p	OPCML		RERG	ENST00000256953.2	RAS-like, estrogen-regulated, growth inhibitor	162
Details	510	98	hsa-miR-190a-3p	NDUFB3	NADH:ubiquinone oxidoreductase subunit B3			MIRT551360	hsa	hsa	hsa-miR-190a-3p	EPM2AIP1		RAB11FIP3	ENST00000262305.4	RAB11 family interacting protein 3 (class II)	71
Details	511	98	hsa-miR-190a-3p	MYCN	MYCN proto-oncogene, bHLH transcription factor			MIRT551426	hsa	hsa	hsa-miR-190a-3p	GIMAP7		CSRNP3	ENST00000314499.7	cysteine-serine-rich nuclear protein 3	24
Details	512	98	hsa-miR-190a-3p	ARHGEF12	Rho guanine nucleotide exchange factor 12			MIRT551609	hsa	hsa	hsa-miR-190a-3p	ZNF267		IMPG2	ENST00000193391.7	interphotoreceptor matrix proteoglycan 2	5
Details	513	98	hsa-miR-190a-3p	SPRY4	sprouty RTK signaling antagonist 4			MIRT551644	hsa	hsa	hsa-miR-190a-3p	CCDC127		TSNARE1	ENST00000519651.1	t-SNARE domain containing 1	11
Details	514	98	hsa-miR-190a-3p	KIF11	kinesin family member 11			MIRT551809	hsa	hsa	hsa-miR-190a-3p	C4orf33		CNTNAP1	ENST00000264638.4	contactin associated protein 1	821
Details	515	98	hsa-miR-190a-3p	STXBP5	syntaxin binding protein 5			MIRT551812	hsa	hsa	hsa-miR-190a-3p	LDHAL6A		C18orf8	ENST00000269221.3	chromosome 18 open reading frame 8	23
Details	516	98	hsa-miR-190a-3p	MBNL2	muscleblind like splicing regulator 2			MIRT551868	hsa	hsa	hsa-miR-190a-3p	TMEM47		KCNN2	ENST00000512097.3	potassium intermediate/small conductance calcium-activated channel, subfamily N, member 2	5
Details	517	98	hsa-miR-190a-3p	MFSD8	major facilitator superfamily domain containing 8			MIRT551877	hsa	hsa	hsa-miR-190a-3p	EPHA1		PPP4R2	ENST00000356692.5	protein phosphatase 4, regulatory subunit 2	310
Details	518	98	hsa-miR-190a-3p	DMAC1	distal membrane arm assembly complex 1			MIRT552067	hsa	hsa	hsa-miR-190a-3p	RAB11FIP3		NCAM2	ENST00000400546.1	neural cell adhesion molecule 2	64
Details	519	98	hsa-miR-190a-3p	ATL2	atlastin GTPase 2			MIRT552372	hsa	hsa	hsa-miR-190a-3p	ZNF562		C10orf67	ENST00000323327.4	chromosome 10 open reading frame 67	5
Details	520	98	hsa-miR-190a-3p	DLG2	discs large MAGUK scaffold protein 2			MIRT552540	hsa	hsa	hsa-miR-190a-3p	ZHX3		SCPEP1	ENST00000262288.3	serine carboxypeptidase 1	276
Details	521	98	hsa-miR-190a-3p	TBC1D4	TBC1 domain family member 4			MIRT552601	hsa	hsa	hsa-miR-190a-3p	ZC3H12C		CEBPB	ENST00000303004.3	CCAAT/enhancer binding protein (C/EBP), beta	3178
Details	522	98	hsa-miR-190a-3p	SCN8A	sodium voltage-gated channel alpha subunit 8			MIRT552945	hsa	hsa	hsa-miR-190a-3p	VGLL2		SPATA31A6	ENST00000332857.6	SPATA31 subfamily A, member 6	5
Details	523	98	hsa-miR-190a-3p	APLP2	amyloid beta precursor like protein 2			MIRT553321	hsa	hsa	hsa-miR-190a-3p	TSPAN14		EIF3E	ENST00000220849.5	eukaryotic translation initiation factor 3, subunit E	906
Details	524	98	hsa-miR-190a-3p	NEDD4	neural precursor cell expressed, developmentally down-regulated 4, E3 ubiquitin protein ligase			MIRT553553	hsa	hsa	hsa-miR-190a-3p	TMEM161B		PHACTR2	ENST00000427704.2	phosphatase and actin regulator 2	274
Details	525	98	hsa-miR-190a-3p	ARHGAP29	Rho GTPase activating protein 29			MIRT553648	hsa	hsa	hsa-miR-190a-3p	TIMM10		CELA2B	ENST00000375910.3	chymotrypsin-like elastase family, member 2B	5
Details	526	98	hsa-miR-190a-3p	THAP1	THAP domain containing 1			MIRT554584	hsa	hsa	hsa-miR-190a-3p	RRAGC		DNAH12	ENST00000351747.2	dynein, axonemal, heavy chain 12	5
Details	527	98	hsa-miR-190a-3p	UBALD2	UBA like domain containing 2			MIRT554633	hsa	hsa	hsa-miR-190a-3p	RPL37		CLDN11	ENST00000064724.3	claudin 11	1116
Details	528	98	hsa-miR-190a-3p	PPP3CC	protein phosphatase 3 catalytic subunit gamma			MIRT554828	hsa	hsa	hsa-miR-190a-3p	RECK		SFR1	ENST00000369729.3	SWI5-dependent recombination repair 1	56
Details	529	98	hsa-miR-190a-3p	CPEB4	cytoplasmic polyadenylation element binding protein 4			MIRT555051	hsa	hsa	hsa-miR-190a-3p	QKI		SMAD7	ENST00000262158.2	SMAD family member 7	142
Details	530	98	hsa-miR-190a-3p	APBA1	amyloid beta precursor protein binding family A member 1			MIRT555122	hsa	hsa	hsa-miR-190a-3p	PTPRJ		HTR1F	ENST00000319595.4	5-hydroxytryptamine (serotonin) receptor 1F, G protein-coupled	5
Details	531	98	hsa-miR-190a-3p	NLGN4X	neuroligin 4 X-linked			MIRT556203	hsa	hsa	hsa-miR-190a-3p	MBNL2		CYLC2	ENST00000374798.3	cylicin, basic protein of sperm head cytoskeleton 2	5
Details	532	98	hsa-miR-190a-3p	KCNH5	potassium voltage-gated channel subfamily H member 5			MIRT556247	hsa	hsa	hsa-miR-190a-3p	45719		MPP6	ENST00000222644.5	membrane protein, palmitoylated 6 (MAGUK p55 subfamily member 6)	389
Details	533	98	hsa-miR-190a-3p	IRS2	insulin receptor substrate 2			MIRT556773	hsa	hsa	hsa-miR-190a-3p	KLF6		TCF4	ENST00000354452.3	transcription factor 4	394
Details	534	98	hsa-miR-190a-3p	RNF32	ring finger protein 32			MIRT557262	hsa	hsa	hsa-miR-190a-3p	HMGN3		ELMOD2	ENST00000323570.3	ELMO/CED-12 domain containing 2	32
Details	535	98	hsa-miR-190a-3p	ZFAND5	zinc finger AN1-type containing 5			MIRT557745	hsa	hsa	hsa-miR-190a-3p	FUBP1		CBX8	ENST00000269385.4	chromobox homolog 8	474
Details	536	98	hsa-miR-190a-3p	EPOR	erythropoietin receptor			MIRT557794	hsa	hsa	hsa-miR-190a-3p	FREM2		TIGD7	ENST00000396862.1	tigger transposable element derived 7	22
Details	537	98	hsa-miR-190a-3p	PDE3A	phosphodiesterase 3A			MIRT557803	hsa	hsa	hsa-miR-190a-3p	FOXP1		AHR	ENST00000242057.4	aryl hydrocarbon receptor	25
Details	538	98	hsa-miR-190a-3p	CEBPB	CCAAT enhancer binding protein beta			MIRT557922	hsa	hsa	hsa-miR-190a-3p	FBXL18		RC3H1	ENST00000367696.2	ring finger and CCCH-type domains 1	165
Details	539	98	hsa-miR-190a-3p	UNG	uracil DNA glycosylase			MIRT557985	hsa	hsa	hsa-miR-190a-3p	FAM177A1		PAPL	ENST00000331256.5	Iron/zinc purple acid phosphatase-like protein	5
Details	540	98	hsa-miR-190a-3p	FBXO47	F-box protein 47			MIRT558079	hsa	hsa	hsa-miR-190a-3p	ERC1		UBE2H	ENST00000355621.3	ubiquitin-conjugating enzyme E2H	855
Details	541	98	hsa-miR-190a-3p	GDF10	growth differentiation factor 10			MIRT558286	hsa	hsa	hsa-miR-190a-3p	DUSP8		NUFIP2	ENST00000225388.4	nuclear fragile X mental retardation protein interacting protein 2	440
Details	542	98	hsa-miR-190a-3p	CBX6	chromobox 6			MIRT558396	hsa	hsa	hsa-miR-190a-3p	DGKH		ATP10A	ENST00000356865.6	ATPase, class V, type 10A	16
Details	543	98	hsa-miR-190a-3p	HDAC4	histone deacetylase 4			MIRT558429	hsa	hsa	hsa-miR-190a-3p	DDX3X		FGFR2	ENST00000369061.4	fibroblast growth factor receptor 2	75
Details	544	98	hsa-miR-190a-3p	SLC30A4	solute carrier family 30 member 4			MIRT558435	hsa	hsa	hsa-miR-190a-3p	DDX17		CCDC89	ENST00000316398.3	coiled-coil domain containing 89	11
Details	545	98	hsa-miR-190a-3p	RPS6KA6	ribosomal protein S6 kinase A6			MIRT559195	hsa	hsa	hsa-miR-190a-3p	BMP2		KLF7	ENST00000423015.1	Kruppel-like factor 7 (ubiquitous)	737
Details	546	98	hsa-miR-190a-3p	CADM1	cell adhesion molecule 1			MIRT559210	hsa	hsa	hsa-miR-190a-3p	BLOC1S4		RDH14	ENST00000381249.3	retinol dehydrogenase 14 (all-trans/9-cis/11-cis)	535
Details	547	98	hsa-miR-190a-3p	TCF21	transcription factor 21			MIRT559487	hsa	hsa	hsa-miR-190a-3p	ARL5B		HPS5	ENST00000537258.1	Hermansky-Pudlak syndrome 5	281
Details	548	98	hsa-miR-190a-3p	ABCA5	ATP binding cassette subfamily A member 5			MIRT559572	hsa	hsa	hsa-miR-190a-3p	APP		RAB30	ENST00000533486.1	RAB30, member RAS oncogene family	274
Details	549	98	hsa-miR-190a-3p	MAGEE2	MAGE family member E2			MIRT559577	hsa	hsa	hsa-miR-190a-3p	AP1AR		RGL1	ENST00000304685.4	ral guanine nucleotide dissociation stimulator-like 1	188
Details	550	98	hsa-miR-190a-3p	FAM131B	family with sequence similarity 131 member B			MIRT561174	hsa	hsa	hsa-miR-190a-3p	TMEM30A		C1QC	ENST00000374640.4	complement component 1, q subcomponent, C chain	5
Details	551	98	hsa-miR-190a-3p	ZFP36	ZFP36 ring finger protein			MIRT562571	hsa	hsa	hsa-miR-190a-3p	CBX6		PPAP2B	ENST00000371250.3	phosphatidic acid phosphatase type 2B	81
Details	552	98	hsa-miR-190a-3p	SPATS2L	spermatogenesis associated serine rich 2 like			MIRT563637	hsa	hsa	hsa-miR-190a-3p	ETS2		ATN1	ENST00000356654.4	atrophin 1	187
Details	553	98	hsa-miR-190a-3p	LMTK2	lemur tyrosine kinase 2			MIRT563710	hsa	hsa	hsa-miR-190a-3p	SVIP		TECRL	ENST00000381210.3	trans-2,3-enoyl-CoA reductase-like	5
Details	554	98	hsa-miR-190a-3p	PALM2-AKAP2	PALM2-AKAP2 readthrough			MIRT563780	hsa	hsa	hsa-miR-190a-3p	HUWE1		UBE2V1	ENST00000371657.5	ubiquitin-conjugating enzyme E2 variant 1	1621
Details	555	98	hsa-miR-190a-3p	SSTR1	somatostatin receptor 1			MIRT564001	hsa	hsa	hsa-miR-190a-3p	CCL11		ENPP3	ENST00000358229.5	ectonucleotide pyrophosphatase/phosphodiesterase 3	37
Details	556	98	hsa-miR-190a-3p	ZBTB43	zinc finger and BTB domain containing 43			MIRT564559	hsa	hsa	hsa-miR-190a-3p	CCDC80		ZFAND5	ENST00000237937.3	zinc finger, AN1-type domain 5	2522
Details	557	98	hsa-miR-190a-3p	CELF5	CUGBP Elav-like family member 5			MIRT564584	hsa	hsa	hsa-miR-190a-3p	ZRANB1		DLEU7	ENST00000504404.1	deleted in lymphocytic leukemia, 7	5
Details	558	98	hsa-miR-190a-3p	TPM1	tropomyosin 1			MIRT566607	hsa	hsa	hsa-miR-190a-3p	NR3C1		C10orf131	ENST00000423344.2	chromosome 10 open reading frame 131	5
Details	559	98	hsa-miR-190a-3p	STAM2	signal transducing adaptor molecule 2			MIRT566813	hsa	hsa	hsa-miR-190a-3p	MASTL		SAMD13	ENST00000370667.3	sterile alpha motif domain containing 13	253
Details	560	98	hsa-miR-190a-3p	GNRHR	gonadotropin releasing hormone receptor			MIRT567647	hsa	hsa	hsa-miR-190a-3p	EXOC8		EIF1AX	ENST00000379607.5	eukaryotic translation initiation factor 1A, X-linked	277
Details	561	98	hsa-miR-190a-3p	POT1	protection of telomeres 1			MIRT568283	hsa	hsa	hsa-miR-190a-3p	BCOR		ZNF610	ENST00000601151.1	zinc finger protein 610	13
Details	562	98	hsa-miR-190a-3p	FBXL18	F-box and leucine rich repeat protein 18			MIRT573563	hsa	hsa	hsa-miR-190a-3p	RANBP1		C1orf101	ENST00000366533.4	chromosome 1 open reading frame 101	5
Details	563	98	hsa-miR-190a-3p	PKN2	protein kinase N2			MIRT576691	mmu	mmu	hsa-miR-190a-3p	Pck1		GABRA4	ENST00000264318.3	gamma-aminobutyric acid (GABA) A receptor, alpha 4	5
Details	564	98	hsa-miR-190a-3p	DISC1	DISC1 scaffold protein			MIRT607461	hsa	hsa	hsa-miR-190a-3p	PCK1		POTEM	ENST00000551509.1	POTE ankyrin domain family, member M	5
Details	565	98	hsa-miR-190a-3p	ACER3	alkaline ceramidase 3			MIRT609329	hsa	hsa	hsa-miR-190a-3p	TAS2R30		STARD4	ENST00000512160.1	StAR-related lipid transfer (START) domain containing 4	767
Details	566	98	hsa-miR-190a-3p	YAP1	Yes associated protein 1			MIRT609399	hsa	hsa	hsa-miR-190a-3p	CHEK1		C16orf87	ENST00000394806.2	chromosome 16 open reading frame 87	95
Details	567	98	hsa-miR-190a-3p	NETO1	neuropilin and tolloid like 1			MIRT609460	hsa	hsa	hsa-miR-190a-3p	DHX36		C1GALT1	ENST00000223122.3	core 1 synthase, glycoprotein-N-acetylgalactosamine 3-beta-galactosyltransferase, 1	44
Details	568	98	hsa-miR-190a-3p	PPP1R9B	protein phosphatase 1 regulatory subunit 9B			MIRT609963	hsa	hsa	hsa-miR-190a-3p	LILRB1		CAPS2	ENST00000409799.1	calcyphosine 2	8
Details	569	98	hsa-miR-190a-3p	GAB1	GRB2 associated binding protein 1			MIRT611914	hsa	hsa	hsa-miR-190a-3p	RAB3GAP1		MTRNR2L10	ENST00000545075.1	MT-RNR2-like 10	7
Details	570	98	hsa-miR-190a-3p	E2F8	E2F transcription factor 8			MIRT612176	hsa	hsa	hsa-miR-190a-3p	EMC3		IFNE	ENST00000448696.3	interferon, epsilon	65
Details	571	98	hsa-miR-190a-3p	ZNF512B	zinc finger protein 512B			MIRT612472	hsa	hsa	hsa-miR-190a-3p	SLITRK4		PPP1R2	ENST00000328432.3	protein phosphatase 1, regulatory (inhibitor) subunit 2	8
Details	572	98	hsa-miR-190a-3p	ZNF124	zinc finger protein 124			MIRT612874	hsa	hsa	hsa-miR-190a-3p	IGF2BP1		TPR	ENST00000367478.4	translocated promoter region, nuclear basket protein	529
Details	573	98	hsa-miR-190a-3p	BMPER	BMP binding endothelial regulator			MIRT612955	hsa	hsa	hsa-miR-190a-3p	GCK		C9orf85	ENST00000486911.2	chromosome 9 open reading frame 85	57
Details	574	98	hsa-miR-190a-3p	FBXL2	F-box and leucine rich repeat protein 2			MIRT614117	hsa	hsa	hsa-miR-190a-3p	TUBD1		PPP1R1A	ENST00000257905.8	protein phosphatase 1, regulatory (inhibitor) subunit 1A	17
Details	575	98	hsa-miR-190a-3p	PCSK2	proprotein convertase subtilisin/kexin type 2			MIRT614153	hsa	hsa	hsa-miR-190a-3p	CEP97		JUN	ENST00000371222.2	jun proto-oncogene	7432
Details	576	98	hsa-miR-190a-3p	MKLN1	muskelin 1			MIRT614382	hsa	hsa	hsa-miR-190a-3p	FGFBP3		BTG2	ENST00000290551.4	BTG family, member 2	758
Details	577	98	hsa-miR-190a-3p	EXOC4	exocyst complex component 4			MIRT615017	hsa	hsa	hsa-miR-190a-3p	ELK4		GULP1	ENST00000409843.1	GULP, engulfment adaptor PTB domain containing 1	196
Details	578	98	hsa-miR-190a-3p	PTF1A	pancreas associated transcription factor 1a			MIRT615700	hsa	hsa	hsa-miR-190a-3p	NEGR1		SBDS	ENST00000246868.2	Shwachman-Bodian-Diamond syndrome	5
Details	579	97	hsa-miR-190a-3p	DNAJB14	DnaJ heat shock protein family (Hsp40) member B14			MIRT616825	hsa	hsa	hsa-miR-190a-3p	KYNU		GP9	ENST00000307395.4	glycoprotein IX (platelet)	5
Details	580	97	hsa-miR-190a-3p	RNF217	ring finger protein 217			MIRT620335	hsa	hsa	hsa-miR-190a-3p	SPAST		PLEKHF2	ENST00000315367.3	pleckstrin homology domain containing, family F (with FYVE domain) member 2	286
Details	581	97	hsa-miR-190a-3p	SMARCAD1	SWI/SNF-related, matrix-associated actin-dependent regulator of chromatin, subfamily a, containing DEAD/H box 1			MIRT624747	hsa	hsa	hsa-miR-190a-3p	ANGPTL2		CHSY3	ENST00000305031.4	chondroitin sulfate synthase 3	221
Details	582	97	hsa-miR-190a-3p	PJA2	praja ring finger ubiquitin ligase 2			MIRT625217	hsa	hsa	hsa-miR-190a-3p	SH3TC2		GPATCH11	ENST00000409774.1	G patch domain containing 11	113
Details	583	97	hsa-miR-190a-3p	USF3	upstream transcription factor family member 3			MIRT628489	hsa	hsa	hsa-miR-190a-3p	ACVR2B		CAPZA2	ENST00000361183.3	capping protein (actin filament) muscle Z-line, alpha 2	2065
Details	584	97	hsa-miR-190a-3p	SLC4A7	solute carrier family 4 member 7			MIRT630705	hsa	hsa	hsa-miR-190a-3p	GDNF		AHSA2	ENST00000394457.3	AHA1, activator of heat shock 90kDa protein ATPase homolog 2 (yeast)	820
Details	585	97	hsa-miR-190a-3p	CCDC82	coiled-coil domain containing 82			MIRT636378	hsa	hsa	hsa-miR-190a-3p	NSUN3		ABCC9	ENST00000261200.4	ATP-binding cassette, sub-family C (CFTR/MRP), member 9	5
Details	586	97	hsa-miR-190a-3p	KSR2	kinase suppressor of ras 2			MIRT640072	hsa	hsa	hsa-miR-190a-3p	KCNMB4		XPOT	ENST00000332707.5	exportin, tRNA	887
Details	587	97	hsa-miR-190a-3p	CXCL5	C-X-C motif chemokine ligand 5			MIRT641185	hsa	hsa	hsa-miR-190a-3p	TRIP10		RIPPLY2	ENST00000369689.1	ripply transcriptional repressor 2	14
Details	588	97	hsa-miR-190a-3p	NAMPT	nicotinamide phosphoribosyltransferase			MIRT651172	hsa	hsa	hsa-miR-190a-3p	ZNF319		STARD8	ENST00000252336.6	StAR-related lipid transfer (START) domain containing 8	29
Details	589	97	hsa-miR-190a-3p	RAB38	RAB38, member RAS oncogene family			MIRT662384	hsa	hsa	hsa-miR-190a-3p	ICA1L		MAPK3	ENST00000403394.1	mitogen-activated protein kinase 3	271
Details	590	97	hsa-miR-190a-3p	RNF6	ring finger protein 6			MIRT666355	hsa	hsa	hsa-miR-190a-3p	SIKE1		TBX20	ENST00000408931.3	T-box 20	0
Details	591	97	hsa-miR-190a-3p	WDR76	WD repeat domain 76			MIRT675943	hsa	hsa	hsa-miR-190a-3p	TSPAN1		CHP2	ENST00000300113.2	calcineurin-like EF-hand protein 2	5
Details	592	97	hsa-miR-190a-3p	MAP2	microtubule associated protein 2			MIRT686850	hsa	hsa	hsa-miR-190a-3p	SLC6A5		MYBL1	ENST00000522677.3	v-myb avian myeloblastosis viral oncogene homolog-like 1	53
Details	593	97	hsa-miR-190a-3p	DNA2	DNA replication helicase/nuclease 2			MIRT687622	hsa	hsa	hsa-miR-190a-3p	LRRC40		GABRB3	ENST00000311550.5	gamma-aminobutyric acid (GABA) A receptor, beta 3	267
Details	594	97	hsa-miR-190a-3p	PIK3C2A	phosphatidylinositol-4-phosphate 3-kinase catalytic subunit type 2 alpha			MIRT687822	hsa	hsa	hsa-miR-190a-3p	ITPRIP		ZNF626	ENST00000291750.6	zinc finger protein 626	24
Details	595	97	hsa-miR-190a-3p	KCNK2	potassium two pore domain channel subfamily K member 2			MIRT699247	hsa	hsa	hsa-miR-190a-3p	SLC6A8		EPHA1	ENST00000275815.3	EPH receptor A1	13
Details	596	97	hsa-miR-190a-3p	TULP3	tubby like protein 3			MIRT700647	hsa	hsa	hsa-miR-190a-3p	PPP1R2		ZNF804A	ENST00000302277.6	zinc finger protein 804A	5
Details	597	97	hsa-miR-190a-3p	FRMD6	FERM domain containing 6			MIRT701870	hsa	hsa	hsa-miR-190a-3p	MPP6		SMPDL3A	ENST00000368440.4	sphingomyelin phosphodiesterase, acid-like 3A	103
Details	598	97	hsa-miR-190a-3p	RUNX1	runt related transcription factor 1			MIRT702311	hsa	hsa	hsa-miR-190a-3p	L1CAM		C6orf10	ENST00000447241.2	chromosome 6 open reading frame 10	5
Details	599	97	hsa-miR-190a-3p	SMIM10L1	small integral membrane protein 10 like 1			MIRT702997	hsa	hsa	hsa-miR-190a-3p	HERPUD2		CDKL1	ENST00000395834.1	cyclin-dependent kinase-like 1 (CDC2-related kinase)	90
Details	600	97	hsa-miR-190a-3p	HNRNPK	heterogeneous nuclear ribonucleoprotein K			MIRT704681	hsa	hsa	hsa-miR-190a-3p	CHST2		MSMO1	ENST00000261507.6	methylsterol monooxygenase 1	1413
Details	601	97	hsa-miR-190a-3p	FGFBP3	fibroblast growth factor binding protein 3			MIRT706766	hsa	hsa	hsa-miR-190a-3p	PRRC2C		SKA2	ENST00000580541.1	spindle and kinetochore associated complex subunit 2	414
Details	602	97	hsa-miR-190a-3p	PITPNB	phosphatidylinositol transfer protein beta			MIRT706884	hsa	hsa	hsa-miR-190a-3p	AHCYL2		CHRNA9	ENST00000310169.2	cholinergic receptor, nicotinic, alpha 9 (neuronal)	20
Details	603	97	hsa-miR-190a-3p	SOWAHC	sosondowah ankyrin repeat domain family member C			MIRT706950	hsa	hsa	hsa-miR-190a-3p	SPRED1		SPATA31A3	ENST00000356699.5	SPATA31 subfamily A, member 3	5
Details	604	97	hsa-miR-190a-3p	45354	membrane associated ring-CH-type finger 3			MIRT707082	hsa	hsa	hsa-miR-190a-3p	LONRF3		SREK1IP1	ENST00000513458.4	SREK1-interacting protein 1	145
Details	605	97	hsa-miR-190a-3p	CHIC1	cysteine rich hydrophobic domain 1			MIRT707128	hsa	hsa	hsa-miR-190a-3p	TANK		AL133373.1	ENST00000596306.1	Uncharacterized protein	5
Details	606	97	hsa-miR-190a-3p	ZNF264	zinc finger protein 264			MIRT707130	hsa	hsa	hsa-miR-190a-3p	IKZF2		ZNF667	ENST00000591790.1	zinc finger protein 667	24
Details	607	97	hsa-miR-190a-3p	XRN1	5'-3' exoribonuclease 1			MIRT707219	hsa	hsa	hsa-miR-190a-3p	STAM		RABL3	ENST00000273375.3	RAB, member of RAS oncogene family-like 3	165
Details	608	97	hsa-miR-190a-3p	ABCC9	ATP binding cassette subfamily C member 9			MIRT707246	hsa	hsa	hsa-miR-190a-3p	SIK3		NR4A3	ENST00000330847.1	nuclear receptor subfamily 4, group A, member 3	244
Details	609	97	hsa-miR-190a-3p	THSD7A	thrombospondin type 1 domain containing 7A			MIRT707268	hsa	hsa	hsa-miR-190a-3p	KCNB1		COMMD8	ENST00000381571.4	COMM domain containing 8	1146
Details	610	97	hsa-miR-190a-3p	PTEN	phosphatase and tensin homolog			MIRT707282	hsa	hsa	hsa-miR-190a-3p	NBPF10		ARL8A	ENST00000272217.2	ADP-ribosylation factor-like 8A	272
Details	611	97	hsa-miR-190a-3p	AMMECR1	Alport syndrome, mental retardation, midface hypoplasia and elliptocytosis chromosomal region gene 1			MIRT707301	hsa	hsa	hsa-miR-190a-3p	ARHGEF11		TMEM108	ENST00000321871.6	transmembrane protein 108	31
Details	612	97	hsa-miR-190a-3p	TSEN34	tRNA splicing endonuclease subunit 34			MIRT707331	hsa	hsa	hsa-miR-190a-3p	PCDH7		MOB4	ENST00000233892.4	MOB family member 4, phocein	123
Details	613	97	hsa-miR-190a-3p	RELCH	RAB11 binding and LisH domain, coiled-coil and HEAT repeat containing			MIRT707336	hsa	hsa	hsa-miR-190a-3p	MFAP5		RSRC2	ENST00000331738.7	arginine/serine-rich coiled-coil 2	320
Details	614	97	hsa-miR-190a-3p	ZBTB10	zinc finger and BTB domain containing 10			MIRT707394	hsa	hsa	hsa-miR-190a-3p	DCAF4L1		ARHGEF1	ENST00000347545.4	Rho guanine nucleotide exchange factor (GEF) 1	392
Details	615	97	hsa-miR-190a-3p	FBXL14	F-box and leucine rich repeat protein 14			MIRT707429	hsa	hsa	hsa-miR-190a-3p	WNT11		SNX14	ENST00000346348.3	sorting nexin 14	1132
Details	616	97	hsa-miR-190a-3p	RBM23	RNA binding motif protein 23			MIRT707436	hsa	hsa	hsa-miR-190a-3p	WDTC1		KIAA2022	ENST00000055682.6	KIAA2022	5
Details	617	97	hsa-miR-190a-3p	ZNF365	zinc finger protein 365			MIRT707526	hsa	hsa	hsa-miR-190a-3p	CXCL5		ANGPT1	ENST00000520734.1	angiopoietin 1	21
Details	618	97	hsa-miR-190a-3p	BTBD7	BTB domain containing 7			MIRT707538	hsa	hsa	hsa-miR-190a-3p	ADAMTS9		DNAJC21	ENST00000382021.2	DnaJ (Hsp40) homolog, subfamily C, member 21	528
Details	619	97	hsa-miR-190a-3p	TENM1	teneurin transmembrane protein 1			MIRT707554	hsa	hsa	hsa-miR-190a-3p	IGFBP1		TBCA	ENST00000306388.6	tubulin folding cofactor A	3605
Details	620	97	hsa-miR-190a-3p	TBX18	T-box 18			MIRT707564	hsa	hsa	hsa-miR-190a-3p	SLCO1B3		C5orf49	ENST00000399810.2	chromosome 5 open reading frame 49	7
Details	621	97	hsa-miR-190a-3p	CRIM1	cysteine rich transmembrane BMP regulator 1			MIRT707615	hsa	hsa	hsa-miR-190a-3p	WISP1		GINM1	ENST00000367419.5	glycoprotein integral membrane 1	428
Details	622	97	hsa-miR-190a-3p	TRIM2	tripartite motif containing 2			MIRT707657	hsa	hsa	hsa-miR-190a-3p	FAM47E-STBD1		MYOT	ENST00000239926.4	myotilin	5
Details	623	97	hsa-miR-190a-3p	ZC3H4	zinc finger CCCH-type containing 4			MIRT707754	hsa	hsa	hsa-miR-190a-3p	ZMAT3		ERCC6L2	ENST00000407474.3	excision repair cross-complementing rodent repair deficiency, complementation group 6-like 2	118
Details	624	97	hsa-miR-190a-3p	QKI	QKI, KH domain containing RNA binding			MIRT707781	hsa	hsa	hsa-miR-190a-3p	WDR12		INTU	ENST00000335251.6	inturned planar cell polarity protein	105
Details	625	97	hsa-miR-190a-3p	DNAJB4	DnaJ heat shock protein family (Hsp40) member B4			MIRT707784	hsa	hsa	hsa-miR-190a-3p	UNK		NEGR1	ENST00000357731.5	neuronal growth regulator 1	28
Details	626	97	hsa-miR-190a-3p	FRMPD4	FERM and PDZ domain containing 4			MIRT707792	hsa	hsa	hsa-miR-190a-3p	TTYH3		SVIL	ENST00000375400.3	supervillin	62
Details	627	97	hsa-miR-190a-3p	TNPO1	transportin 1			MIRT707814	hsa	hsa	hsa-miR-190a-3p	TMEM178B		APIP	ENST00000395787.3	APAF1 interacting protein	185
Details	628	97	hsa-miR-190a-3p	KHSRP	KH-type splicing regulatory protein			MIRT707845	hsa	hsa	hsa-miR-190a-3p	TIGD5		TGFBR3	ENST00000212355.4	transforming growth factor, beta receptor III	245
Details	629	97	hsa-miR-190a-3p	CACNB4	calcium voltage-gated channel auxiliary subunit beta 4			MIRT707852	hsa	hsa	hsa-miR-190a-3p	STYX		NCK2	ENST00000451463.2	NCK adaptor protein 2	178
Details	630	97	hsa-miR-190a-3p	KCNJ3	potassium voltage-gated channel subfamily J member 3			MIRT707861	hsa	hsa	hsa-miR-190a-3p	SRGAP2		MARCH6	ENST00000274140.5	membrane-associated ring finger (C3HC4) 6, E3 ubiquitin protein ligase	14086
Details	631	97	hsa-miR-190a-3p	METTL21A	methyltransferase like 21A			MIRT707872	hsa	hsa	hsa-miR-190a-3p	SNRK		PURG	ENST00000475541.1	purine-rich element binding protein G	29
Details	632	97	hsa-miR-190a-3p	TAS2R20	taste 2 receptor member 20			MIRT707881	hsa	hsa	hsa-miR-190a-3p	SLC45A4		SPATA31A5	ENST00000377621.1	SPATA31 subfamily A, member 5	5
Details	633	97	hsa-miR-190a-3p	PLPPR4	phospholipid phosphatase related 4			MIRT707894	hsa	hsa	hsa-miR-190a-3p	SLC25A12		SPATA31A7	ENST00000355045.2	SPATA31 subfamily A, member 7	5
Details	634	97	hsa-miR-190a-3p	VSTM2A	V-set and transmembrane domain containing 2A			MIRT707918	hsa	hsa	hsa-miR-190a-3p	PRIMA1		SPATA31A4	ENST00000429767.1	SPATA31 subfamily A, member 4	5
Details	635	97	hsa-miR-190a-3p	TRIM61	tripartite motif containing 61			MIRT707980	hsa	hsa	hsa-miR-190a-3p	PAPPA		DDX59	ENST00000331314.6	DEAD (Asp-Glu-Ala-Asp) box polypeptide 59	141
Details	636	97	hsa-miR-190a-3p	FZD5	frizzled class receptor 5			MIRT708009	hsa	hsa	hsa-miR-190a-3p	NR2C2		SLC11A2	ENST00000262051.7	solute carrier family 11 (proton-coupled divalent metal ion transporter), member 2	526
Details	637	97	hsa-miR-190a-3p	GDAP2	ganglioside induced differentiation associated protein 2			MIRT708045	hsa	hsa	hsa-miR-190a-3p	MCAM		ST20-MTHFS	ENST00000479961.1	ST20-MTHFS readthrough	1604
Details	638	97	hsa-miR-190a-3p	CSPP1	centrosome and spindle pole associated protein 1			MIRT708090	hsa	hsa	hsa-miR-190a-3p	KIAA1671		SLC25A24	ENST00000565488.1	solute carrier family 25 (mitochondrial carrier; phosphate carrier), member 24	1688
Details	639	97	hsa-miR-190a-3p	VAMP2	vesicle associated membrane protein 2			MIRT708115	hsa	hsa	hsa-miR-190a-3p	GREB1L		ONECUT2	ENST00000491143.2	one cut homeobox 2	847
Details	640	97	hsa-miR-190a-3p	TPTE2	transmembrane phosphoinositide 3-phosphatase and tensin homolog 2			MIRT708156	hsa	hsa	hsa-miR-190a-3p	CADM1		DCTN6	ENST00000221114.3	dynactin 6	745
Details	641	97	hsa-miR-190a-3p	KANSL1L	KAT8 regulatory NSL complex subunit 1 like			MIRT708159	hsa	hsa	hsa-miR-190a-3p	C18orf32		TBX18	ENST00000369663.5	T-box 18	54
Details	642	96	hsa-miR-190a-3p	C10orf67	chromosome 10 open reading frame 67			MIRT708213	hsa	hsa	hsa-miR-190a-3p	ADD2		APOOL	ENST00000373173.2	apolipoprotein O-like	109
Details	643	96	hsa-miR-190a-3p	ZDHHC21	zinc finger DHHC-type containing 21			MIRT725029	hsa	hsa	hsa-miR-190a-3p	NDUFAF7		SPATA31A1	ENST00000377647.3	SPATA31 subfamily A, member 1	5
Details	644	96	hsa-miR-190a-3p	SSPN	sarcospan			MIRT733455	hsa	hsa	hsa-miR-190a-3p	PTEN		GNG2	ENST00000556752.1	guanine nucleotide binding protein (G protein), gamma 2	199
Details	645	96	hsa-miR-190a-3p	CADM2	cell adhesion molecule 2			MIRT734477	mmu	mmu	mmu-miR-190a-3p	TIAM1		AMER1	ENST00000330258.3	APC membrane recruitment protein 1	11
Details	646	96	hsa-miR-190a-3p	ODF2L	outer dense fiber of sperm tails 2 like			MIRT734478	mmu	mmu	mmu-miR-190a-3p	NTRK3		AP1AR	ENST00000274000.5	adaptor-related protein complex 1 associated regulatory protein	89
Details	647	96	hsa-miR-190a-3p	HINT3	histidine triad nucleotide binding protein 3			MIRT740664	hsa	hsa	hsa-miR-190a-3p	CCDC186		ERICH1	ENST00000262109.7	glutamate-rich 1	335
Details	648	96	hsa-miR-190a-3p	SLK	STE20 like kinase			MIRT740669	hsa	hsa	hsa-miR-190a-3p	ADGRL2		KLF6	ENST00000542957.1	Kruppel-like factor 6	4644
Details	649	96	hsa-miR-190a-3p	RASSF6	Ras association domain family member 6			MIRT742425	hsa	hsa	hsa-miR-190a-3p	CCAR2		KIAA1456	ENST00000524591.2	KIAA1456	24
Details	650	96	hsa-miR-190a-3p	SNIP1	Smad nuclear interacting protein 1			MIRT754281	hsa	hsa	hsa-miR-190a-3p	LINC01553		SERPINB2	ENST00000299502.4	serpin peptidase inhibitor, clade B (ovalbumin), member 2	41
Details	651	96	hsa-miR-190a-3p	SPAG9	sperm associated antigen 9			MIRT754651	hsa	hsa	hsa-miR-190a-3p	C11orf98		SNAP23	ENST00000249647.3	synaptosomal-associated protein, 23kDa	99
Details	652	96	hsa-miR-190a-3p	BPTF	bromodomain PHD finger transcription factor			MIRT755300	hsa	hsa	hsa-miR-190a-3p	TMEM263		MARCH3	ENST00000308660.5	membrane-associated ring finger (C3HC4) 3, E3 ubiquitin protein ligase	77
Details	653	96	hsa-miR-190a-3p	EPB41L1	erythrocyte membrane protein band 4.1 like 1									FUT9	ENST00000302103.5	fucosyltransferase 9 (alpha (1,3) fucosyltransferase)	5
Details	654	96	hsa-miR-190a-3p	ITSN1	intersectin 1									SPRED1	ENST00000299084.4	sprouty-related, EVH1 domain containing 1	547
Details	655	96	hsa-miR-190a-3p	RNFT1	ring finger protein, transmembrane 1									SPSB1	ENST00000328089.6	splA/ryanodine receptor domain and SOCS box containing 1	572
Details	656	96	hsa-miR-190a-3p	DAPK1	death associated protein kinase 1									MTHFS	ENST00000258874.3	5,10-methenyltetrahydrofolate synthetase (5-formyltetrahydrofolate cyclo-ligase)	1604
Details	657	96	hsa-miR-190a-3p	ADGRB2	adhesion G protein-coupled receptor B2									UNG	ENST00000242576.2	uracil-DNA glycosylase	2812
Details	658	96	hsa-miR-190a-3p	COPS2	COP9 signalosome subunit 2									RANBP10	ENST00000317506.3	RAN binding protein 10	140
Details	659	96	hsa-miR-190a-3p	EFCAB2	EF-hand calcium binding domain 2									NRXN3	ENST00000281127.7	neurexin 3	14
Details	660	96	hsa-miR-190a-3p	NRXN3	neurexin 3									P2RY12	ENST00000302632.3	purinergic receptor P2Y, G-protein coupled, 12	5
Details	661	96	hsa-miR-190a-3p	FNIP1	folliculin interacting protein 1									SETD3	ENST00000331768.5	SET domain containing 3	58
Details	662	96	hsa-miR-190a-3p	FCHO2	FCH domain only 2									SPATA31A2	ENST00000456183.2	SPATA31 subfamily A, member 2	5
Details	663	96	hsa-miR-190a-3p	FAM120C	family with sequence similarity 120C									ELF2	ENST00000394235.2	E74-like factor 2 (ets domain transcription factor)	26
Details	664	96	hsa-miR-190a-3p	ZNF391	zinc finger protein 391									CEP192	ENST00000325971.8	centrosomal protein 192kDa	2588
Details	665	96	hsa-miR-190a-3p	USP45	ubiquitin specific peptidase 45									TRMT13	ENST00000370141.2	tRNA methyltransferase 13 homolog (S. cerevisiae)	45
Details	666	96	hsa-miR-190a-3p	USP15	ubiquitin specific peptidase 15									FAM46A	ENST00000369754.3	family with sequence similarity 46, member A	899
Details	667	96	hsa-miR-190a-3p	CISD3	CDGSH iron sulfur domain 3									ITSN1	ENST00000379960.5	intersectin 1 (SH3 domain protein)	194
Details	668	96	hsa-miR-190a-3p	TMX4	thioredoxin related transmembrane protein 4									CRISP3	ENST00000263045.4	cysteine-rich secretory protein 3	5
Details	669	96	hsa-miR-190a-3p	ZBTB4	zinc finger and BTB domain containing 4									ELAVL4	ENST00000371824.1	ELAV like neuron-specific RNA binding protein 4	5
Details	670	96	hsa-miR-190a-3p	ZNF175	zinc finger protein 175									GOLIM4	ENST00000470487.1	golgi integral membrane protein 4	48
Details	671	96	hsa-miR-190a-3p	CENPL	centromere protein L									GSR	ENST00000221130.5	glutathione reductase	858
Details	672	96	hsa-miR-190a-3p	PPP1R2	protein phosphatase 1 regulatory inhibitor subunit 2									RAD54B	ENST00000297592.5	RAD54 homolog B (S. cerevisiae)	36
Details	673	96	hsa-miR-190a-3p	WNT5B	Wnt family member 5B									MOSPD1	ENST00000370783.3	motile sperm domain containing 1	83
Details	674	96	hsa-miR-190a-3p	DLC1	DLC1 Rho GTPase activating protein									HINT3	ENST00000229633.5	histidine triad nucleotide binding protein 3	131
Details	675	96	hsa-miR-190a-3p	SEL1L	SEL1L, ERAD E3 ligase adaptor subunit									CNTNAP5	ENST00000431078.1	contactin associated protein-like 5	5
Details	676	96	hsa-miR-190a-3p	C5orf58	chromosome 5 open reading frame 58									HTR2B	ENST00000258400.3	5-hydroxytryptamine (serotonin) receptor 2B, G protein-coupled	5
Details	677	96	hsa-miR-190a-3p	DUSP16	dual specificity phosphatase 16									HOOK1	ENST00000371208.3	hook microtubule-tethering protein 1	804
Details	678	96	hsa-miR-190a-3p	PPP1R1C	protein phosphatase 1 regulatory inhibitor subunit 1C									ANAPC10	ENST00000507656.1	anaphase promoting complex subunit 10	46
Details	679	96	hsa-miR-190a-3p	MAN1A1	mannosidase alpha class 1A member 1									GLRA3	ENST00000274093.3	glycine receptor, alpha 3	5
Details	680	96	hsa-miR-190a-3p	GPN3	GPN-loop GTPase 3									FAM217A	ENST00000274673.3	family with sequence similarity 217, member A	5
Details	681	96	hsa-miR-190a-3p	PRKAR2B	protein kinase cAMP-dependent type II regulatory subunit beta									NDNL2	ENST00000332303.4	necdin-like 2	759
Details	682	96	hsa-miR-190a-3p	MYB	MYB proto-oncogene, transcription factor									DIAPH3	ENST00000400324.4	diaphanous-related formin 3	157
Details	683	96	hsa-miR-190a-3p	LRP11	LDL receptor related protein 11									OTUD1	ENST00000376495.3	OTU domain containing 1	710
Details	684	96	hsa-miR-190a-3p	C1GALT1	core 1 synthase, glycoprotein-N-acetylgalactosamine 3-beta-galactosyltransferase 1									C8orf46	ENST00000522977.1	chromosome 8 open reading frame 46	6
Details	685	96	hsa-miR-190a-3p	TM9SF3	transmembrane 9 superfamily member 3									DNMT3A	ENST00000380746.4	DNA (cytosine-5-)-methyltransferase 3 alpha	221
Details	686	96	hsa-miR-190a-3p	MMAB	metabolism of cobalamin associated B									PLEKHA5	ENST00000429027.2	pleckstrin homology domain containing, family A member 5	175
Details	687	96	hsa-miR-190a-3p	PDXDC1	pyridoxal dependent decarboxylase domain containing 1									GPR18	ENST00000397473.2	G protein-coupled receptor 18	5
Details	688	96	hsa-miR-190a-3p	COPS7A	COP9 signalosome subunit 7A									C5orf64	ENST00000505642.1	chromosome 5 open reading frame 64	5
Details	689	96	hsa-miR-190a-3p	NR2C2	nuclear receptor subfamily 2 group C member 2									OTX1	ENST00000366671.3	orthodenticle homeobox 1	11
Details	690	96	hsa-miR-190a-3p	ALG10B	ALG10B, alpha-1,2-glucosyltransferase									RNF170	ENST00000534961.1	ring finger protein 170	203
Details	691	96	hsa-miR-190a-3p	PCDH7	protocadherin 7									PHIP	ENST00000275034.4	pleckstrin homology domain interacting protein	668
Details	692	96	hsa-miR-190a-3p	EIF2AK3	eukaryotic translation initiation factor 2 alpha kinase 3									HAND1	ENST00000231121.2	heart and neural crest derivatives expressed 1	5
Details	693	96	hsa-miR-190a-3p	PLEKHG1	pleckstrin homology and RhoGEF domain containing G1									GNGT1	ENST00000455502.1	guanine nucleotide binding protein (G protein), gamma transducing activity polypeptide 1	5
Details	694	96	hsa-miR-190a-3p	RCC2	regulator of chromosome condensation 2									OSBPL9	ENST00000371710.3	oxysterol binding protein-like 9	4836
Details	695	96	hsa-miR-190a-3p	PER2	period circadian regulator 2									USP45	ENST00000392738.2	ubiquitin specific peptidase 45	491
Details	696	96	hsa-miR-190a-3p	WDR36	WD repeat domain 36									KIF3A	ENST00000378746.4	kinesin family member 3A	33
Details	697	96	hsa-miR-190a-3p	AP1B1	adaptor related protein complex 1 subunit beta 1									BTF3L4	ENST00000489308.2	basic transcription factor 3-like 4	1245
Details	698	96	hsa-miR-190a-3p	NIPBL	NIPBL, cohesin loading factor									UGT2A1	ENST00000514019.1	UDP glucuronosyltransferase 2 family, polypeptide A1, complex locus	5
Details	699	96	hsa-miR-190a-3p	MYO5B	myosin VB									FRMD6	ENST00000395718.2	FERM domain containing 6	508
Details	700	96	hsa-miR-190a-3p	ADAM22	ADAM metallopeptidase domain 22									PITPNB	ENST00000335272.5	phosphatidylinositol transfer protein, beta	80
Details	701	95	hsa-miR-190a-3p	VGLL3	vestigial like family member 3									L3MBTL3	ENST00000529410.1	l(3)mbt-like 3 (Drosophila)	60
Details	702	95	hsa-miR-190a-3p	WDHD1	WD repeat and HMG-box DNA binding protein 1									DYNLT3	ENST00000378581.3	dynein, light chain, Tctex-type 3	27
Details	703	95	hsa-miR-190a-3p	STARD13	StAR related lipid transfer domain containing 13									SLC10A2	ENST00000245312.3	solute carrier family 10 (sodium/bile acid cotransporter), member 2	5
Details	704	95	hsa-miR-190a-3p	ACBD5	acyl-CoA binding domain containing 5									RFESD	ENST00000513950.2	Rieske (Fe-S) domain containing	15
Details	705	95	hsa-miR-190a-3p	EMC2	ER membrane protein complex subunit 2									PREX2	ENST00000288368.4	phosphatidylinositol-3,4,5-trisphosphate-dependent Rac exchange factor 2	11
Details	706	95	hsa-miR-190a-3p	VGLL2	vestigial like family member 2									RFXAP	ENST00000255476.2	regulatory factor X-associated protein	682
Details	707	95	hsa-miR-190a-3p	ITPRID2	ITPR interacting domain containing 2									DCAF4L1	ENST00000333141.5	DDB1 and CUL4 associated factor 4-like 1	5
Details	708	95	hsa-miR-190a-3p	ARHGAP6	Rho GTPase activating protein 6									CCDC64B	ENST00000573514.1	coiled-coil domain containing 64B	5
Details	709	95	hsa-miR-190a-3p	FYB1	FYN binding protein 1									GRIN2B	ENST00000609686.1	glutamate receptor, ionotropic, N-methyl D-aspartate 2B	5
Details	710	95	hsa-miR-190a-3p	SAMD8	sterile alpha motif domain containing 8									SPRY3	ENST00000302805.2	sprouty homolog 3 (Drosophila)	5
Details	711	95	hsa-miR-190a-3p	MFAP5	microfibril associated protein 5									TOB1	ENST00000499247.2	transducer of ERBB2, 1	102
Details	712	95	hsa-miR-190a-3p	DEPDC1	DEP domain containing 1									IL1RAP	ENST00000072516.3	interleukin 1 receptor accessory protein	313
Details	713	95	hsa-miR-190a-3p	ZMYND11	zinc finger MYND-type containing 11									SAMD12	ENST00000409003.4	sterile alpha motif domain containing 12	57
Details	714	95	hsa-miR-190a-3p	NCOA3	nuclear receptor coactivator 3									KDM6A	ENST00000377967.4	lysine (K)-specific demethylase 6A	991
Details	715	95	hsa-miR-190a-3p	STUM	stum, mechanosensory transduction mediator homolog									ODF2L	ENST00000370566.3	outer dense fiber of sperm tails 2-like	149
Details	716	95	hsa-miR-190a-3p	PGM2L1	phosphoglucomutase 2 like 1									CD2AP	ENST00000359314.5	CD2-associated protein	145
Details	717	95	hsa-miR-190a-3p	CLUL1	clusterin like 1									HERPUD2	ENST00000396081.1	HERPUD family member 2	30
Details	718	95	hsa-miR-190a-3p	GID8	GID complex subunit 8 homolog									ISPD	ENST00000407010.2	isoprenoid synthase domain containing	12
Details	719	95	hsa-miR-190a-3p	YAF2	YY1 associated factor 2									HMGXB4	ENST00000216106.5	HMG box domain containing 4	966
Details	720	95	hsa-miR-190a-3p	KCNB1	potassium voltage-gated channel subfamily B member 1									HSPBAP1	ENST00000383659.1	HSPB (heat shock 27kDa) associated protein 1	22
Details	721	95	hsa-miR-190a-3p	UTY	ubiquitously transcribed tetratricopeptide repeat containing, Y-linked									LARP4	ENST00000398473.2	La ribonucleoprotein domain family, member 4	35
Details	722	95	hsa-miR-190a-3p	GPRASP1	G protein-coupled receptor associated sorting protein 1									FZD3	ENST00000240093.3	frizzled family receptor 3	192
Details	723	95	hsa-miR-190a-3p	POU2F1	POU class 2 homeobox 1									TTC21B	ENST00000243344.7	tetratricopeptide repeat domain 21B	445
Details	724	95	hsa-miR-190a-3p	CSGALNACT1	chondroitin sulfate N-acetylgalactosaminyltransferase 1									HOMER1	ENST00000508576.1	homer homolog 1 (Drosophila)	394
Details	725	95	hsa-miR-190a-3p	SMC2	structural maintenance of chromosomes 2									TANK	ENST00000457476.1	TRAF family member-associated NFKB activator	176
Details	726	95	hsa-miR-190a-3p	FAM111B	family with sequence similarity 111 member B									MS4A1	ENST00000534668.1	membrane-spanning 4-domains, subfamily A, member 1	5
Details	727	95	hsa-miR-190a-3p	CNEP1R1	CTD nuclear envelope phosphatase 1 regulatory subunit 1									SIX3	ENST00000260653.3	SIX homeobox 3	15
Details	728	95	hsa-miR-190a-3p	ELMOD2	ELMO domain containing 2									AL353791.1	ENST00000426179.1		5
Details	729	95	hsa-miR-190a-3p	ZCCHC12	zinc finger CCHC-type containing 12									ZNF83	ENST00000594682.2	zinc finger protein 83	78
Details	730	95	hsa-miR-190a-3p	SASS6	SAS-6 centriolar assembly protein									TM4SF1	ENST00000472441.1	transmembrane 4 L six family member 1	1401
Details	731	95	hsa-miR-190a-3p	TBC1D12	TBC1 domain family member 12									ISM1	ENST00000262487.4	isthmin 1, angiogenesis inhibitor	9
Details	732	95	hsa-miR-190a-3p	COA5	cytochrome c oxidase assembly factor 5									CLVS2	ENST00000275162.5	clavesin 2	19
Details	733	95	hsa-miR-190a-3p	TPR	translocated promoter region, nuclear basket protein									NPPB	ENST00000376468.3	natriuretic peptide B	12
Details	734	95	hsa-miR-190a-3p	SLC45A4	solute carrier family 45 member 4									TXLNB	ENST00000358430.3	taxilin beta	5
Details	735	95	hsa-miR-190a-3p	DCUN1D3	defective in cullin neddylation 1 domain containing 3									LDHAL6B	ENST00000307144.4	lactate dehydrogenase A-like 6B	5
Details	736	95	hsa-miR-190a-3p	HOXA9	homeobox A9									CCL7	ENST00000394630.3	chemokine (C-C motif) ligand 7	5
Details	737	95	hsa-miR-190a-3p	TAB3	TGF-beta activated kinase 1 (MAP3K7) binding protein 3									PCMTD1	ENST00000360540.5	protein-L-isoaspartate (D-aspartate) O-methyltransferase domain containing 1	136
Details	738	95	hsa-miR-190a-3p	PCNX1	pecanex 1									SMAD2	ENST00000262160.6	SMAD family member 2	1196
Details	739	95	hsa-miR-190a-3p	SNRK	SNF related kinase									MANBA	ENST00000226578.4	mannosidase, beta A, lysosomal	1062
Details	740	95	hsa-miR-190a-3p	TTC7A	tetratricopeptide repeat domain 7A									RFK	ENST00000376736.1	riboflavin kinase	797
Details	741	95	hsa-miR-190a-3p	UBA6	ubiquitin like modifier activating enzyme 6									C4orf29	ENST00000388795.5	chromosome 4 open reading frame 29	67
Details	742	95	hsa-miR-190a-3p	ZNF280C	zinc finger protein 280C									CCDC82	ENST00000278520.5	coiled-coil domain containing 82	224
Details	743	95	hsa-miR-190a-3p	HRK	harakiri, BCL2 interacting protein									FAM73A	ENST00000370791.3	family with sequence similarity 73, member A	837
Details	744	95	hsa-miR-190a-3p	ZNF521	zinc finger protein 521									SP1	ENST00000426431.2	Sp1 transcription factor	402
Details	745	95	hsa-miR-190a-3p	ATP1B2	ATPase Na+/K+ transporting subunit beta 2									SSFA2	ENST00000431877.2	sperm specific antigen 2	1434
Details	746	95	hsa-miR-190a-3p	RIC8B	RIC8 guanine nucleotide exchange factor B									TADA1	ENST00000367874.4	transcriptional adaptor 1	160
Details	747	95	hsa-miR-190a-3p	UBE2H	ubiquitin conjugating enzyme E2 H									CACNB2	ENST00000396576.2	calcium channel, voltage-dependent, beta 2 subunit	52
Details	748	95	hsa-miR-190a-3p	CDC14A	cell division cycle 14A									CCDC15	ENST00000344762.5	coiled-coil domain containing 15	134
Details	749	95	hsa-miR-190a-3p	OSGIN2	oxidative stress induced growth inhibitor family member 2									PAPPA	ENST00000328252.3	pregnancy-associated plasma protein A, pappalysin 1	350
Details	750	95	hsa-miR-190a-3p	LRRC2	leucine rich repeat containing 2									PLXDC2	ENST00000377252.4	plexin domain containing 2	506
Details	751	95	hsa-miR-190a-3p	IL6ST	interleukin 6 signal transducer									BTBD19	ENST00000453418.1	BTB (POZ) domain containing 19	61
Details	752	95	hsa-miR-190a-3p	ZSWIM8	zinc finger SWIM-type containing 8									PIK3CB	ENST00000477593.1	phosphatidylinositol-4,5-bisphosphate 3-kinase, catalytic subunit beta	437
Details	753	95	hsa-miR-190a-3p	HS2ST1	heparan sulfate 2-O-sulfotransferase 1									ZNF365	ENST00000395254.3	zinc finger protein 365	173
Details	754	95	hsa-miR-190a-3p	HCFC2	host cell factor C2									TAF1B	ENST00000263663.5	TATA box binding protein (TBP)-associated factor, RNA polymerase I, B, 63kDa	214
Details	755	95	hsa-miR-190a-3p	NPAS3	neuronal PAS domain protein 3									DEPDC7	ENST00000241051.3	DEP domain containing 7	332
Details	756	95	hsa-miR-190a-3p	MID2	midline 2									ALG11	ENST00000523764.1	ALG11, alpha-1,2-mannosyltransferase	121
Details	757	95	hsa-miR-190a-3p	CLVS2	clavesin 2									LHX9	ENST00000367390.3	LIM homeobox 9	40
Details	758	95	hsa-miR-190a-3p	ELOVL7	ELOVL fatty acid elongase 7									PCP4L1	ENST00000504449.1	Purkinje cell protein 4 like 1	23
Details	759	94	hsa-miR-190a-3p	ABHD13	abhydrolase domain containing 13									MT-ND5	ENST00000361567.2	mitochondrially encoded NADH dehydrogenase 5	675
Details	760	94	hsa-miR-190a-3p	ST8SIA2	ST8 alpha-N-acetyl-neuraminide alpha-2,8-sialyltransferase 2									DUS4L	ENST00000265720.3	dihydrouridine synthase 4-like (S. cerevisiae)	101
Details	761	94	hsa-miR-190a-3p	PLXNA2	plexin A2									INTS8	ENST00000523731.1	integrator complex subunit 8	554
Details	762	94	hsa-miR-190a-3p	CCDC71L	coiled-coil domain containing 71 like									FGD4	ENST00000427716.2	FYVE, RhoGEF and PH domain containing 4	38
Details	763	94	hsa-miR-190a-3p	IP6K1	inositol hexakisphosphate kinase 1									PRIMPOL	ENST00000515774.1	primase and polymerase (DNA-directed)	1417
Details	764	94	hsa-miR-190a-3p	SBNO1	strawberry notch homolog 1									COPS7A	ENST00000534947.1	COP9 signalosome subunit 7A	124
Details	765	94	hsa-miR-190a-3p	PLD5	phospholipase D family member 5									RGCC	ENST00000379359.3	regulator of cell cycle	1619
Details	766	94	hsa-miR-190a-3p	LIN7A	lin-7 homolog A, crumbs cell polarity complex component									C4orf36	ENST00000473559.1	chromosome 4 open reading frame 36	5
Details	767	94	hsa-miR-190a-3p	PIAS1	protein inhibitor of activated STAT 1									GPR115	ENST00000371220.1	G protein-coupled receptor 115	8
Details	768	94	hsa-miR-190a-3p	TP63	tumor protein p63									ANXA5	ENST00000296511.5	annexin A5	9387
Details	769	94	hsa-miR-190a-3p	BRMS1L	BRMS1 like transcriptional repressor									SMN2	ENST00000380743.4	survival of motor neuron 2, centromeric	5
Details	770	94	hsa-miR-190a-3p	RBP3	retinol binding protein 3									GABRB2	ENST00000393959.1	gamma-aminobutyric acid (GABA) A receptor, beta 2	5
Details	771	94	hsa-miR-190a-3p	CXCL12	C-X-C motif chemokine ligand 12									ATG10	ENST00000282185.3	autophagy related 10	25
Details	772	94	hsa-miR-190a-3p	NAALAD2	N-acetylated alpha-linked acidic dipeptidase 2									BRMS1L	ENST00000216807.7	breast cancer metastasis-suppressor 1-like	230
Details	773	94	hsa-miR-190a-3p	RAPGEF5	Rap guanine nucleotide exchange factor 5									BMPER	ENST00000297161.2	BMP binding endothelial regulator	723
Details	774	94	hsa-miR-190a-3p	NOTCH3	notch 3									ZNF174	ENST00000268655.4	zinc finger protein 174	787
Details	775	94	hsa-miR-190a-3p	POLR2K	RNA polymerase II subunit K									C12orf75	ENST00000443585.1	chromosome 12 open reading frame 75	6680
Details	776	94	hsa-miR-190a-3p	ATF7IP	activating transcription factor 7 interacting protein									TET2	ENST00000545826.1	tet methylcytosine dioxygenase 2	558
Details	777	94	hsa-miR-190a-3p	GABRG2	gamma-aminobutyric acid type A receptor gamma2 subunit									HDC	ENST00000267845.3	histidine decarboxylase	5
Details	778	94	hsa-miR-190a-3p	ORC4	origin recognition complex subunit 4									WDR63	ENST00000370596.1	WD repeat domain 63	5
Details	779	94	hsa-miR-190a-3p	LPCAT4	lysophosphatidylcholine acyltransferase 4									PCDH8	ENST00000377942.3	protocadherin 8	11
Details	780	94	hsa-miR-190a-3p	RUNX2	runt related transcription factor 2									HIGD1A	ENST00000321331.7	HIG1 hypoxia inducible domain family, member 1A	254
Details	781	94	hsa-miR-190a-3p	NDFIP2	Nedd4 family interacting protein 2									FAM24A	ENST00000368894.1	family with sequence similarity 24, member A	5
Details	782	94	hsa-miR-190a-3p	ANTXR2	ANTXR cell adhesion molecule 2									SIMC1	ENST00000443967.1	SUMO-interacting motifs containing 1	75
Details	783	94	hsa-miR-190a-3p	ADD3	adducin 3									BACH2	ENST00000257749.4	BTB and CNC homology 1, basic leucine zipper transcription factor 2	74
Details	784	94	hsa-miR-190a-3p	NTRK2	neurotrophic receptor tyrosine kinase 2									CDC14A	ENST00000370125.2	cell division cycle 14A	123
Details	785	94	hsa-miR-190a-3p	GVQW3	GVQW motif containing 3									ZCCHC18	ENST00000537356.3	zinc finger, CCHC domain containing 18	17
Details	786	94	hsa-miR-190a-3p	NKAIN3	sodium/potassium transporting ATPase interacting 3									ATP2B2	ENST00000352432.4	ATPase, Ca++ transporting, plasma membrane 2	170
Details	787	94	hsa-miR-190a-3p	WFDC8	WAP four-disulfide core domain 8									THBS4	ENST00000350881.2	thrombospondin 4	642
Details	788	94	hsa-miR-190a-3p	CCDC50	coiled-coil domain containing 50									ZBTB16	ENST00000335953.4	zinc finger and BTB domain containing 16	73
Details	789	94	hsa-miR-190a-3p	ZNF37A	zinc finger protein 37A									ATL2	ENST00000406122.1	atlastin GTPase 2	1135
Details	790	94	hsa-miR-190a-3p	BMPR1B	bone morphogenetic protein receptor type 1B									BVES	ENST00000314641.5	blood vessel epicardial substance	30
Details	791	94	hsa-miR-190a-3p	ASCC3	activating signal cointegrator 1 complex subunit 3									HTR2A	ENST00000378688.4	5-hydroxytryptamine (serotonin) receptor 2A, G protein-coupled	5
Details	792	94	hsa-miR-190a-3p	MEGF11	multiple EGF like domains 11									ZNF675	ENST00000359788.4	zinc finger protein 675	81
Details	793	94	hsa-miR-190a-3p	DCLK1	doublecortin like kinase 1									ZNF790	ENST00000356725.4	zinc finger protein 790	18
Details	794	94	hsa-miR-190a-3p	CHST2	carbohydrate sulfotransferase 2									RORA	ENST00000335670.6	RAR-related orphan receptor A	102
Details	795	94	hsa-miR-190a-3p	ELMO2	engulfment and cell motility 2									RABGGTB	ENST00000319942.3	Rab geranylgeranyltransferase, beta subunit	1644
Details	796	94	hsa-miR-190a-3p	DGKH	diacylglycerol kinase eta									PRG4	ENST00000367483.4	proteoglycan 4	5
Details	797	94	hsa-miR-190a-3p	KBTBD6	kelch repeat and BTB domain containing 6									DYNAP	ENST00000321600.1	dynactin associated protein	5
Details	798	93	hsa-miR-190a-3p	EFNA3	ephrin A3									ZNF655	ENST00000425063.1	zinc finger protein 655	709
Details	799	93	hsa-miR-190a-3p	EFNA2	ephrin A2									SCRN3	ENST00000272732.6	secernin 3	80
Details	800	93	hsa-miR-190a-3p	LZTFL1	leucine zipper transcription factor like 1									VSTM2A	ENST00000407838.3	V-set and transmembrane domain containing 2A	5
Details	801	93	hsa-miR-190a-3p	USP51	ubiquitin specific peptidase 51									ELP4	ENST00000395934.2	elongator acetyltransferase complex subunit 4	282
Details	802	93	hsa-miR-190a-3p	TET1	tet methylcytosine dioxygenase 1									PPARGC1A	ENST00000264867.2	peroxisome proliferator-activated receptor gamma, coactivator 1 alpha	19
Details	803	93	hsa-miR-190a-3p	PLXNA1	plexin A1									PTPRE	ENST00000254667.3	protein tyrosine phosphatase, receptor type, E	44
Details	804	93	hsa-miR-190a-3p	CEP126	centrosomal protein 126									ITPRIPL2	ENST00000381440.3	inositol 1,4,5-trisphosphate receptor interacting protein-like 2	893
Details	805	93	hsa-miR-190a-3p	SYT11	synaptotagmin 11									KLHL14	ENST00000359358.4	kelch-like family member 14	66
Details	806	93	hsa-miR-190a-3p	ABI1	abl interactor 1									CETN3	ENST00000283122.3	centrin, EF-hand protein, 3	498
Details	807	93	hsa-miR-190a-3p	ERBIN	erbb2 interacting protein									C9orf72	ENST00000380003.3	chromosome 9 open reading frame 72	25
Details	808	93	hsa-miR-190a-3p	PDE12	phosphodiesterase 12									NUDT15	ENST00000258662.2	nudix (nucleoside diphosphate linked moiety X)-type motif 15	16
Details	809	93	hsa-miR-190a-3p	AHR	aryl hydrocarbon receptor									PATE1	ENST00000305738.5	prostate and testis expressed 1	5
Details	810	93	hsa-miR-190a-3p	USP9X	ubiquitin specific peptidase 9 X-linked									VAMP4	ENST00000236192.7	vesicle-associated membrane protein 4	282
Details	811	93	hsa-miR-190a-3p	SHOC2	SHOC2, leucine rich repeat scaffold protein									MERTK	ENST00000295408.4	c-mer proto-oncogene tyrosine kinase	31
Details	812	93	hsa-miR-190a-3p	DOP1A	DOP1 leucine zipper like protein A									AC069547.2	ENST00000596442.1	Uncharacterized protein	5
Details	813	93	hsa-miR-190a-3p	CHSY3	chondroitin sulfate synthase 3									ITIH2	ENST00000358415.4	inter-alpha-trypsin inhibitor heavy chain 2	174
Details	814	93	hsa-miR-190a-3p	ATF1	activating transcription factor 1									IARS2	ENST00000366922.1	isoleucyl-tRNA synthetase 2, mitochondrial	2978
Details	815	93	hsa-miR-190a-3p	NUMB	NUMB, endocytic adaptor protein									KIAA0825	ENST00000513200.3	KIAA0825	34
Details	816	93	hsa-miR-190a-3p	JMJD1C	jumonji domain containing 1C									OR2C3	ENST00000366487.3	olfactory receptor, family 2, subfamily C, member 3	5
Details	817	93	hsa-miR-190a-3p	CANX	calnexin									ZBTB34	ENST00000319119.4	zinc finger and BTB domain containing 34	726
Details	818	93	hsa-miR-190a-3p	SYNGR1	synaptogyrin 1									MTPN	ENST00000393085.3	myotrophin	1296
Details	819	93	hsa-miR-190a-3p	ACSL4	acyl-CoA synthetase long chain family member 4									HOXD4	ENST00000306324.3	homeobox D4	214
Details	820	93	hsa-miR-190a-3p	ETS1	ETS proto-oncogene 1, transcription factor									ETS1	ENST00000531611.1	v-ets avian erythroblastosis virus E26 oncogene homolog 1	1423
Details	821	93	hsa-miR-190a-3p	POU4F2	POU class 4 homeobox 2									HOXA11	ENST00000006015.3	homeobox A11	133
Details	822	93	hsa-miR-190a-3p	PPP3R1	protein phosphatase 3 regulatory subunit B, alpha									LRP6	ENST00000261349.4	low density lipoprotein receptor-related protein 6	157
Details	823	93	hsa-miR-190a-3p	SPACA4	sperm acrosome associated 4									TGFBR2	ENST00000359013.4	transforming growth factor, beta receptor II (70/80kDa)	2168
Details	824	93	hsa-miR-190a-3p	HAND1	heart and neural crest derivatives expressed 1									ERRFI1	ENST00000377482.5	ERBB receptor feedback inhibitor 1	3807
Details	825	93	hsa-miR-190a-3p	FAM237A	family with sequence similarity 237 member A									MYL12B	ENST00000237500.5	myosin, light chain 12B, regulatory	1944
Details	826	93	hsa-miR-190a-3p	PLA2R1	phospholipase A2 receptor 1									IRF2BP2	ENST00000366610.3	interferon regulatory factor 2 binding protein 2	8690
Details	827	93	hsa-miR-190a-3p	CXADR	CXADR, Ig-like cell adhesion molecule									ING2	ENST00000302327.3	inhibitor of growth family, member 2	193
Details	828	93	hsa-miR-190a-3p	USP25	ubiquitin specific peptidase 25									SCN11A	ENST00000302328.3	sodium channel, voltage-gated, type XI, alpha subunit	5
Details	829	93	hsa-miR-190a-3p	LIMK2	LIM domain kinase 2									TTC39B	ENST00000512701.2	tetratricopeptide repeat domain 39B	161
Details	830	93	hsa-miR-190a-3p	VANGL2	VANGL planar cell polarity protein 2									IDH3A	ENST00000299518.2	isocitrate dehydrogenase 3 (NAD+) alpha	915
Details	831	93	hsa-miR-190a-3p	ZFR	zinc finger RNA binding protein									TRPM3	ENST00000377110.3	transient receptor potential cation channel, subfamily M, member 3	11
Details	832	93	hsa-miR-190a-3p	AP1AR	adaptor related protein complex 1 associated regulatory protein									HDAC4	ENST00000345617.3	histone deacetylase 4	48
Details	833	93	hsa-miR-190a-3p	CAPN12	calpain 12									NRXN1	ENST00000342183.5	neurexin 1	5
Details	834	93	hsa-miR-190a-3p	UCK2	uridine-cytidine kinase 2									EDNRA	ENST00000339690.5	endothelin receptor type A	35
Details	835	93	hsa-miR-190a-3p	KDM5A	lysine demethylase 5A									LIN28B	ENST00000345080.4	lin-28 homolog B (C. elegans)	118
Details	836	93	hsa-miR-190a-3p	ID2	inhibitor of DNA binding 2									AC023632.1	ENST00000391679.1	HCG2009141; PRO2397; Uncharacterized protein	5
Details	837	93	hsa-miR-190a-3p	SIKE1	suppressor of IKBKE 1									CCDC102A	ENST00000258214.2	coiled-coil domain containing 102A	481
Details	838	93	hsa-miR-190a-3p	WWP1	WW domain containing E3 ubiquitin protein ligase 1									SDHD	ENST00000526592.1	succinate dehydrogenase complex, subunit D, integral membrane protein	62
Details	839	93	hsa-miR-190a-3p	ABCC5	ATP binding cassette subfamily C member 5									PIK3CA	ENST00000263967.3	phosphatidylinositol-4,5-bisphosphate 3-kinase, catalytic subunit alpha	112
Details	840	93	hsa-miR-190a-3p	PLXNC1	plexin C1									ZNF660	ENST00000322734.2	zinc finger protein 660	5
Details	841	93	hsa-miR-190a-3p	CYP2U1	cytochrome P450 family 2 subfamily U member 1									SPATA18	ENST00000295213.4	spermatogenesis associated 18	19
Details	842	92	hsa-miR-190a-3p	CREBBP	CREB binding protein									SMN1	ENST00000506163.1	survival of motor neuron 1, telomeric	5
Details	843	92	hsa-miR-190a-3p	ARFGEF3	ARFGEF family member 3									CXCL6	ENST00000226317.5	chemokine (C-X-C motif) ligand 6	26
Details	844	92	hsa-miR-190a-3p	COL5A1	collagen type V alpha 1 chain									PDE3A	ENST00000359062.3	phosphodiesterase 3A, cGMP-inhibited	1182
Details	845	92	hsa-miR-190a-3p	SEC24B	SEC24 homolog B, COPII coat complex component									SLC7A11	ENST00000280612.5	solute carrier family 7 (anionic amino acid transporter light chain, xc- system), member 11	61
Details	846	92	hsa-miR-190a-3p	DCUN1D1	defective in cullin neddylation 1 domain containing 1									VGLL3	ENST00000398399.2	vestigial like 3 (Drosophila)	187
Details	847	92	hsa-miR-190a-3p	DMC1	DNA meiotic recombinase 1									FLI1	ENST00000527786.2	Fli-1 proto-oncogene, ETS transcription factor	116
Details	848	92	hsa-miR-190a-3p	ONECUT2	one cut homeobox 2									GBE1	ENST00000429644.2	glucan (1,4-alpha-), branching enzyme 1	652
Details	849	92	hsa-miR-190a-3p	UGT2A1	UDP glucuronosyltransferase family 2 member A1 complex locus									SOCS4	ENST00000395472.2	suppressor of cytokine signaling 4	336
Details	850	92	hsa-miR-190a-3p	ETV1	ETS variant 1									VHLL	ENST00000339922.3	von Hippel-Lindau tumor suppressor-like	18
Details	851	92	hsa-miR-190a-3p	FREM2	FRAS1 related extracellular matrix protein 2									C10orf118	ENST00000543782.1	chromosome 10 open reading frame 118	146
Details	852	92	hsa-miR-190a-3p	SLC25A40	solute carrier family 25 member 40									ZBTB7A	ENST00000322357.4	zinc finger and BTB domain containing 7A	37
Details	853	92	hsa-miR-190a-3p	GYPA	glycophorin A (MNS blood group)									ALG10	ENST00000266483.2	ALG10, alpha-1,2-glucosyltransferase	13
Details	854	92	hsa-miR-190a-3p	MST1L	macrophage stimulating 1 like									L2HGDH	ENST00000267436.4	L-2-hydroxyglutarate dehydrogenase	893
Details	855	92	hsa-miR-190a-3p	OSBPL9	oxysterol binding protein like 9									HDHD1	ENST00000381077.5	haloacid dehalogenase-like hydrolase domain containing 1	32
Details	856	92	hsa-miR-190a-3p	BNIP2	BCL2 interacting protein 2									NECAB1	ENST00000417640.2	N-terminal EF-hand calcium binding protein 1	5
Details	857	92	hsa-miR-190a-3p	TMEM47	transmembrane protein 47									CKS2	ENST00000314355.6	CDC28 protein kinase regulatory subunit 2	1187
Details	858	92	hsa-miR-190a-3p	TXLNB	taxilin beta									TMEM56	ENST00000370203.4	transmembrane protein 56	113
Details	859	92	hsa-miR-190a-3p	SHPRH	SNF2 histone linker PHD RING helicase									TIGD4	ENST00000304337.2	tigger transposable element derived 4	9
Details	860	92	hsa-miR-190a-3p	EDA	ectodysplasin A									RRP15	ENST00000366932.3	ribosomal RNA processing 15 homolog (S. cerevisiae)	243
Details	861	92	hsa-miR-190a-3p	SLC1A1	solute carrier family 1 member 1									SPIN3	ENST00000374919.3	spindlin family, member 3	12
Details	862	92	hsa-miR-190a-3p	INSIG2	insulin induced gene 2									LRRC70	ENST00000334994.5	leucine rich repeat containing 70	7
Details	863	92	hsa-miR-190a-3p	IFT80	intraflagellar transport 80									FBXL16	ENST00000397621.1	F-box and leucine-rich repeat protein 16	5
Details	864	92	hsa-miR-190a-3p	CALHM4	calcium homeostasis modulator family member 4									IGSF9B	ENST00000533871.2	immunoglobulin superfamily, member 9B	5
Details	865	92	hsa-miR-190a-3p	SAMD13	sterile alpha motif domain containing 13									TACR3	ENST00000304883.2	tachykinin receptor 3	5
Details	866	92	hsa-miR-190a-3p	RAB11FIP2	RAB11 family interacting protein 2									ZNF569	ENST00000392149.2	zinc finger protein 569	34
Details	867	92	hsa-miR-190a-3p	CCDC126	coiled-coil domain containing 126									C17orf67	ENST00000397861.2	chromosome 17 open reading frame 67	5
Details	868	92	hsa-miR-190a-3p	ARL8A	ADP ribosylation factor like GTPase 8A									LIX1L	ENST00000369308.3	Lix1 homolog (mouse)-like	695
Details	869	92	hsa-miR-190a-3p	SH3TC2	SH3 domain and tetratricopeptide repeats 2									ETV6	ENST00000396373.4	ets variant 6	44
Details	870	92	hsa-miR-190a-3p	EDAR	ectodysplasin A receptor									MKLN1	ENST00000352689.6	muskelin 1, intracellular mediator containing kelch motifs	477
Details	871	92	hsa-miR-190a-3p	MECP2	methyl-CpG binding protein 2									PUM1	ENST00000424085.2	pumilio RNA-binding family member 1	202
Details	872	92	hsa-miR-190a-3p	ANO5	anoctamin 5									PCSK2	ENST00000377899.1	proprotein convertase subtilisin/kexin type 2	9
Details	873	92	hsa-miR-190a-3p	DEGS1	delta 4-desaturase, sphingolipid 1									SLC1A2	ENST00000278379.3	solute carrier family 1 (glial high affinity glutamate transporter), member 2	5
Details	874	92	hsa-miR-190a-3p	FBXW7	F-box and WD repeat domain containing 7									DLL1	ENST00000366756.3	delta-like 1 (Drosophila)	85
Details	875	92	hsa-miR-190a-3p	HORMAD1	HORMA domain containing 1									UNC5A	ENST00000261961.3	unc-5 homolog A (C. elegans)	7
Details	876	92	hsa-miR-190a-3p	FOXN2	forkhead box N2									CLPX	ENST00000300107.3	caseinolytic mitochondrial matrix peptidase chaperone subunit	251
Details	877	92	hsa-miR-190a-3p	UGT2A2	UDP glucuronosyltransferase family 2 member A2									SV2B	ENST00000394232.1	synaptic vesicle glycoprotein 2B	7
Details	878	92	hsa-miR-190a-3p	TRAF5	TNF receptor associated factor 5									GNB1	ENST00000378609.4	guanine nucleotide binding protein (G protein), beta polypeptide 1	3695
Details	879	92	hsa-miR-190a-3p	NF1	neurofibromin 1									VPS36	ENST00000378060.4	vacuolar protein sorting 36 homolog (S. cerevisiae)	57
Details	880	92	hsa-miR-190a-3p	CCL8	C-C motif chemokine ligand 8									TTLL7	ENST00000260505.8	tubulin tyrosine ligase-like family, member 7	93
Details	881	92	hsa-miR-190a-3p	ARGFX	arginine-fifty homeobox									DSC2	ENST00000251081.6	desmocollin 2	145
Details	882	92	hsa-miR-190a-3p	TMPRSS11B	transmembrane serine protease 11B									PDCD4	ENST00000280154.7	programmed cell death 4 (neoplastic transformation inhibitor)	612
Details	883	92	hsa-miR-190a-3p	YWHAG	tyrosine 3-monooxygenase/tryptophan 5-monooxygenase activation protein gamma									SENP1	ENST00000004980.5	SUMO1/sentrin specific peptidase 1	361
Details	884	92	hsa-miR-190a-3p	TMEM106B	transmembrane protein 106B									TMEM215	ENST00000342743.5	transmembrane protein 215	5
Details	885	92	hsa-miR-190a-3p	MMS22L	MMS22 like, DNA repair protein									AFMID	ENST00000588800.1	arylformamidase	538
Details	886	92	hsa-miR-190a-3p	KIDINS220	kinase D interacting substrate 220									ATP2B4	ENST00000367218.3	ATPase, Ca++ transporting, plasma membrane 4	7311
Details	887	92	hsa-miR-190a-3p	PLCB4	phospholipase C beta 4									SSB	ENST00000260956.4	Sjogren syndrome antigen B (autoantigen La)	373
Details	888	92	hsa-miR-190a-3p	FRMD3	FERM domain containing 3									GPRIN3	ENST00000609438.1	GPRIN family member 3	213
Details	889	92	hsa-miR-190a-3p	TEAD1	TEA domain transcription factor 1									GYPA	ENST00000360771.4	glycophorin A (MNS blood group)	5
Details	890	91	hsa-miR-190a-3p	MTCH2	mitochondrial carrier 2									ESRRG	ENST00000361525.3	estrogen-related receptor gamma	5
Details	891	91	hsa-miR-190a-3p	N4BP1	NEDD4 binding protein 1									TFEC	ENST00000265440.7	transcription factor EC	5
Details	892	91	hsa-miR-190a-3p	MAGI1	membrane associated guanylate kinase, WW and PDZ domain containing 1									KIAA0020	ENST00000397885.2	KIAA0020	78
Details	893	91	hsa-miR-190a-3p	STYX	serine/threonine/tyrosine interacting protein									RSPH10B	ENST00000539903.1	radial spoke head 10 homolog B (Chlamydomonas)	5
Details	894	91	hsa-miR-190a-3p	CAPZA2	capping actin protein of muscle Z-line subunit alpha 2									LSM12	ENST00000585388.1	LSM12 homolog (S. cerevisiae)	20
Details	895	91	hsa-miR-190a-3p	PAX7	paired box 7									DEK	ENST00000397239.3	DEK oncogene	561
Details	896	91	hsa-miR-190a-3p	DNAJC13	DnaJ heat shock protein family (Hsp40) member C13									IL6	ENST00000404625.1	interleukin 6 (interferon, beta 2)	472
Details	897	91	hsa-miR-190a-3p	COMMD6	COMM domain containing 6									MAGEA4	ENST00000276344.2	melanoma antigen family A, 4	5
Details	898	91	hsa-miR-190a-3p	IQSEC2	IQ motif and Sec7 domain 2									MTERFD1	ENST00000523821.1	MTERF domain containing 1	48
Details	899	91	hsa-miR-190a-3p	CHM	CHM, Rab escort protein 1									ZNF273	ENST00000545510.1	zinc finger protein 273	724
Details	900	91	hsa-miR-190a-3p	NANP	N-acetylneuraminic acid phosphatase									RDH8	ENST00000591589.1	retinol dehydrogenase 8 (all-trans)	5
Details	901	91	hsa-miR-190a-3p	BOD1L1	biorientation of chromosomes in cell division 1 like 1									TMEM236	ENST00000480516.1		5
Details	902	91	hsa-miR-190a-3p	EMP2	epithelial membrane protein 2									TMEM236	ENST00000377495.1	transmembrane protein 236	5
Details	903	91	hsa-miR-190a-3p	EDIL3	EGF like repeats and discoidin domains 3									CD200	ENST00000315711.8	CD200 molecule	5
Details	904	91	hsa-miR-190a-3p	LMBR1	limb development membrane protein 1									CBLN1	ENST00000219197.6	cerebellin 1 precursor	12
Details	905	91	hsa-miR-190a-3p	ZCCHC18	zinc finger CCHC-type containing 18									RP11-67H2.1	ENST00000521500.2	Uncharacterized protein	5
Details	906	91	hsa-miR-190a-3p	CAAP1	caspase activity and apoptosis inhibitor 1									MEMO1	ENST00000295065.5	mediator of cell motility 1	89
Details	907	91	hsa-miR-190a-3p	BRWD3	bromodomain and WD repeat domain containing 3									IL6ST	ENST00000381287.4	interleukin 6 signal transducer (gp130, oncostatin M receptor)	213
Details	908	91	hsa-miR-190a-3p	GPCPD1	glycerophosphocholine phosphodiesterase 1									PAFAH1B2	ENST00000527958.1	platelet-activating factor acetylhydrolase 1b, catalytic subunit 2 (30kDa)	180
Details	909	91	hsa-miR-190a-3p	REL	REL proto-oncogene, NF-kB subunit									EIF2AK2	ENST00000233057.4	eukaryotic translation initiation factor 2-alpha kinase 2	292
Details	910	91	hsa-miR-190a-3p	USP37	ubiquitin specific peptidase 37									SDPR	ENST00000304141.4	serum deprivation response	38
Details	911	91	hsa-miR-190a-3p	GTPBP10	GTP binding protein 10									CA8	ENST00000317995.4	carbonic anhydrase VIII	197
Details	912	91	hsa-miR-190a-3p	NPY2R	neuropeptide Y receptor Y2									SLK	ENST00000335753.4	STE20-like kinase	260
Details	913	91	hsa-miR-190a-3p	ZNF681	zinc finger protein 681									HES7	ENST00000541682.2	hairy and enhancer of split 7 (Drosophila)	416
Details	914	91	hsa-miR-190a-3p	DEK	DEK proto-oncogene									TMEM59L	ENST00000600490.1	transmembrane protein 59-like	33
Details	915	91	hsa-miR-190a-3p	OPN5	opsin 5									ELOVL7	ENST00000508821.1	ELOVL fatty acid elongase 7	52
Details	916	91	hsa-miR-190a-3p	PLEKHG7	pleckstrin homology and RhoGEF domain containing G7									WDR35	ENST00000281405.4	WD repeat domain 35	30
Details	917	91	hsa-miR-190a-3p	CENPK	centromere protein K									ANGPTL2	ENST00000373425.3	angiopoietin-like 2	39
Details	918	91	hsa-miR-190a-3p	ZNF568	zinc finger protein 568									ATP7A	ENST00000343533.5	ATPase, Cu++ transporting, alpha polypeptide	141
Details	919	91	hsa-miR-190a-3p	YBX3	Y-box binding protein 3									HSPE1-MOB4	ENST00000604458.1	HSPE1-MOB4 readthrough	123
Details	920	91	hsa-miR-190a-3p	EDEM3	ER degradation enhancing alpha-mannosidase like protein 3									SLCO4A1	ENST00000217159.1	solute carrier organic anion transporter family, member 4A1	115
Details	921	91	hsa-miR-190a-3p	PLPP3	phospholipid phosphatase 3									NCEH1	ENST00000475381.1	neutral cholesterol ester hydrolase 1	1779
Details	922	91	hsa-miR-190a-3p	PPIL4	peptidylprolyl isomerase like 4									FBXO48	ENST00000377957.3	F-box protein 48	13
Details	923	91	hsa-miR-190a-3p	AIG1	androgen induced 1									DSG4	ENST00000359747.4	desmoglein 4	5
Details	924	91	hsa-miR-190a-3p	AP1S1	adaptor related protein complex 1 subunit sigma 1									CDKN3	ENST00000556102.2	cyclin-dependent kinase inhibitor 3	833
Details	925	91	hsa-miR-190a-3p	RARB	retinoic acid receptor beta									SFTA3	ENST00000518529.2	surfactant associated 3	5
Details	926	91	hsa-miR-190a-3p	EN2	engrailed homeobox 2									GBP5	ENST00000343435.5	guanylate binding protein 5	5
Details	927	91	hsa-miR-190a-3p	GRXCR1	glutaredoxin and cysteine rich domain containing 1									ARL5B	ENST00000377275.3	ADP-ribosylation factor-like 5B	368
Details	928	91	hsa-miR-190a-3p	DNAJB12	DnaJ heat shock protein family (Hsp40) member B12									TAOK1	ENST00000261716.3	TAO kinase 1	164
Details	929	91	hsa-miR-190a-3p	FGF12	fibroblast growth factor 12									EVA1A	ENST00000393913.3	eva-1 homolog A (C. elegans)	45
Details	930	91	hsa-miR-190a-3p	ZHX3	zinc fingers and homeoboxes 3									MAP3K2	ENST00000409947.1	mitogen-activated protein kinase kinase kinase 2	187
Details	931	91	hsa-miR-190a-3p	SNRNP48	small nuclear ribonucleoprotein U11/U12 subunit 48									SCN8A	ENST00000354534.6	sodium channel, voltage gated, type VIII, alpha subunit	44
Details	932	91	hsa-miR-190a-3p	ATP7A	ATPase copper transporting alpha									BAI2	ENST00000398556.3	brain-specific angiogenesis inhibitor 2	30
Details	933	91	hsa-miR-190a-3p	SCPEP1	serine carboxypeptidase 1									PRRC2C	ENST00000367742.3	proline-rich coiled-coil 2C	5
Details	934	91	hsa-miR-190a-3p	PLCXD1	phosphatidylinositol specific phospholipase C X domain containing 1									MT1X	ENST00000394485.4	metallothionein 1X	63
Details	935	91	hsa-miR-190a-3p	UTP23	UTP23, small subunit processome component									SPEN	ENST00000375759.3	spen homolog, transcriptional regulator (Drosophila)	7
Details	936	91	hsa-miR-190a-3p	KBTBD7	kelch repeat and BTB domain containing 7									SRFBP1	ENST00000339397.4	serum response factor binding protein 1	102
Details	937	90	hsa-miR-190a-3p	MICU3	mitochondrial calcium uptake family member 3									CACNA1I	ENST00000402142.3	calcium channel, voltage-dependent, T type, alpha 1I subunit	5
Details	938	90	hsa-miR-190a-3p	IFNE	interferon epsilon									HIPK3	ENST00000303296.4	homeodomain interacting protein kinase 3	933
Details	939	90	hsa-miR-190a-3p	EIF4G1	eukaryotic translation initiation factor 4 gamma 1									CLINT1	ENST00000523094.1	clathrin interactor 1	581
Details	940	90	hsa-miR-190a-3p	ELL2	elongation factor for RNA polymerase II 2									RRM2B	ENST00000251810.3	ribonucleotide reductase M2 B (TP53 inducible)	205
Details	941	90	hsa-miR-190a-3p	PRPF4B	pre-mRNA processing factor 4B									IARS	ENST00000375629.3	isoleucyl-tRNA synthetase	65
Details	942	90	hsa-miR-190a-3p	UBE2E1	ubiquitin conjugating enzyme E2 E1									CPEB4	ENST00000265085.5	cytoplasmic polyadenylation element binding protein 4	472
Details	943	90	hsa-miR-190a-3p	LDLRAD3	low density lipoprotein receptor class A domain containing 3									KALRN	ENST00000393496.1	kalirin, RhoGEF kinase	83
Details	944	90	hsa-miR-190a-3p	ANO4	anoctamin 4									AL033381.1	ENST00000314040.1	Uncharacterized protein; cDNA FLJ34594 fis, clone KIDNE2009109	5
Details	945	90	hsa-miR-190a-3p	MOB1B	MOB kinase activator 1B									XKR9	ENST00000408926.3	XK, Kell blood group complex subunit-related family, member 9	5
Details	946	90	hsa-miR-190a-3p	MKX	mohawk homeobox									NEXN	ENST00000330010.8	nexilin (F actin binding protein)	165
Details	947	90	hsa-miR-190a-3p	CLRN1	clarin 1									ZNF730	ENST00000593635.1	zinc finger protein 730	8
Details	948	90	hsa-miR-190a-3p	UBE2U	ubiquitin conjugating enzyme E2 U									SPRY4	ENST00000344120.4	sprouty homolog 4 (Drosophila)	110
Details	949	90	hsa-miR-190a-3p	BBS7	Bardet-Biedl syndrome 7									BAMBI	ENST00000375533.3	BMP and activin membrane-bound inhibitor	515
Details	950	90	hsa-miR-190a-3p	GRK3	G protein-coupled receptor kinase 3									DHX15	ENST00000336812.4	DEAH (Asp-Glu-Ala-His) box helicase 15	1050
Details	951	90	hsa-miR-190a-3p	DIRAS2	DIRAS family GTPase 2									IL12A	ENST00000466512.1	interleukin 12A (natural killer cell stimulatory factor 1, cytotoxic lymphocyte maturation factor 1, p35)	31
Details	952	90	hsa-miR-190a-3p	PRKAR1A	protein kinase cAMP-dependent type I regulatory subunit alpha									CHCHD7	ENST00000518801.1	coiled-coil-helix-coiled-coil-helix domain containing 7	1416
Details	953	90	hsa-miR-190a-3p	MYH9	myosin heavy chain 9									RAN	ENST00000543796.1	RAN, member RAS oncogene family	1418
Details	954	90	hsa-miR-190a-3p	SLC17A6	solute carrier family 17 member 6									ADAMTS20	ENST00000389420.3	ADAM metallopeptidase with thrombospondin type 1 motif, 20	22
Details	955	90	hsa-miR-190a-3p	DNAL1	dynein axonemal light chain 1									CNOT6L	ENST00000504123.1	CCR4-NOT transcription complex, subunit 6-like	23
Details	956	90	hsa-miR-190a-3p	CNTN5	contactin 5									MALT1	ENST00000348428.3	mucosa associated lymphoid tissue lymphoma translocation gene 1	295
Details	957	90	hsa-miR-190a-3p	LONRF2	LON peptidase N-terminal domain and ring finger 2									STARD13	ENST00000336934.5	StAR-related lipid transfer (START) domain containing 13	314
Details	958	90	hsa-miR-190a-3p	APOOL	apolipoprotein O like									PUS7L	ENST00000416848.2	pseudouridylate synthase 7 homolog (S. cerevisiae)-like	67
Details	959	90	hsa-miR-190a-3p	SLC7A5	solute carrier family 7 member 5									DGKH	ENST00000261491.5	diacylglycerol kinase, eta	46
Details	960	90	hsa-miR-190a-3p	VWC2	von Willebrand factor C domain containing 2									ACYP2	ENST00000303536.4	acylphosphatase 2, muscle type	334
Details	961	90	hsa-miR-190a-3p	PDE4D	phosphodiesterase 4D									GPR34	ENST00000378142.4	G protein-coupled receptor 34	5
Details	962	90	hsa-miR-190a-3p	HTR1F	5-hydroxytryptamine receptor 1F									NLGN1	ENST00000457714.1	neuroligin 1	36
Details	963	90	hsa-miR-190a-3p	SNRPF	small nuclear ribonucleoprotein polypeptide F									NUDT17	ENST00000334513.5	nudix (nucleoside diphosphate linked moiety X)-type motif 17	131
Details	964	90	hsa-miR-190a-3p	DYNC1I2	dynein cytoplasmic 1 intermediate chain 2									MKX	ENST00000375790.5	mohawk homeobox	165
Details	965	90	hsa-miR-190a-3p	EIF1AX	eukaryotic translation initiation factor 1A X-linked									ST6GALNAC3	ENST00000328299.3	ST6 (alpha-N-acetyl-neuraminyl-2,3-beta-galactosyl-1,3)-N-acetylgalactosaminide alpha-2,6-sialyltransferase 3	41
Details	966	90	hsa-miR-190a-3p	STRIP1	striatin interacting protein 1									AC026202.1	ENST00000600805.1	Uncharacterized protein	10
Details	967	90	hsa-miR-190a-3p	ANK2	ankyrin 2									SYT14	ENST00000399639.2	synaptotagmin XIV	16
Details	968	90	hsa-miR-190a-3p	HERC3	HECT and RLD domain containing E3 ubiquitin protein ligase 3									QKI	ENST00000392127.2	QKI, KH domain containing, RNA binding	323
Details	969	90	hsa-miR-190a-3p	NRK	Nik related kinase									PMAIP1	ENST00000316660.6	phorbol-12-myristate-13-acetate-induced protein 1	12503
Details	970	90	hsa-miR-190a-3p	PAPSS2	3'-phosphoadenosine 5'-phosphosulfate synthase 2									OSTM1	ENST00000193322.3	osteopetrosis associated transmembrane protein 1	63
Details	971	90	hsa-miR-190a-3p	ASXL3	ASXL transcriptional regulator 3									FAM135B	ENST00000395297.1	family with sequence similarity 135, member B	5
Details	972	90	hsa-miR-190a-3p	TNRC6B	trinucleotide repeat containing 6B									C14orf144	ENST00000419115.1	chromosome 14 open reading frame 144	5
Details	973	90	hsa-miR-190a-3p	CYP26B1	cytochrome P450 family 26 subfamily B member 1									ESYT3	ENST00000389567.4	extended synaptotagmin-like protein 3	17
Details	974	90	hsa-miR-190a-3p	OPRK1	opioid receptor kappa 1									PDCD10	ENST00000392750.2	programmed cell death 10	638
Details	975	90	hsa-miR-190a-3p	ZC3H12C	zinc finger CCCH-type containing 12C									ADAM2	ENST00000347580.4	ADAM metallopeptidase domain 2	5
Details	976	90	hsa-miR-190a-3p	SLC16A7	solute carrier family 16 member 7									SERINC1	ENST00000339697.4	serine incorporator 1	2408
Details	977	89	hsa-miR-190a-3p	BMPR2	bone morphogenetic protein receptor type 2									RASAL2	ENST00000448150.3	RAS protein activator like 2	950
Details	978	89	hsa-miR-190a-3p	NDNF	neuron derived neurotrophic factor									SPATS2L	ENST00000358677.5	spermatogenesis associated, serine-rich 2-like	3387
Details	979	89	hsa-miR-190a-3p	TRIOBP	TRIO and F-actin binding protein									STOX1	ENST00000399165.4	storkhead box 1	502
Details	980	89	hsa-miR-190a-3p	SLC25A36	solute carrier family 25 member 36									GLYATL3	ENST00000371197.4	glycine-N-acyltransferase-like 3	5
Details	981	89	hsa-miR-190a-3p	CLEC12A	C-type lectin domain family 12 member A									GPC6	ENST00000377047.4	glypican 6	410
Details	982	89	hsa-miR-190a-3p	ABHD10	abhydrolase domain containing 10									CYP2B6	ENST00000324071.4	cytochrome P450, family 2, subfamily B, polypeptide 6	5
Details	983	89	hsa-miR-190a-3p	TMPO	thymopoietin									TMEM178B	ENST00000565468.1	transmembrane protein 178B	129
Details	984	89	hsa-miR-190a-3p	ACTR10	actin related protein 10 homolog									SQLE	ENST00000265896.5	squalene epoxidase	957
Details	985	89	hsa-miR-190a-3p	PPTC7	PTC7 protein phosphatase homolog									TRIM23	ENST00000231524.9	tripartite motif containing 23	247
Details	986	89	hsa-miR-190a-3p	ZC2HC1A	zinc finger C2HC-type containing 1A									DEPDC1B	ENST00000265036.5	DEP domain containing 1B	449
Details	987	89	hsa-miR-190a-3p	CCL15	C-C motif chemokine ligand 15									SLC39A8	ENST00000394833.2	solute carrier family 39 (zinc transporter), member 8	228
Details	988	89	hsa-miR-190a-3p	B3GALT2	beta-1,3-galactosyltransferase 2									CEP85L	ENST00000368491.3	centrosomal protein 85kDa-like	14
Details	989	89	hsa-miR-190a-3p	AFF4	AF4/FMR2 family member 4									RUSC1	ENST00000368352.5	RUN and SH3 domain containing 1	909
Details	990	89	hsa-miR-190a-3p	FEZF2	FEZ family zinc finger 2									SASS6	ENST00000287482.5	spindle assembly 6 homolog (C. elegans)	796
Details	991	89	hsa-miR-190a-3p	ARID5B	AT-rich interaction domain 5B									TAS2R14	ENST00000537503.1	taste receptor, type 2, member 14	22
Details	992	89	hsa-miR-190a-3p	ARHGEF1	Rho guanine nucleotide exchange factor 1									CYTL1	ENST00000307746.4	cytokine-like 1	15
Details	993	89	hsa-miR-190a-3p	DSC3	desmocollin 3									BCDIN3D	ENST00000333924.4	BCDIN3 domain containing	19
Details	994	89	hsa-miR-190a-3p	ENPP3	ectonucleotide pyrophosphatase/phosphodiesterase 3									LPPR4	ENST00000370185.3	Lipid phosphate phosphatase-related protein type 4	5
Details	995	89	hsa-miR-190a-3p	SFRP2	secreted frizzled related protein 2									SP9	ENST00000394967.2	Sp9 transcription factor	79
Details	996	89	hsa-miR-190a-3p	SYF2	SYF2 pre-mRNA splicing factor									PRKAR2B	ENST00000265717.4	protein kinase, cAMP-dependent, regulatory, type II, beta	148
Details	997	89	hsa-miR-190a-3p	ADGRG6	adhesion G protein-coupled receptor G6									PDXDC1	ENST00000396410.4	pyridoxal-dependent decarboxylase domain containing 1	6417
Details	998	89	hsa-miR-190a-3p	ARPP19	cAMP regulated phosphoprotein 19									CHST2	ENST00000309575.3	carbohydrate (N-acetylglucosamine-6-O) sulfotransferase 2	154
Details	999	89	hsa-miR-190a-3p	MAPK3	mitogen-activated protein kinase 3									MID2	ENST00000262843.6	midline 2	194
Details	1000	89	hsa-miR-190a-3p	AEBP2	AE binding protein 2									SEMA3D	ENST00000284136.6	sema domain, immunoglobulin domain (Ig), short basic domain, secreted, (semaphorin) 3D	85
Details	1001	89	hsa-miR-190a-3p	B3GLCT	beta 3-glucosyltransferase									ZMYM6NB	ENST00000373337.3	ZMYM6 neighbor	984
Details	1002	89	hsa-miR-190a-3p	PPM1A	protein phosphatase, Mg2+/Mn2+ dependent 1A									DCUN1D1	ENST00000292782.4	DCN1, defective in cullin neddylation 1, domain containing 1	267
Details	1003	89	hsa-miR-190a-3p	FAF2	Fas associated factor family member 2									PURA	ENST00000331327.3	purine-rich element binding protein A	367
Details	1004	89	hsa-miR-190a-3p	PCSK5	proprotein convertase subtilisin/kexin type 5									MYOZ2	ENST00000307128.5	myozenin 2	5
Details	1005	89	hsa-miR-190a-3p	MNX1	motor neuron and pancreas homeobox 1									DTD2	ENST00000310850.4	D-tyrosyl-tRNA deacylase 2 (putative)	924
Details	1006	89	hsa-miR-190a-3p	TMED7	transmembrane p24 trafficking protein 7									PWWP2A	ENST00000456329.3	PWWP domain containing 2A	272
Details	1007	89	hsa-miR-190a-3p	ASPA	aspartoacylase									PPP2R5E	ENST00000337537.3	protein phosphatase 2, regulatory subunit B', epsilon isoform	23
Details	1008	89	hsa-miR-190a-3p	CFAP44	cilia and flagella associated protein 44									ONECUT1	ENST00000560699.2	one cut homeobox 1	10
Details	1009	89	hsa-miR-190a-3p	NRXN1	neurexin 1									SPDYA	ENST00000379579.4	speedy/RINGO cell cycle regulator family member A	5
Details	1010	89	hsa-miR-190a-3p	CYP1A2	cytochrome P450 family 1 subfamily A member 2									ZNF713	ENST00000429591.2	zinc finger protein 713	5
Details	1011	89	hsa-miR-190a-3p	ERG	ETS transcription factor ERG									YPEL3	ENST00000566134.1	yippee-like 3 (Drosophila)	330
Details	1012	89	hsa-miR-190a-3p	TMEM71	transmembrane protein 71									TAGAP	ENST00000367066.3	T-cell activation RhoGTPase activating protein	5
Details	1013	89	hsa-miR-190a-3p	C5orf24	chromosome 5 open reading frame 24									KBTBD4	ENST00000526005.1	kelch repeat and BTB (POZ) domain containing 4	7
Details	1014	89	hsa-miR-190a-3p	PYROXD1	pyridine nucleotide-disulphide oxidoreductase domain 1									SLC6A5	ENST00000525748.1	solute carrier family 6 (neurotransmitter transporter), member 5	5
Details	1015	89	hsa-miR-190a-3p	WDTC1	WD and tetratricopeptide repeats 1									ZNF251	ENST00000292562.7	zinc finger protein 251	38
Details	1016	89	hsa-miR-190a-3p	UBN2	ubinuclein 2									OLFML2B	ENST00000294794.3	olfactomedin-like 2B	5
Details	1017	89	hsa-miR-190a-3p	CYP20A1	cytochrome P450 family 20 subfamily A member 1									EHD1	ENST00000320631.3	EH-domain containing 1	335
Details	1018	89	hsa-miR-190a-3p	ZNF678	zinc finger protein 678									TNFRSF11B	ENST00000297350.4	tumor necrosis factor receptor superfamily, member 11b	1786
Details	1019	89	hsa-miR-190a-3p	CYSLTR1	cysteinyl leukotriene receptor 1									NCK1	ENST00000469404.1	NCK adaptor protein 1	415
Details	1020	89	hsa-miR-190a-3p	DAGLA	diacylglycerol lipase alpha									WNT5A	ENST00000474267.1	wingless-type MMTV integration site family, member 5A	2080
Details	1021	88	hsa-miR-190a-3p	F2RL1	F2R like trypsin receptor 1									CCDC126	ENST00000307471.3	coiled-coil domain containing 126	846
Details	1022	88	hsa-miR-190a-3p	SBDS	SBDS, ribosome maturation factor									GCLM	ENST00000370238.3	glutamate-cysteine ligase, modifier subunit	809
Details	1023	88	hsa-miR-190a-3p	MAML3	mastermind like transcriptional coactivator 3									ALDOB	ENST00000374855.4	aldolase B, fructose-bisphosphate	5
Details	1024	88	hsa-miR-190a-3p	NOVA1	NOVA alternative splicing regulator 1									RAB5C	ENST00000346213.4	RAB5C, member RAS oncogene family	96
Details	1025	88	hsa-miR-190a-3p	NUGGC	nuclear GTPase, germinal center associated									ZNF384	ENST00000319770.3	zinc finger protein 384	8
Details	1026	88	hsa-miR-190a-3p	CPED1	cadherin like and PC-esterase domain containing 1									FBXO47	ENST00000378079.2	F-box protein 47	5
Details	1027	88	hsa-miR-190a-3p	C1orf141	chromosome 1 open reading frame 141									ARSJ	ENST00000315366.7	arylsulfatase family, member J	386
Details	1028	88	hsa-miR-190a-3p	PCDH20	protocadherin 20									DNAJB14	ENST00000442697.2	DnaJ (Hsp40) homolog, subfamily B, member 14	10
Details	1029	88	hsa-miR-190a-3p	SORT1	sortilin 1									CHORDC1	ENST00000320585.6	cysteine and histidine-rich domain (CHORD) containing 1	891
Details	1030	88	hsa-miR-190a-3p	SFT2D1	SFT2 domain containing 1									HOXA13	ENST00000222753.4	homeobox A13	328
Details	1031	88	hsa-miR-190a-3p	SAMD4A	sterile alpha motif domain containing 4A									THOC3	ENST00000265097.4	THO complex 3	29
Details	1032	88	hsa-miR-190a-3p	ANKRD33	ankyrin repeat domain 33									DNAL1	ENST00000553645.2	dynein, axonemal, light chain 1	81
Details	1033	88	hsa-miR-190a-3p	GXYLT1	glucoside xylosyltransferase 1									YIPF4	ENST00000238831.4	Yip1 domain family, member 4	3482
Details	1034	88	hsa-miR-190a-3p	ZNF559-ZNF177	ZNF559-ZNF177 readthrough									TENM1	ENST00000371130.3	teneurin transmembrane protein 1	5
Details	1035	88	hsa-miR-190a-3p	CEP128	centrosomal protein 128									XRCC5	ENST00000392133.3	X-ray repair complementing defective repair in Chinese hamster cells 5 (double-strand-break rejoining)	14802
Details	1036	88	hsa-miR-190a-3p	KDELC2	KDEL motif containing 2									EPB42	ENST00000300215.3	erythrocyte membrane protein band 4.2	5
Details	1037	88	hsa-miR-190a-3p	FUT9	fucosyltransferase 9									NDNF	ENST00000379692.4	neuron-derived neurotrophic factor	51
Details	1038	88	hsa-miR-190a-3p	FYN	FYN proto-oncogene, Src family tyrosine kinase									TNRC18	ENST00000399537.4	trinucleotide repeat containing 18	5
Details	1039	88	hsa-miR-190a-3p	TAGLN2	transgelin 2									AR	ENST00000374690.3	androgen receptor	57
Details	1040	88	hsa-miR-190a-3p	ZIC4	Zic family member 4									PTPRJ	ENST00000418331.2	protein tyrosine phosphatase, receptor type, J	145
Details	1041	88	hsa-miR-190a-3p	DOK6	docking protein 6									IRF2	ENST00000393593.3	interferon regulatory factor 2	420
Details	1042	88	hsa-miR-190a-3p	HSPA13	heat shock protein family A (Hsp70) member 13									ASZ1	ENST00000284629.2	ankyrin repeat, SAM and basic leucine zipper domain containing 1	5
Details	1043	88	hsa-miR-190a-3p	FAM160B1	family with sequence similarity 160 member B1									XK	ENST00000378616.3	X-linked Kx blood group (McLeod syndrome)	39
Details	1044	88	hsa-miR-190a-3p	GVQW2	GVQW motif containing 2									FAM35A	ENST00000298786.4	family with sequence similarity 35, member A	5
Details	1045	88	hsa-miR-190a-3p	CALN1	calneuron 1									SEPT10	ENST00000397712.2	septin 10	50
Details	1046	88	hsa-miR-190a-3p	MS4A1	membrane spanning 4-domains A1									SGPP2	ENST00000321276.7	sphingosine-1-phosphate phosphatase 2	182
Details	1047	88	hsa-miR-190a-3p	LYSMD3	LysM domain containing 3									PLA2G4A	ENST00000367466.3	phospholipase A2, group IVA (cytosolic, calcium-dependent)	75
Details	1048	88	hsa-miR-190a-3p	UMPS	uridine monophosphate synthetase									COL11A1	ENST00000370096.3	collagen, type XI, alpha 1	160
Details	1049	88	hsa-miR-190a-3p	ZNF26	zinc finger protein 26									SNRNP48	ENST00000342415.5	small nuclear ribonucleoprotein 48kDa (U11/U12)	423
Details	1050	88	hsa-miR-190a-3p	DSG4	desmoglein 4									RPS29	ENST00000245458.6	ribosomal protein S29	156
Details	1051	88	hsa-miR-190a-3p	DCLRE1A	DNA cross-link repair 1A									MTRF1	ENST00000430347.2	mitochondrial translational release factor 1	37
Details	1052	88	hsa-miR-190a-3p	ANKRD13A	ankyrin repeat domain 13A									RAB6A	ENST00000310653.6	RAB6A, member RAS oncogene family	9
Details	1053	88	hsa-miR-190a-3p	CRISP1	cysteine rich secretory protein 1									GPCPD1	ENST00000379019.4	glycerophosphocholine phosphodiesterase GDE1 homolog (S. cerevisiae)	155
Details	1054	88	hsa-miR-190a-3p	SEC23IP	SEC23 interacting protein									HSPD1	ENST00000388968.3	heat shock 60kDa protein 1 (chaperonin)	42
Details	1055	88	hsa-miR-190a-3p	GPR155	G protein-coupled receptor 155									SLC7A5	ENST00000565644.1	solute carrier family 7 (amino acid transporter light chain, L system), member 5	155
Details	1056	88	hsa-miR-190a-3p	B4GALT6	beta-1,4-galactosyltransferase 6									FAM72C	ENST00000369175.3	family with sequence similarity 72, member C	9
Details	1057	88	hsa-miR-190a-3p	HSPD1	heat shock protein family D (Hsp60) member 1									FAM19A2	ENST00000416284.3	family with sequence similarity 19 (chemokine (C-C motif)-like), member A2	26
Details	1058	88	hsa-miR-190a-3p	ZNF160	zinc finger protein 160									PIBF1	ENST00000326291.6	progesterone immunomodulatory binding factor 1	102
Details	1059	88	hsa-miR-190a-3p	PCLO	piccolo presynaptic cytomatrix protein									STK4	ENST00000372801.1	serine/threonine kinase 4	276
Details	1060	88	hsa-miR-190a-3p	FZD3	frizzled class receptor 3									CREG2	ENST00000324768.5	cellular repressor of E1A-stimulated genes 2	38
Details	1061	87	hsa-miR-190a-3p	KIAA1217	KIAA1217									NCOA7	ENST00000392477.2	nuclear receptor coactivator 7	2967
Details	1062	87	hsa-miR-190a-3p	PDLIM5	PDZ and LIM domain 5									HSD17B4	ENST00000256216.6	hydroxysteroid (17-beta) dehydrogenase 4	204
Details	1063	87	hsa-miR-190a-3p	ACP7	acid phosphatase 7, tartrate resistant (putative)									TRAPPC6B	ENST00000330149.5	trafficking protein particle complex 6B	69
Details	1064	87	hsa-miR-190a-3p	SCN9A	sodium voltage-gated channel alpha subunit 9									TRMT61B	ENST00000306108.5	tRNA methyltransferase 61 homolog B (S. cerevisiae)	450
Details	1065	87	hsa-miR-190a-3p	TRA2B	transformer 2 beta homolog									NDFIP2	ENST00000218652.7	Nedd4 family interacting protein 2	1747
Details	1066	87	hsa-miR-190a-3p	CFAP69	cilia and flagella associated protein 69									PLEKHJ1	ENST00000587394.2	pleckstrin homology domain containing, family J member 1	106
Details	1067	87	hsa-miR-190a-3p	KIAA0355	KIAA0355									WARS	ENST00000392882.2	tryptophanyl-tRNA synthetase	1916
Details	1068	87	hsa-miR-190a-3p	N4BP2L1	NEDD4 binding protein 2 like 1									STXBP4	ENST00000376352.2	syntaxin binding protein 4	62
Details	1069	87	hsa-miR-190a-3p	ROBO2	roundabout guidance receptor 2									SPDYE3	ENST00000332397.6	speedy/RINGO cell cycle regulator family member E3	5
Details	1070	87	hsa-miR-190a-3p	PCGF3	polycomb group ring finger 3									CLEC6A	ENST00000382073.3	C-type lectin domain family 6, member A	5
Details	1071	87	hsa-miR-190a-3p	RNF144A	ring finger protein 144A									PARG	ENST00000402038.3	poly (ADP-ribose) glycohydrolase	445
Details	1072	87	hsa-miR-190a-3p	IFT27	intraflagellar transport 27									CALCRL	ENST00000392370.3	calcitonin receptor-like	18
Details	1073	87	hsa-miR-190a-3p	ITGB8	integrin subunit beta 8									MAN1A2	ENST00000356554.3	mannosidase, alpha, class 1A, member 2	603
Details	1074	87	hsa-miR-190a-3p	UBXN8	UBX domain protein 8									TMEM237	ENST00000409444.2	transmembrane protein 237	2209
Details	1075	87	hsa-miR-190a-3p	POGZ	pogo transposable element derived with ZNF domain									RNF138	ENST00000261593.3	ring finger protein 138, E3 ubiquitin protein ligase	376
Details	1076	87	hsa-miR-190a-3p	ZFYVE1	zinc finger FYVE-type containing 1									GABRG1	ENST00000295452.4	gamma-aminobutyric acid (GABA) A receptor, gamma 1	5
Details	1077	87	hsa-miR-190a-3p	TMEFF2	transmembrane protein with EGF like and two follistatin like domains 2									DDOST	ENST00000602624.2	dolichyl-diphosphooligosaccharide--protein glycosyltransferase subunit (non-catalytic)	2697
Details	1078	87	hsa-miR-190a-3p	TMF1	TATA element modulatory factor 1									MYCN	ENST00000281043.3	v-myc avian myelocytomatosis viral oncogene neuroblastoma derived homolog	73
Details	1079	87	hsa-miR-190a-3p	NECAP1	NECAP endocytosis associated 1									MTCH2	ENST00000302503.3	mitochondrial carrier 2	4079
Details	1080	87	hsa-miR-190a-3p	FMN1	formin 1									PTGER4	ENST00000302472.3	prostaglandin E receptor 4 (subtype EP4)	326
Details	1081	87	hsa-miR-190a-3p	LGALSL	galectin like									LBR	ENST00000272163.4	lamin B receptor	1217
Details	1082	87	hsa-miR-190a-3p	IGF1R	insulin like growth factor 1 receptor									SAMD8	ENST00000372687.4	sterile alpha motif domain containing 8	100
Details	1083	87	hsa-miR-190a-3p	UBE2G1	ubiquitin conjugating enzyme E2 G1									KIRREL	ENST00000368172.1	kin of IRRE like (Drosophila)	493
Details	1084	87	hsa-miR-190a-3p	SLC35G2	solute carrier family 35 member G2									PCBD2	ENST00000512783.1	pterin-4 alpha-carbinolamine dehydratase/dimerization cofactor of hepatocyte nuclear factor 1 alpha (TCF1) 2	95
Details	1085	87	hsa-miR-190a-3p	NTM	neurotrimin									C2orf73	ENST00000398634.2	chromosome 2 open reading frame 73	5
Details	1086	87	hsa-miR-190a-3p	LAMA4	laminin subunit alpha 4									LRRC10	ENST00000361484.3	leucine rich repeat containing 10	5
Details	1087	87	hsa-miR-190a-3p	FGG	fibrinogen gamma chain									CALU	ENST00000535011.2	calumenin	3079
Details	1088	87	hsa-miR-190a-3p	DOCK4	dedicator of cytokinesis 4									SLC35A5	ENST00000492406.1	solute carrier family 35, member A5	168
Details	1089	87	hsa-miR-190a-3p	EPS8	epidermal growth factor receptor pathway substrate 8									ZC3H7A	ENST00000396516.2	zinc finger CCCH-type containing 7A	1071
Details	1090	87	hsa-miR-190a-3p	APAF1	apoptotic peptidase activating factor 1									UBN2	ENST00000473989.3	ubinuclein 2	238
Details	1091	87	hsa-miR-190a-3p	YIPF4	Yip1 domain family member 4									BNIP2	ENST00000267859.3	BCL2/adenovirus E1B 19kDa interacting protein 2	1255
Details	1092	87	hsa-miR-190a-3p	PRRC2A	proline rich coiled-coil 2A									CLEC2D	ENST00000261340.7	C-type lectin domain family 2, member D	11
Details	1093	87	hsa-miR-190a-3p	NEFL	neurofilament light									UBTD2	ENST00000393792.2	ubiquitin domain containing 2	297
Details	1094	87	hsa-miR-190a-3p	SLCO4C1	solute carrier organic anion transporter family member 4C1									RCC2	ENST00000375436.4	regulator of chromosome condensation 2	180
Details	1095	87	hsa-miR-190a-3p	SNTB2	syntrophin beta 2									MICU3	ENST00000318063.5	mitochondrial calcium uptake family, member 3	9
Details	1096	87	hsa-miR-190a-3p	SNX18	sorting nexin 18									PDGFRL	ENST00000251630.6	platelet-derived growth factor receptor-like	48
Details	1097	87	hsa-miR-190a-3p	DPP10	dipeptidyl peptidase like 10									LAPTM5	ENST00000294507.3	lysosomal protein transmembrane 5	5
Details	1098	87	hsa-miR-190a-3p	DLL1	delta like canonical Notch ligand 1									MED31	ENST00000225728.3	mediator complex subunit 31	1743
Details	1099	87	hsa-miR-190a-3p	LCORL	ligand dependent nuclear receptor corepressor like									GPA33	ENST00000367868.3	glycoprotein A33 (transmembrane)	5
Details	1100	87	hsa-miR-190a-3p	HECTD2	HECT domain E3 ubiquitin protein ligase 2									SYNGR1	ENST00000328933.5	synaptogyrin 1	101
Details	1101	87	hsa-miR-190a-3p	EXOSC9	exosome component 9									IFNK	ENST00000276943.2	interferon, kappa	5
Details	1102	87	hsa-miR-190a-3p	ZDHHC20	zinc finger DHHC-type containing 20									MNAT1	ENST00000261245.4	MNAT CDK-activating kinase assembly factor 1	191
Details	1103	87	hsa-miR-190a-3p	GABRA4	gamma-aminobutyric acid type A receptor alpha4 subunit									CADM2	ENST00000383699.3	cell adhesion molecule 2	5
Details	1104	87	hsa-miR-190a-3p	SATB2	SATB homeobox 2									GRK4	ENST00000503518.2	G protein-coupled receptor kinase 4	50
Details	1105	87	hsa-miR-190a-3p	MAP3K8	mitogen-activated protein kinase kinase kinase 8									P2RY1	ENST00000305097.3	purinergic receptor P2Y, G-protein coupled, 1	58
Details	1106	87	hsa-miR-190a-3p	URB2	URB2 ribosome biogenesis homolog									CEP135	ENST00000257287.4	centrosomal protein 135kDa	19
Details	1107	87	hsa-miR-190a-3p	ZNF236	zinc finger protein 236									CDON	ENST00000392693.3	cell adhesion associated, oncogene regulated	173
Details	1108	86	hsa-miR-190a-3p	ZNF366	zinc finger protein 366									PRKAA1	ENST00000397128.2	protein kinase, AMP-activated, alpha 1 catalytic subunit	1415
Details	1109	86	hsa-miR-190a-3p	IL7	interleukin 7									KIAA1468	ENST00000398130.2	KIAA1468	756
Details	1110	86	hsa-miR-190a-3p	MAF	MAF bZIP transcription factor									GRIA2	ENST00000296526.7	glutamate receptor, ionotropic, AMPA 2	5
Details	1111	86	hsa-miR-190a-3p	RFX8	RFX family member 8, lacking RFX DNA binding domain									TMEM257	ENST00000408967.2	transmembrane protein 257	5
Details	1112	86	hsa-miR-190a-3p	FGF5	fibroblast growth factor 5									TRAPPC3L	ENST00000356128.4	trafficking protein particle complex 3-like	5
Details	1113	86	hsa-miR-190a-3p	KIF18B	kinesin family member 18B									RP11-47I22.3	ENST00000556569.1	Uncharacterized protein	93
Details	1114	86	hsa-miR-190a-3p	UFM1	ubiquitin fold modifier 1									BPNT1	ENST00000322067.7	3'(2'), 5'-bisphosphate nucleotidase 1	201
Details	1115	86	hsa-miR-190a-3p	USP44	ubiquitin specific peptidase 44									ARL6	ENST00000463745.1	ADP-ribosylation factor-like 6	275
Details	1116	86	hsa-miR-190a-3p	CAMK4	calcium/calmodulin dependent protein kinase IV									KCNH5	ENST00000322893.7	potassium voltage-gated channel, subfamily H (eag-related), member 5	157
Details	1117	86	hsa-miR-190a-3p	SLC7A14	solute carrier family 7 member 14									ATXN3	ENST00000545170.1	ataxin 3	115
Details	1118	86	hsa-miR-190a-3p	PLEKHA5	pleckstrin homology domain containing A5									RAD52	ENST00000358495.3	RAD52 homolog (S. cerevisiae)	86
Details	1119	86	hsa-miR-190a-3p	ICK	intestinal cell kinase									JDP2	ENST00000435893.2	Jun dimerization protein 2	110
Details	1120	86	hsa-miR-190a-3p	MSANTD2	Myb/SANT DNA binding domain containing 2									TNFSF11	ENST00000405262.2	tumor necrosis factor (ligand) superfamily, member 11	12
Details	1121	86	hsa-miR-190a-3p	SMAD7	SMAD family member 7									WNT5B	ENST00000397196.2	wingless-type MMTV integration site family, member 5B	92
Details	1122	86	hsa-miR-190a-3p	SC5D	sterol-C5-desaturase									MIA2	ENST00000280082.3	melanoma inhibitory activity 2	5
Details	1123	86	hsa-miR-190a-3p	CNOT2	CCR4-NOT transcription complex subunit 2									UNK	ENST00000293218.3	unkempt homolog (Drosophila)	124
Details	1124	86	hsa-miR-190a-3p	LUZP1	leucine zipper protein 1									EDAR	ENST00000409271.1	ectodysplasin A receptor	7
Details	1125	86	hsa-miR-190a-3p	ZFP28	ZFP28 zinc finger protein									ZNF318	ENST00000361428.2	zinc finger protein 318	113
Details	1126	86	hsa-miR-190a-3p	ATXN1L	ataxin 1 like									ZNF326	ENST00000370447.3	zinc finger protein 326	162
Details	1127	86	hsa-miR-190a-3p	CAB39	calcium binding protein 39									NAF1	ENST00000274054.2	nuclear assembly factor 1 ribonucleoprotein	1208
Details	1128	86	hsa-miR-190a-3p	TRAT1	T cell receptor associated transmembrane adaptor 1									ATP6V1C1	ENST00000395862.3	ATPase, H+ transporting, lysosomal 42kDa, V1 subunit C1	951
Details	1129	86	hsa-miR-190a-3p	SNX27	sorting nexin family member 27									DIRAS2	ENST00000375765.3	DIRAS family, GTP-binding RAS-like 2	5
Details	1130	86	hsa-miR-190a-3p	TBL1XR1	transducin beta like 1 X-linked receptor 1									LXN	ENST00000264265.3	latexin	8
Details	1131	86	hsa-miR-190a-3p	MRPL17	mitochondrial ribosomal protein L17									METAP1	ENST00000296411.6	methionyl aminopeptidase 1	887
Details	1132	86	hsa-miR-190a-3p	BHLHE40	basic helix-loop-helix family member e40									KHSRP	ENST00000398148.3	KH-type splicing regulatory protein	4469
Details	1133	86	hsa-miR-190a-3p	DCP1B	decapping mRNA 1B									FANCF	ENST00000327470.3	Fanconi anemia, complementation group F	282
Details	1134	86	hsa-miR-190a-3p	TTC33	tetratricopeptide repeat domain 33									DRD1	ENST00000393752.2	dopamine receptor D1	7
Details	1135	86	hsa-miR-190a-3p	ZBTB38	zinc finger and BTB domain containing 38									THAP6	ENST00000311638.3	THAP domain containing 6	24
Details	1136	86	hsa-miR-190a-3p	SLC30A5	solute carrier family 30 member 5									HMGA2	ENST00000403681.2	high mobility group AT-hook 2	8021
Details	1137	86	hsa-miR-190a-3p	ITCH	itchy E3 ubiquitin protein ligase									TMEM50B	ENST00000542230.2	transmembrane protein 50B	528
Details	1138	86	hsa-miR-190a-3p	CREG2	cellular repressor of E1A stimulated genes 2									HCFC2	ENST00000229330.4	host cell factor C2	46
Details	1139	86	hsa-miR-190a-3p	NOL7	nucleolar protein 7									POMP	ENST00000380842.4	proteasome maturation protein	1065
Details	1140	86	hsa-miR-190a-3p	OGFRL1	opioid growth factor receptor like 1									PLSCR1	ENST00000342435.4	phospholipid scramblase 1	220
Details	1141	86	hsa-miR-190a-3p	SIX2	SIX homeobox 2									C5orf63	ENST00000535381.1	chromosome 5 open reading frame 63	42
Details	1142	86	hsa-miR-190a-3p	KREMEN1	kringle containing transmembrane protein 1									OR1L8	ENST00000304865.2	olfactory receptor, family 1, subfamily L, member 8	8
Details	1143	86	hsa-miR-190a-3p	RUSC1	RUN and SH3 domain containing 1									C9orf9	ENST00000372136.3	chromosome 9 open reading frame 9	44
Details	1144	86	hsa-miR-190a-3p	ZFX	zinc finger protein X-linked									SPDYE1	ENST00000258704.3	speedy/RINGO cell cycle regulator family member E1	5
Details	1145	86	hsa-miR-190a-3p	LMCD1	LIM and cysteine rich domains 1									CELF5	ENST00000541430.2	CUGBP, Elav-like family member 5	5
Details	1146	86	hsa-miR-190a-3p	BICDL1	BICD family like cargo adaptor 1									NPAS3	ENST00000346562.2	neuronal PAS domain protein 3	9
Details	1147	86	hsa-miR-190a-3p	PAPPA2	pappalysin 2									DLGAP2	ENST00000421627.2	discs, large (Drosophila) homolog-associated protein 2	5
Details	1148	86	hsa-miR-190a-3p	CELF6	CUGBP Elav-like family member 6									AHNAK	ENST00000378024.4	AHNAK nucleoprotein	682
Details	1149	86	hsa-miR-190a-3p	CDYL	chromodomain Y like									ZNF175	ENST00000262259.2	zinc finger protein 175	83
Details	1150	86	hsa-miR-190a-3p	RALGAPA1	Ral GTPase activating protein catalytic alpha subunit 1									ZMYM2	ENST00000382869.3	zinc finger, MYM-type 2	172
Details	1151	86	hsa-miR-190a-3p	PRR12	proline rich 12									PRPF18	ENST00000378572.3	pre-mRNA processing factor 18	551
Details	1152	86	hsa-miR-190a-3p	STAM	signal transducing adaptor molecule									FLT3LG	ENST00000596435.1	fms-related tyrosine kinase 3 ligand	25
Details	1153	86	hsa-miR-190a-3p	SLC1A4	solute carrier family 1 member 4									TBPL1	ENST00000237264.4	TBP-like 1	69
Details	1154	86	hsa-miR-190a-3p	ISM1	isthmin 1									HNRNPK	ENST00000376281.4	heterogeneous nuclear ribonucleoprotein K	124
Details	1155	86	hsa-miR-190a-3p	RHBDD1	rhomboid domain containing 1									SLCO4C1	ENST00000310954.6	solute carrier organic anion transporter family, member 4C1	13
Details	1156	85	hsa-miR-190a-3p	C20orf194	chromosome 20 open reading frame 194									ESF1	ENST00000202816.1	ESF1, nucleolar pre-rRNA processing protein, homolog (S. cerevisiae)	180
Details	1157	85	hsa-miR-190a-3p	RRP15	ribosomal RNA processing 15 homolog									ZDHHC20	ENST00000320220.9	zinc finger, DHHC-type containing 20	1486
Details	1158	85	hsa-miR-190a-3p	HEXIM1	HEXIM P-TEFb complex subunit 1									TIMM10	ENST00000257245.4	translocase of inner mitochondrial membrane 10 homolog (yeast)	2518
Details	1159	85	hsa-miR-190a-3p	FBXO33	F-box protein 33									PRRC2A	ENST00000376007.4	proline-rich coiled-coil 2A	5
Details	1160	85	hsa-miR-190a-3p	PRKAG2	protein kinase AMP-activated non-catalytic subunit gamma 2									IFNW1	ENST00000380229.2	interferon, omega 1	5
Details	1161	85	hsa-miR-190a-3p	GABRA1	gamma-aminobutyric acid type A receptor alpha1 subunit									SLC35D3	ENST00000331858.4	solute carrier family 35, member D3	13
Details	1162	85	hsa-miR-190a-3p	SHLD2	shieldin complex subunit 2									GALNTL6	ENST00000506823.1	UDP-N-acetyl-alpha-D-galactosamine:polypeptide N-acetylgalactosaminyltransferase-like 6	26
Details	1163	85	hsa-miR-190a-3p	EPM2AIP1	EPM2A interacting protein 1									CCDC64	ENST00000397558.2	coiled-coil domain containing 64	7
Details	1164	85	hsa-miR-190a-3p	STK39	serine/threonine kinase 39									AL162407.1	ENST00000451472.1	CDNA FLJ20147 fis, clone COL07954; HCG1781466; Uncharacterized protein	253
Details	1165	85	hsa-miR-190a-3p	DIS3	DIS3 homolog, exosome endoribonuclease and 3'-5' exoribonuclease									BDNF	ENST00000439476.2	brain-derived neurotrophic factor	2696
Details	1166	85	hsa-miR-190a-3p	ACTR3	ARP3 actin related protein 3 homolog									SMCHD1	ENST00000320876.6	structural maintenance of chromosomes flexible hinge domain containing 1	270
Details	1167	85	hsa-miR-190a-3p	PAK1IP1	PAK1 interacting protein 1									MCIDAS	ENST00000513312.1	multiciliate differentiation and DNA synthesis associated cell cycle protein	45
Details	1168	85	hsa-miR-190a-3p	CFTR	cystic fibrosis transmembrane conductance regulator									APAF1	ENST00000333991.1	apoptotic peptidase activating factor 1	23
Details	1169	85	hsa-miR-190a-3p	CCDC85A	coiled-coil domain containing 85A									PTAR1	ENST00000377200.5	protein prenyltransferase alpha subunit repeat containing 1	161
Details	1170	85	hsa-miR-190a-3p	PPP1CB	protein phosphatase 1 catalytic subunit beta									SLC7A2	ENST00000494857.1	solute carrier family 7 (cationic amino acid transporter, y+ system), member 2	1233
Details	1171	85	hsa-miR-190a-3p	MAT2B	methionine adenosyltransferase 2B									ATP6V1G1	ENST00000374050.3	ATPase, H+ transporting, lysosomal 13kDa, V1 subunit G1	8219
Details	1172	85	hsa-miR-190a-3p	HSD11B1	hydroxysteroid 11-beta dehydrogenase 1									GUCY1A2	ENST00000526355.2	guanylate cyclase 1, soluble, alpha 2	24
Details	1173	85	hsa-miR-190a-3p	LNPK	lunapark, ER junction formation factor									SLC25A40	ENST00000341119.5	solute carrier family 25, member 40	405
Details	1174	85	hsa-miR-190a-3p	UVRAG	UV radiation resistance associated									MBLAC2	ENST00000316610.6	metallo-beta-lactamase domain containing 2	498
Details	1175	85	hsa-miR-190a-3p	SFR1	SWI5 dependent homologous recombination repair protein 1									TSPAN8	ENST00000393330.2	tetraspanin 8	127
Details	1176	85	hsa-miR-190a-3p	MRPL19	mitochondrial ribosomal protein L19									KLF3	ENST00000261438.5	Kruppel-like factor 3 (basic)	515
Details	1177	85	hsa-miR-190a-3p	SGSM1	small G protein signaling modulator 1									HRASLS5	ENST00000539221.1	HRAS-like suppressor family, member 5	5
Details	1178	85	hsa-miR-190a-3p	DNAL4	dynein axonemal light chain 4									GORAB	ENST00000367763.3	golgin, RAB6-interacting	60
Details	1179	85	hsa-miR-190a-3p	PTAR1	protein prenyltransferase alpha subunit repeat containing 1									NT5C1B	ENST00000600945.1	5'-nucleotidase, cytosolic IB	567
Details	1180	85	hsa-miR-190a-3p	CHRNA5	cholinergic receptor nicotinic alpha 5 subunit									ARMC10	ENST00000323716.3	armadillo repeat containing 10	147
Details	1181	85	hsa-miR-190a-3p	ANKRD44	ankyrin repeat domain 44									SLC36A4	ENST00000326402.4	solute carrier family 36 (proton/amino acid symporter), member 4	252
Details	1182	85	hsa-miR-190a-3p	EGLN3	egl-9 family hypoxia inducible factor 3									SATB2	ENST00000417098.1	SATB homeobox 2	820
Details	1183	85	hsa-miR-190a-3p	SAP30L	SAP30 like									GPR22	ENST00000304402.4	G protein-coupled receptor 22	5
Details	1184	85	hsa-miR-190a-3p	DENND1B	DENN domain containing 1B									IPO11	ENST00000409534.1	importin 11	202
Details	1185	85	hsa-miR-190a-3p	IGSF9B	immunoglobulin superfamily member 9B									NOVA1	ENST00000465357.2	neuro-oncological ventral antigen 1	5
Details	1186	85	hsa-miR-190a-3p	DYNC2H1	dynein cytoplasmic 2 heavy chain 1									TAS2R5	ENST00000247883.4	taste receptor, type 2, member 5	16
Details	1187	85	hsa-miR-190a-3p	RORB	RAR related orphan receptor B									NT5C1B-RDH14	ENST00000532967.1	NT5C1B-RDH14 readthrough	572
Details	1188	85	hsa-miR-190a-3p	VEZF1	vascular endothelial zinc finger 1									SMC2	ENST00000374793.3	structural maintenance of chromosomes 2	212
Details	1189	85	hsa-miR-190a-3p	ZNF714	zinc finger protein 714									LRRC2	ENST00000395905.3	leucine rich repeat containing 2	5
Details	1190	84	hsa-miR-190a-3p	PDP2	pyruvate dehyrogenase phosphatase catalytic subunit 2									PABPC1L2B	ENST00000373521.2	poly(A) binding protein, cytoplasmic 1-like 2B	5
Details	1191	84	hsa-miR-190a-3p	EHD1	EH domain containing 1									ARGLU1	ENST00000400198.3	arginine and glutamate rich 1	9450
Details	1192	84	hsa-miR-190a-3p	AQR	aquarius intron-binding spliceosomal factor									IMPACT	ENST00000284202.4	impact RWD domain protein	250
Details	1193	84	hsa-miR-190a-3p	SERF1B	small EDRK-rich factor 1B									EN2	ENST00000297375.4	engrailed homeobox 2	86
Details	1194	84	hsa-miR-190a-3p	CCDC89	coiled-coil domain containing 89									ENPP5	ENST00000371383.2	ectonucleotide pyrophosphatase/phosphodiesterase 5 (putative)	15
Details	1195	84	hsa-miR-190a-3p	BICC1	BicC family RNA binding protein 1									ERVMER34-1	ENST00000443173.1	endogenous retrovirus group MER34, member 1	28
Details	1196	84	hsa-miR-190a-3p	TMEM50B	transmembrane protein 50B									FAM210A	ENST00000322247.3	family with sequence similarity 210, member A	222
Details	1197	84	hsa-miR-190a-3p	ERO1A	endoplasmic reticulum oxidoreductase 1 alpha									GDF10	ENST00000224605.2	growth differentiation factor 10	20
Details	1198	84	hsa-miR-190a-3p	OR2C3	olfactory receptor family 2 subfamily C member 3									CASP8	ENST00000392259.2	caspase 8, apoptosis-related cysteine peptidase	64
Details	1199	84	hsa-miR-190a-3p	ZNF660	zinc finger protein 660									ARHGEF33	ENST00000409978.1	Rho guanine nucleotide exchange factor (GEF) 33	9
Details	1200	84	hsa-miR-190a-3p	DCAF4L1	DDB1 and CUL4 associated factor 4 like 1									FAN1	ENST00000561594.1	FANCD2/FANCI-associated nuclease 1	56
Details	1201	84	hsa-miR-190a-3p	USP12	ubiquitin specific peptidase 12									FITM2	ENST00000396825.3	fat storage-inducing transmembrane protein 2	215
Details	1202	84	hsa-miR-190a-3p	SPIRE2	spire type actin nucleation factor 2									BLOC1S6	ENST00000220531.3	biogenesis of lysosomal organelles complex-1, subunit 6, pallidin	1754
Details	1203	84	hsa-miR-190a-3p	FBXO22	F-box protein 22									KIF18A	ENST00000263181.6	kinesin family member 18A	152
Details	1204	84	hsa-miR-190a-3p	HPCAL1	hippocalcin like 1									FSBP	ENST00000481490.2	fibrinogen silencer binding protein	36
Details	1205	84	hsa-miR-190a-3p	ENPP5	ectonucleotide pyrophosphatase/phosphodiesterase 5 (putative)									CCNE2	ENST00000520509.1	cyclin E2	76
Details	1206	84	hsa-miR-190a-3p	FZD8	frizzled class receptor 8									NAMPT	ENST00000222553.3	nicotinamide phosphoribosyltransferase	375
Details	1207	84	hsa-miR-190a-3p	LRRN1	leucine rich repeat neuronal 1									MYB	ENST00000367814.4	v-myb avian myeloblastosis viral oncogene homolog	39
Details	1208	84	hsa-miR-190a-3p	KRR1	KRR1, small subunit processome component homolog									NKAPL	ENST00000343684.3	NFKB activating protein-like	5
Details	1209	84	hsa-miR-190a-3p	STRN3	striatin 3									EXOC4	ENST00000253861.4	exocyst complex component 4	325
Details	1210	84	hsa-miR-190a-3p	TRPC1	transient receptor potential cation channel subfamily C member 1									MTRNR2L13	ENST00000604093.1	MT-RNR2-like 13 (pseudogene)	5
Details	1211	84	hsa-miR-190a-3p	TRAPPC6B	trafficking protein particle complex 6B									SLC26A3	ENST00000422236.2	solute carrier family 26 (anion exchanger), member 3	10
Details	1212	84	hsa-miR-190a-3p	MASP1	mannan binding lectin serine peptidase 1									NAA40	ENST00000377793.4	N(alpha)-acetyltransferase 40, NatD catalytic subunit	217
Details	1213	84	hsa-miR-190a-3p	GUCY1A2	guanylate cyclase 1 soluble subunit alpha 2									AF165138.7	ENST00000400562.1	Protein LOC388813	5
Details	1214	84	hsa-miR-190a-3p	SERF1A	small EDRK-rich factor 1A									SIRT1	ENST00000212015.6	sirtuin 1	220
Details	1215	84	hsa-miR-190a-3p	KDM5C	lysine demethylase 5C									LIN7A	ENST00000552864.1	lin-7 homolog A (C. elegans)	86
Details	1216	84	hsa-miR-190a-3p	HBS1L	HBS1 like translational GTPase									UCHL1	ENST00000284440.4	ubiquitin carboxyl-terminal esterase L1 (ubiquitin thiolesterase)	21879
Details	1217	84	hsa-miR-190a-3p	USP13	ubiquitin specific peptidase 13									MIS18BP1	ENST00000310806.4	MIS18 binding protein 1	74
Details	1218	84	hsa-miR-190a-3p	STN1	STN1, CST complex subunit									C3orf80	ENST00000326474.3	chromosome 3 open reading frame 80	296
Details	1219	84	hsa-miR-190a-3p	OSBPL6	oxysterol binding protein like 6									IFNAR1	ENST00000270139.3	interferon (alpha, beta and omega) receptor 1	372
Details	1220	84	hsa-miR-190a-3p	KIAA2026	KIAA2026									KBTBD2	ENST00000304056.4	kelch repeat and BTB (POZ) domain containing 2	2559
Details	1221	84	hsa-miR-190a-3p	ZNF148	zinc finger protein 148									NAA25	ENST00000261745.4	N(alpha)-acetyltransferase 25, NatB auxiliary subunit	919
Details	1222	84	hsa-miR-190a-3p	OSMR	oncostatin M receptor									MRPS7	ENST00000245539.6	mitochondrial ribosomal protein S7	6109
Details	1223	84	hsa-miR-190a-3p	GLYATL3	glycine-N-acyltransferase like 3									MEST	ENST00000437945.1	mesoderm specific transcript	31
Details	1224	84	hsa-miR-190a-3p	POLR2B	RNA polymerase II subunit B									KDELC2	ENST00000323468.5	KDEL (Lys-Asp-Glu-Leu) containing 2	667
Details	1225	83	hsa-miR-190a-3p	NAA50	N(alpha)-acetyltransferase 50, NatE catalytic subunit									UGT1A5	ENST00000373414.3	UDP glucuronosyltransferase 1 family, polypeptide A5	5
Details	1226	83	hsa-miR-190a-3p	ALG10	ALG10, alpha-1,2-glucosyltransferase									ILDR1	ENST00000273691.3	immunoglobulin-like domain containing receptor 1	5
Details	1227	83	hsa-miR-190a-3p	TBC1D15	TBC1 domain family member 15									CHRM2	ENST00000445907.2	cholinergic receptor, muscarinic 2	5
Details	1228	83	hsa-miR-190a-3p	TMEM56	transmembrane protein 56									UGT1A7	ENST00000373426.3	UDP glucuronosyltransferase 1 family, polypeptide A7	5
Details	1229	83	hsa-miR-190a-3p	KIF13A	kinesin family member 13A									PRDM13	ENST00000369215.4	PR domain containing 13	17
Details	1230	83	hsa-miR-190a-3p	ARHGAP39	Rho GTPase activating protein 39									UGT1A3	ENST00000482026.1	UDP glucuronosyltransferase 1 family, polypeptide A3	5
Details	1231	83	hsa-miR-190a-3p	PUM3	pumilio RNA binding family member 3									MPPED2	ENST00000358117.5	metallophosphoesterase domain containing 2	42
Details	1232	83	hsa-miR-190a-3p	ZNF561	zinc finger protein 561									UGT1A4	ENST00000373409.3	UDP glucuronosyltransferase 1 family, polypeptide A4	5
Details	1233	83	hsa-miR-190a-3p	RPS3A	ribosomal protein S3A									PLK2	ENST00000274289.3	polo-like kinase 2	689
Details	1234	83	hsa-miR-190a-3p	SPART	spartin									GDF9	ENST00000378673.2	growth differentiation factor 9	5
Details	1235	83	hsa-miR-190a-3p	MDK	midkine									OR52A1	ENST00000380367.1	olfactory receptor, family 52, subfamily A, member 1	5
Details	1236	83	hsa-miR-190a-3p	SENP6	SUMO specific peptidase 6									PLEKHG7	ENST00000344636.3	pleckstrin homology domain containing, family G (with RhoGef domain) member 7	5
Details	1237	83	hsa-miR-190a-3p	CMAS	cytidine monophosphate N-acetylneuraminic acid synthetase									UGT1A8	ENST00000305208.5	UDP glucuronosyltransferase 1 family, polypeptide A8	5
Details	1238	83	hsa-miR-190a-3p	TYW3	tRNA-yW synthesizing protein 3 homolog									SLC2A1	ENST00000426263.3	solute carrier family 2 (facilitated glucose transporter), member 1	13928
Details	1239	83	hsa-miR-190a-3p	RBM41	RNA binding motif protein 41									ZDHHC21	ENST00000380916.4	zinc finger, DHHC-type containing 21	196
Details	1240	83	hsa-miR-190a-3p	TNFRSF11B	TNF receptor superfamily member 11b									CLHC1	ENST00000406437.2	clathrin heavy chain linker domain containing 1	21
Details	1241	83	hsa-miR-190a-3p	CRY1	cryptochrome circadian regulator 1									CPEB3	ENST00000412050.4	cytoplasmic polyadenylation element binding protein 3	48
Details	1242	83	hsa-miR-190a-3p	DACH1	dachshund family transcription factor 1									SAV1	ENST00000324679.4	salvador homolog 1 (Drosophila)	162
Details	1243	83	hsa-miR-190a-3p	DMBX1	diencephalon/mesencephalon homeobox 1									PIGK	ENST00000370812.3	phosphatidylinositol glycan anchor biosynthesis, class K	1203
Details	1244	83	hsa-miR-190a-3p	IGF2R	insulin like growth factor 2 receptor									SCARB1	ENST00000261693.6	scavenger receptor class B, member 1	186
Details	1245	83	hsa-miR-190a-3p	BBX	BBX, HMG-box containing									EPB41L1	ENST00000441639.1	erythrocyte membrane protein band 4.1-like 1	369
Details	1246	83	hsa-miR-190a-3p	BNIP3L	BCL2 interacting protein 3 like									FBXW7	ENST00000281708.4	F-box and WD repeat domain containing 7, E3 ubiquitin protein ligase	12
Details	1247	83	hsa-miR-190a-3p	IGIP	IgA inducing protein									FAM131B	ENST00000443739.2	family with sequence similarity 131, member B	5
Details	1248	83	hsa-miR-190a-3p	MTDH	metadherin									RACGAP1	ENST00000427314.2	Rac GTPase activating protein 1	19
Details	1249	83	hsa-miR-190a-3p	CSNK2A1	casein kinase 2 alpha 1									MYCT1	ENST00000367245.5	myc target 1	5
Details	1250	83	hsa-miR-190a-3p	SREK1IP1	SREK1 interacting protein 1									NMNAT3	ENST00000511444.1	nicotinamide nucleotide adenylyltransferase 3	12
Details	1251	83	hsa-miR-190a-3p	RAB5C	RAB5C, member RAS oncogene family									FRK	ENST00000606080.1	fyn-related kinase	37
Details	1252	83	hsa-miR-190a-3p	CPEB2	cytoplasmic polyadenylation element binding protein 2									PSMA1	ENST00000396394.2	proteasome (prosome, macropain) subunit, alpha type, 1	124
Details	1253	83	hsa-miR-190a-3p	PRLR	prolactin receptor									ELK3	ENST00000228741.3	ELK3, ETS-domain protein (SRF accessory protein 2)	2719
Details	1254	83	hsa-miR-190a-3p	PLSCR1	phospholipid scramblase 1									TMEFF2	ENST00000392314.1	transmembrane protein with EGF-like and two follistatin-like domains 2	179
Details	1255	83	hsa-miR-190a-3p	HSPA9	heat shock protein family A (Hsp70) member 9									PTEN	ENST00000371953.3	phosphatase and tensin homolog	118
Details	1256	83	hsa-miR-190a-3p	RFXAP	regulatory factor X associated protein									RSF1	ENST00000308488.6	remodeling and spacing factor 1	216
Details	1257	83	hsa-miR-190a-3p	CADM4	cell adhesion molecule 4									PDZRN4	ENST00000298919.7	PDZ domain containing ring finger 4	5
Details	1258	83	hsa-miR-190a-3p	PLSCR4	phospholipid scramblase 4									MAB21L1	ENST00000379919.4	mab-21-like 1 (C. elegans)	25
Details	1259	83	hsa-miR-190a-3p	TFPI2	tissue factor pathway inhibitor 2									FCRL6	ENST00000321935.6	Fc receptor-like 6	5
Details	1260	83	hsa-miR-190a-3p	PLS1	plastin 1									TMEM75	ENST00000539634.1	transmembrane protein 75	5
Details	1261	83	hsa-miR-190a-3p	ANAPC10	anaphase promoting complex subunit 10									KLRG1	ENST00000356986.3	killer cell lectin-like receptor subfamily G, member 1	15
Details	1262	83	hsa-miR-190a-3p	NME9	NME/NM23 family member 9									ZBTB44	ENST00000525842.1	zinc finger and BTB domain containing 44	236
Details	1263	83	hsa-miR-190a-3p	MCEE	methylmalonyl-CoA epimerase									KLF10	ENST00000285407.6	Kruppel-like factor 10	320
Details	1264	83	hsa-miR-190a-3p	TPK1	thiamin pyrophosphokinase 1									GJB6	ENST00000241124.6	gap junction protein, beta 6, 30kDa	5
Details	1265	82	hsa-miR-190a-3p	UTP3	UTP3, small subunit processome component									TECTB	ENST00000369422.3	tectorin beta	5
Details	1266	82	hsa-miR-190a-3p	FOXN3	forkhead box N3									SNX24	ENST00000513881.1	sorting nexin 24	352
Details	1267	82	hsa-miR-190a-3p	ZMAT3	zinc finger matrin-type 3									SEPHS1	ENST00000545675.1	selenophosphate synthetase 1	281
Details	1268	82	hsa-miR-190a-3p	GRAMD1C	GRAM domain containing 1C									C11orf48	ENST00000354588.3	chromosome 11 open reading frame 48	29
Details	1269	82	hsa-miR-190a-3p	TRIM5	tripartite motif containing 5									TMEM47	ENST00000275954.3	transmembrane protein 47	129
Details	1270	82	hsa-miR-190a-3p	GJB6	gap junction protein beta 6									RAI1	ENST00000353383.1	retinoic acid induced 1	277
Details	1271	82	hsa-miR-190a-3p	NUF2	NDC80 kinetochore complex component NUF2									ZNF681	ENST00000402377.3	zinc finger protein 681	21
Details	1272	82	hsa-miR-190a-3p	CRLF3	cytokine receptor like factor 3									METTL21A	ENST00000448823.2	methyltransferase like 21A	224
Details	1273	82	hsa-miR-190a-3p	AMPH	amphiphysin									KSR2	ENST00000425217.1	kinase suppressor of ras 2	22
Details	1274	82	hsa-miR-190a-3p	EML1	EMAP like 1									C4orf46	ENST00000508457.1	chromosome 4 open reading frame 46	128
Details	1275	82	hsa-miR-190a-3p	RAB43	RAB43, member RAS oncogene family									PRDM5	ENST00000515109.1	PR domain containing 5	22
Details	1276	82	hsa-miR-190a-3p	YIPF6	Yip1 domain family member 6									CTD-2368P22.1	ENST00000550135.1	HCG1811579; Uncharacterized protein	25
Details	1277	82	hsa-miR-190a-3p	NUP43	nucleoporin 43									NFIA	ENST00000403491.3	nuclear factor I/A	5
Details	1278	82	hsa-miR-190a-3p	CBWD5	COBW domain containing 5									AGL	ENST00000370161.2	amylo-alpha-1, 6-glucosidase, 4-alpha-glucanotransferase	48
Details	1279	82	hsa-miR-190a-3p	LIPG	lipase G, endothelial type									CTNNA3	ENST00000433211.2	catenin (cadherin-associated protein), alpha 3	5
Details	1280	82	hsa-miR-190a-3p	NUMBL	NUMB like, endocytic adaptor protein									UGT1A9	ENST00000354728.4	UDP glucuronosyltransferase 1 family, polypeptide A9	5
Details	1281	82	hsa-miR-190a-3p	NMBR	neuromedin B receptor									SLC38A4	ENST00000447411.1	solute carrier family 38, member 4	10
Details	1282	82	hsa-miR-190a-3p	CXCR4	C-X-C motif chemokine receptor 4									RARB	ENST00000437042.2	retinoic acid receptor, beta	48
Details	1283	82	hsa-miR-190a-3p	PIK3CA	phosphatidylinositol-4,5-bisphosphate 3-kinase catalytic subunit alpha									NDST1	ENST00000261797.6	N-deacetylase/N-sulfotransferase (heparan glucosaminyl) 1	13660
Details	1284	82	hsa-miR-190a-3p	PROX1	prospero homeobox 1									GPRASP1	ENST00000361600.5	G protein-coupled receptor associated sorting protein 1	25
Details	1285	82	hsa-miR-190a-3p	OPA1	OPA1, mitochondrial dynamin like GTPase									VPS13C	ENST00000249837.3	vacuolar protein sorting 13 homolog C (S. cerevisiae)	85
Details	1286	82	hsa-miR-190a-3p	ADAMTS5	ADAM metallopeptidase with thrombospondin type 1 motif 5									MRPS9	ENST00000258455.3	mitochondrial ribosomal protein S9	35
Details	1287	82	hsa-miR-190a-3p	ING3	inhibitor of growth family member 3									ZNF609	ENST00000326648.3	zinc finger protein 609	103
Details	1288	82	hsa-miR-190a-3p	ABCC1	ATP binding cassette subfamily C member 1									UGT1A6	ENST00000305139.6	UDP glucuronosyltransferase 1 family, polypeptide A6	5
Details	1289	82	hsa-miR-190a-3p	SNX2	sorting nexin 2									SLC17A6	ENST00000263160.3	solute carrier family 17 (vesicular glutamate transporter), member 6	5
Details	1290	82	hsa-miR-190a-3p	NBEA	neurobeachin									C2orf69	ENST00000319974.5	chromosome 2 open reading frame 69	82
Details	1291	82	hsa-miR-190a-3p	RAP1A	RAP1A, member of RAS oncogene family									CASZ1	ENST00000377022.3	castor zinc finger 1	5
Details	1292	82	hsa-miR-190a-3p	ZNF546	zinc finger protein 546									SCN3A	ENST00000360093.3	sodium channel, voltage-gated, type III, alpha subunit	5
Details	1293	82	hsa-miR-190a-3p	RUFY3	RUN and FYVE domain containing 3									PRRG1	ENST00000378628.4	proline rich Gla (G-carboxyglutamic acid) 1	1122
Details	1294	82	hsa-miR-190a-3p	UBIAD1	UbiA prenyltransferase domain containing 1									PVRL3	ENST00000319792.3	poliovirus receptor-related 3	361
Details	1295	82	hsa-miR-190a-3p	IDE	insulin degrading enzyme									MPHOSPH6	ENST00000258169.4	M-phase phosphoprotein 6	139
Details	1296	82	hsa-miR-190a-3p	BRD4	bromodomain containing 4									IKZF2	ENST00000457361.1	IKAROS family zinc finger 2 (Helios)	32
Details	1297	82	hsa-miR-190a-3p	CBWD3	COBW domain containing 3									OSBPL3	ENST00000313367.2	oxysterol binding protein-like 3	200
Details	1298	82	hsa-miR-190a-3p	TOB1	transducer of ERBB2, 1									CBX4	ENST00000269397.4	chromobox homolog 4	3211
Details	1299	82	hsa-miR-190a-3p	RSF1	remodeling and spacing factor 1									KCMF1	ENST00000409785.4	potassium channel modulatory factor 1	1285
Details	1300	82	hsa-miR-190a-3p	ZNF655	zinc finger protein 655									CUL2	ENST00000374746.1	cullin 2	27
Details	1301	82	hsa-miR-190a-3p	KLHL9	kelch like family member 9									PCGF3	ENST00000362003.5	polycomb group ring finger 3	503
Details	1302	82	hsa-miR-190a-3p	RGS5	regulator of G protein signaling 5									RPS6KB1	ENST00000225577.4	ribosomal protein S6 kinase, 70kDa, polypeptide 1	16
Details	1303	82	hsa-miR-190a-3p	RAD23A	RAD23 homolog A, nucleotide excision repair protein									PPIL1	ENST00000373699.5	peptidylprolyl isomerase (cyclophilin)-like 1	662
Details	1304	82	hsa-miR-190a-3p	DUSP8	dual specificity phosphatase 8									IRS1	ENST00000305123.5	insulin receptor substrate 1	804
Details	1305	82	hsa-miR-190a-3p	TRMT10A	tRNA methyltransferase 10A									WISP3	ENST00000361714.1	WNT1 inducible signaling pathway protein 3	5
Details	1306	82	hsa-miR-190a-3p	RABL3	RAB, member of RAS oncogene family like 3									RP11-650K20.3	ENST00000551650.1	Uncharacterized protein	5
Details	1307	82	hsa-miR-190a-3p	ERLIN1	ER lipid raft associated 1									NUF2	ENST00000367900.3	NUF2, NDC80 kinetochore complex component	63
Details	1308	82	hsa-miR-190a-3p	ARAF	A-Raf proto-oncogene, serine/threonine kinase									TSEN34	ENST00000302937.4	TSEN34 tRNA splicing endonuclease subunit	2691
Details	1309	82	hsa-miR-190a-3p	PRR23A	proline rich 23A									COBLL1	ENST00000375458.2	cordon-bleu WH2 repeat protein-like 1	70
Details	1310	82	hsa-miR-190a-3p	CDH11	cadherin 11									SIM1	ENST00000369208.3	single-minded homolog 1 (Drosophila)	104
Details	1311	82	hsa-miR-190a-3p	ZFPM2	zinc finger protein, FOG family member 2									MSI2	ENST00000284073.2	musashi RNA-binding protein 2	283
Details	1312	81	hsa-miR-190a-3p	ISCU	iron-sulfur cluster assembly enzyme									KLK7	ENST00000391807.1	kallikrein-related peptidase 7	5
Details	1313	81	hsa-miR-190a-3p	PGM3	phosphoglucomutase 3									PLA2G12A	ENST00000243501.5	phospholipase A2, group XIIA	214
Details	1314	81	hsa-miR-190a-3p	COL11A1	collagen type XI alpha 1 chain									WFDC5	ENST00000372789.4	WAP four-disulfide core domain 5	5
Details	1315	81	hsa-miR-190a-3p	TFAM	transcription factor A, mitochondrial									RPL34	ENST00000394668.2	ribosomal protein L34	624
Details	1316	81	hsa-miR-190a-3p	FAM227A	family with sequence similarity 227 member A									NFIC	ENST00000346156.5	nuclear factor I/C (CCAAT-binding transcription factor)	26
Details	1317	81	hsa-miR-190a-3p	C1QL3	complement C1q like 3									ARHGAP29	ENST00000260526.6	Rho GTPase activating protein 29	451
Details	1318	81	hsa-miR-190a-3p	FNDC3A	fibronectin type III domain containing 3A									CAMK4	ENST00000282356.4	calcium/calmodulin-dependent protein kinase IV	73
Details	1319	81	hsa-miR-190a-3p	DGKK	diacylglycerol kinase kappa									CREBL2	ENST00000228865.2	cAMP responsive element binding protein-like 2	218
Details	1320	81	hsa-miR-190a-3p	GRIN2A	glutamate ionotropic receptor NMDA type subunit 2A									LCORL	ENST00000326877.4	ligand dependent nuclear receptor corepressor-like	194
Details	1321	81	hsa-miR-190a-3p	ROR1	receptor tyrosine kinase like orphan receptor 1									NCALD	ENST00000395923.1	neurocalcin delta	49
Details	1322	81	hsa-miR-190a-3p	FER	FER tyrosine kinase									GTPBP3	ENST00000324894.8	GTP binding protein 3 (mitochondrial)	1451
Details	1323	81	hsa-miR-190a-3p	RICTOR	RPTOR independent companion of MTOR complex 2									KAT6A	ENST00000265713.2	K(lysine) acetyltransferase 6A	21
Details	1324	81	hsa-miR-190a-3p	MDM2	MDM2 proto-oncogene									DPY19L4	ENST00000414645.2	dpy-19-like 4 (C. elegans)	362
Details	1325	81	hsa-miR-190a-3p	NCS1	neuronal calcium sensor 1									ZFAND1	ENST00000521895.1	zinc finger, AN1-type domain 1	496
Details	1326	81	hsa-miR-190a-3p	ASH1L	ASH1 like histone lysine methyltransferase									CAAP1	ENST00000520187.1	caspase activity and apoptosis inhibitor 1	1527
Details	1327	81	hsa-miR-190a-3p	TOR1AIP2	torsin 1A interacting protein 2									ANKRD13C	ENST00000370944.4	ankyrin repeat domain 13C	369
Details	1328	81	hsa-miR-190a-3p	NPHP3	nephrocystin 3									ZNF708	ENST00000356929.3	zinc finger protein 708	16
Details	1329	81	hsa-miR-190a-3p	USP28	ubiquitin specific peptidase 28									NEUROD4	ENST00000242994.3	neuronal differentiation 4	5
Details	1330	81	hsa-miR-190a-3p	SNX16	sorting nexin 16									SLC12A1	ENST00000396577.3	solute carrier family 12 (sodium/potassium/chloride transporter), member 1	5
Details	1331	81	hsa-miR-190a-3p	TGFBR1	transforming growth factor beta receptor 1									TMPRSS12	ENST00000551456.1	transmembrane (C-terminal) protease, serine 12	5
Details	1332	81	hsa-miR-190a-3p	CYP19A1	cytochrome P450 family 19 subfamily A member 1									ARHGAP21	ENST00000396432.2	Rho GTPase activating protein 21	10
Details	1333	81	hsa-miR-190a-3p	P2RY1	purinergic receptor P2Y1									CYP4Z1	ENST00000334194.3	cytochrome P450, family 4, subfamily Z, polypeptide 1	5
Details	1334	81	hsa-miR-190a-3p	APOL6	apolipoprotein L6									PDE6C	ENST00000371447.3	phosphodiesterase 6C, cGMP-specific, cone, alpha prime	5
Details	1335	81	hsa-miR-190a-3p	RAB30	RAB30, member RAS oncogene family									WDHD1	ENST00000360586.3	WD repeat and HMG-box DNA binding protein 1	466
Details	1336	81	hsa-miR-190a-3p	DCAF5	DDB1 and CUL4 associated factor 5									GUCD1	ENST00000447813.2	guanylyl cyclase domain containing 1	2990
Details	1337	81	hsa-miR-190a-3p	PCDH10	protocadherin 10									SLMAP	ENST00000295951.3	sarcolemma associated protein	208
Details	1338	81	hsa-miR-190a-3p	SLMAP	sarcolemma associated protein									CEP97	ENST00000341893.3	centrosomal protein 97kDa	290
Details	1339	81	hsa-miR-190a-3p	PLN	phospholamban									TNPO1	ENST00000337273.5	transportin 1	2041
Details	1340	81	hsa-miR-190a-3p	CACNA1B	calcium voltage-gated channel subunit alpha1 B									ZMAT3	ENST00000311417.2	zinc finger, matrin-type 3	459
Details	1341	81	hsa-miR-190a-3p	SYNPO2	synaptopodin 2									SI	ENST00000264382.3	sucrase-isomaltase (alpha-glucosidase)	5
Details	1342	81	hsa-miR-190a-3p	FGF7	fibroblast growth factor 7									RP11-861L17.3	ENST00000579678.1	Uncharacterized protein	5
Details	1343	81	hsa-miR-190a-3p	OSTM1	osteoclastogenesis associated transmembrane protein 1									ASAH2B	ENST00000374007.1	N-acylsphingosine amidohydrolase (non-lysosomal ceramidase) 2B	5
Details	1344	81	hsa-miR-190a-3p	DBF4	DBF4 zinc finger									E2F8	ENST00000527884.1	E2F transcription factor 8	66
Details	1345	81	hsa-miR-190a-3p	GINS1	GINS complex subunit 1									ZIC4	ENST00000383075.3	Zic family member 4	5
Details	1346	80	hsa-miR-190a-3p	MEI4	meiotic double-stranded break formation protein 4									ZNF397	ENST00000330501.7	zinc finger protein 397	59
Details	1347	80	hsa-miR-190a-3p	RAB18	RAB18, member RAS oncogene family									CTXN3	ENST00000379445.3	cortexin 3	5
Details	1348	80	hsa-miR-190a-3p	SH3RF1	SH3 domain containing ring finger 1									SENP8	ENST00000544411.1	SUMO/sentrin specific peptidase family member 8	80
Details	1349	80	hsa-miR-190a-3p	OGN	osteoglycin									ABCC1	ENST00000399408.2	ATP-binding cassette, sub-family C (CFTR/MRP), member 1	441
Details	1350	80	hsa-miR-190a-3p	SNCAIP	synuclein alpha interacting protein									MDM2	ENST00000462284.1	MDM2 oncogene, E3 ubiquitin protein ligase	455
Details	1351	80	hsa-miR-190a-3p	EPHA4	EPH receptor A4									CARF	ENST00000402905.3	calcium responsive transcription factor	27
Details	1352	80	hsa-miR-190a-3p	MYO1E	myosin IE									SFT2D1	ENST00000361731.3	SFT2 domain containing 1	433
Details	1353	80	hsa-miR-190a-3p	KDSR	3-ketodihydrosphingosine reductase									EIF4G1	ENST00000342981.4	eukaryotic translation initiation factor 4 gamma, 1	1027
Details	1354	80	hsa-miR-190a-3p	CEP85L	centrosomal protein 85 like									PDCL3	ENST00000264254.6	phosducin-like 3	58
Details	1355	80	hsa-miR-190a-3p	TTLL7	tubulin tyrosine ligase like 7									EPHA5	ENST00000273854.3	EPH receptor A5	48
Details	1356	80	hsa-miR-190a-3p	CCDC15	coiled-coil domain containing 15									SEPT7	ENST00000435235.1	septin 7	97
Details	1357	80	hsa-miR-190a-3p	TRPC6	transient receptor potential cation channel subfamily C member 6									PRDM6	ENST00000407847.4	PR domain containing 6	69
Details	1358	80	hsa-miR-190a-3p	SREK1	splicing regulatory glutamic acid and lysine rich protein 1									LSMEM1	ENST00000312849.4	leucine-rich single-pass membrane protein 1	10
Details	1359	80	hsa-miR-190a-3p	RAB3GAP1	RAB3 GTPase activating protein catalytic subunit 1									OIT3	ENST00000334011.5	oncoprotein induced transcript 3	5
Details	1360	80	hsa-miR-190a-3p	CA8	carbonic anhydrase 8									HIST2H4B	ENST00000392932.4	histone cluster 2, H4b	5
Details	1361	80	hsa-miR-190a-3p	FAM110C	family with sequence similarity 110 member C									ANGPTL3	ENST00000371129.3	angiopoietin-like 3	59
Details	1362	80	hsa-miR-190a-3p	SLC12A3	solute carrier family 12 member 3									IQCK	ENST00000320394.6	IQ motif containing K	42
Details	1363	80	hsa-miR-190a-3p	C5orf38	chromosome 5 open reading frame 38									RAB13	ENST00000368575.3	RAB13, member RAS oncogene family	26
Details	1364	80	hsa-miR-190a-3p	KBTBD4	kelch repeat and BTB domain containing 4									BBX	ENST00000415149.2	bobby sox homolog (Drosophila)	141
Details	1365	80	hsa-miR-190a-3p	ZNF652	zinc finger protein 652									BRCC3	ENST00000369462.1	BRCA1/BRCA2-containing complex, subunit 3	14
Details	1366	80	hsa-miR-190a-3p	KLHL5	kelch like family member 5									BROX	ENST00000537020.1	BRO1 domain and CAAX motif containing	149
Details	1367	80	hsa-miR-190a-3p	MTR	5-methyltetrahydrofolate-homocysteine methyltransferase									RER1	ENST00000378512.1	RER1 retention in endoplasmic reticulum 1 homolog (S. cerevisiae)	2954
Details	1368	80	hsa-miR-190a-3p	KIF1C	kinesin family member 1C									ARHGAP5	ENST00000345122.3	Rho GTPase activating protein 5	757
Details	1369	80	hsa-miR-190a-3p	DNM1	dynamin 1									KCNK2	ENST00000444842.2	potassium channel, subfamily K, member 2	258
Details	1370	80	hsa-miR-190a-3p	SGIP1	SH3 domain GRB2 like endophilin interacting protein 1									ALX4	ENST00000329255.3	ALX homeobox 4	52
Details	1371	80	hsa-miR-190a-3p	EREG	epiregulin									UGGT2	ENST00000376747.3	UDP-glucose glycoprotein glucosyltransferase 2	423
Details	1372	80	hsa-miR-190a-3p	CDH6	cadherin 6									LDLRAD3	ENST00000315571.5	low density lipoprotein receptor class A domain containing 3	90
Details	1373	80	hsa-miR-190a-3p	LIN28B	lin-28 homolog B									ARHGAP6	ENST00000380736.1	Rho GTPase activating protein 6	12
Details	1374	80	hsa-miR-190a-3p	BCOR	BCL6 corepressor									CSGALNACT1	ENST00000454498.2	chondroitin sulfate N-acetylgalactosaminyltransferase 1	77
Details	1375	80	hsa-miR-190a-3p	LHFPL5	LHFPL tetraspan subfamily member 5									RFX8	ENST00000376826.2	RFX family member 8, lacking RFX DNA binding domain	21
Details	1376	80	hsa-miR-190a-3p	ATP6V1C1	ATPase H+ transporting V1 subunit C1									F2RL1	ENST00000296677.4	coagulation factor II (thrombin) receptor-like 1	184
Details	1377	80	hsa-miR-190a-3p	PPM1H	protein phosphatase, Mg2+/Mn2+ dependent 1H									DUSP8	ENST00000397374.3	dual specificity phosphatase 8	26
Details	1378	80	hsa-miR-190a-3p	GTF2B	general transcription factor IIB									BTBD7	ENST00000334746.5	BTB (POZ) domain containing 7	590
Details	1379	80	hsa-miR-190a-3p	WEE1	WEE1 G2 checkpoint kinase									RPGR	ENST00000338898.3	retinitis pigmentosa GTPase regulator	72
Details	1380	80	hsa-miR-190a-3p	RAVER2	ribonucleoprotein, PTB binding 2									TPH1	ENST00000250018.2	tryptophan hydroxylase 1	12
Details	1381	80	hsa-miR-190a-3p	MED28	mediator complex subunit 28									IDH1	ENST00000345146.2	isocitrate dehydrogenase 1 (NADP+), soluble	503
Details	1382	80	hsa-miR-190a-3p	PAXBP1	PAX3 and PAX7 binding protein 1									AIP	ENST00000279146.3	aryl hydrocarbon receptor interacting protein	2469
Details	1383	80	hsa-miR-190a-3p	MORC3	MORC family CW-type zinc finger 3									ZBTB10	ENST00000430430.1	zinc finger and BTB domain containing 10	113
Details	1384	80	hsa-miR-190a-3p	NET1	neuroepithelial cell transforming 1									XIAP	ENST00000371199.3	X-linked inhibitor of apoptosis	153
Details	1385	80	hsa-miR-190a-3p	TMEM170A	transmembrane protein 170A									CLMP	ENST00000448775.2	CXADR-like membrane protein	212
Details	1386	79	hsa-miR-190a-3p	NFKBIZ	NFKB inhibitor zeta									AC007390.5	ENST00000402297.1	HCG1988162; Uncharacterized protein	223
Details	1387	79	hsa-miR-190a-3p	CASP8	caspase 8									RSPRY1	ENST00000394420.4	ring finger and SPRY domain containing 1	735
Details	1388	79	hsa-miR-190a-3p	SLC1A2	solute carrier family 1 member 2									PIGM	ENST00000368090.2	phosphatidylinositol glycan anchor biosynthesis, class M	179
Details	1389	79	hsa-miR-190a-3p	NLGN4Y	neuroligin 4 Y-linked									TBC1D4	ENST00000377636.3	TBC1 domain family, member 4	96
Details	1390	79	hsa-miR-190a-3p	ZNF562	zinc finger protein 562									RIC8B	ENST00000392837.4	RIC8 guanine nucleotide exchange factor B	49
Details	1391	79	hsa-miR-190a-3p	HDAC1	histone deacetylase 1									ICK	ENST00000350082.5	intestinal cell (MAK-like) kinase	18
Details	1392	79	hsa-miR-190a-3p	NUP58	nucleoporin 58									FBXL2	ENST00000484457.1	F-box and leucine-rich repeat protein 2	12
Details	1393	79	hsa-miR-190a-3p	VPS37A	VPS37A, ESCRT-I subunit									ADH4	ENST00000508393.1	alcohol dehydrogenase 4 (class II), pi polypeptide	5
Details	1394	79	hsa-miR-190a-3p	HIVEP2	human immunodeficiency virus type I enhancer binding protein 2									PTN	ENST00000393083.2	pleiotrophin	11
Details	1395	79	hsa-miR-190a-3p	RNF138	ring finger protein 138									CDK6	ENST00000265734.4	cyclin-dependent kinase 6	1116
Details	1396	79	hsa-miR-190a-3p	MMRN1	multimerin 1									C15orf40	ENST00000304177.5	chromosome 15 open reading frame 40	133
Details	1397	79	hsa-miR-190a-3p	SAMSN1	SAM domain, SH3 domain and nuclear localization signals 1									NBN	ENST00000265433.3	nibrin	342
Details	1398	79	hsa-miR-190a-3p	KCNV1	potassium voltage-gated channel modifier subfamily V member 1									ACTN4	ENST00000252699.2	actinin, alpha 4	5688
Details	1399	79	hsa-miR-190a-3p	LYPD6	LY6/PLAUR domain containing 6									PTPN9	ENST00000306726.2	protein tyrosine phosphatase, non-receptor type 9	644
Details	1400	79	hsa-miR-190a-3p	WBP1L	WW domain binding protein 1 like									SVIP	ENST00000354193.4	small VCP/p97-interacting protein	521
Details	1401	79	hsa-miR-190a-3p	SNX7	sorting nexin 7									RUNX1	ENST00000344691.4	runt-related transcription factor 1	182
Details	1402	79	hsa-miR-190a-3p	ANP32A	acidic nuclear phosphoprotein 32 family member A									DDX17	ENST00000396821.3	DEAD (Asp-Glu-Ala-Asp) box helicase 17	2204
Details	1403	79	hsa-miR-190a-3p	BCL11B	BCL11B, BAF complex component									GSK3B	ENST00000264235.8	glycogen synthase kinase 3 beta	498
Details	1404	79	hsa-miR-190a-3p	SETD7	SET domain containing 7, histone lysine methyltransferase									SLC30A1	ENST00000367001.4	solute carrier family 30 (zinc transporter), member 1	831
Details	1405	79	hsa-miR-190a-3p	CRISP3	cysteine rich secretory protein 3									NAALAD2	ENST00000534061.1	N-acetylated alpha-linked acidic dipeptidase 2	5
Details	1406	79	hsa-miR-190a-3p	KIF16B	kinesin family member 16B									NDST3	ENST00000296499.5	N-deacetylase/N-sulfotransferase (heparan glucosaminyl) 3	5
Details	1407	79	hsa-miR-190a-3p	CCDC47	coiled-coil domain containing 47									STK36	ENST00000295709.3	serine/threonine kinase 36	218
Details	1408	79	hsa-miR-190a-3p	DHX15	DEAH-box helicase 15									UGT1A10	ENST00000344644.5	UDP glucuronosyltransferase 1 family, polypeptide A10	5
Details	1409	78	hsa-miR-190a-3p	PLEKHA1	pleckstrin homology domain containing A1									MTX2	ENST00000249442.6	metaxin 2	1837
Details	1410	78	hsa-miR-190a-3p	MC2R	melanocortin 2 receptor									SERPINA10	ENST00000554723.1	serpin peptidase inhibitor, clade A (alpha-1 antiproteinase, antitrypsin), member 10	7
Details	1411	78	hsa-miR-190a-3p	MOSPD1	motile sperm domain containing 1									CAPN12	ENST00000601953.1	calpain 12	14
Details	1412	78	hsa-miR-190a-3p	ALG6	ALG6, alpha-1,3-glucosyltransferase									SLFN5	ENST00000299977.4	schlafen family member 5	195
Details	1413	78	hsa-miR-190a-3p	DAZAP2	DAZ associated protein 2									STAM	ENST00000377524.3	signal transducing adaptor molecule (SH3 domain and ITAM motif) 1	723
Details	1414	78	hsa-miR-190a-3p	RETREG1	reticulophagy regulator 1									CYP2U1	ENST00000332884.6	cytochrome P450, family 2, subfamily U, polypeptide 1	202
Details	1415	78	hsa-miR-190a-3p	SNTG1	syntrophin gamma 1									TMTC3	ENST00000266712.6	transmembrane and tetratricopeptide repeat containing 3	406
Details	1416	78	hsa-miR-190a-3p	CAV2	caveolin 2									SMAD9	ENST00000399275.2	SMAD family member 9	62
Details	1417	78	hsa-miR-190a-3p	FHL5	four and a half LIM domains 5									CYP7B1	ENST00000310193.3	cytochrome P450, family 7, subfamily B, polypeptide 1	53
Details	1418	78	hsa-miR-190a-3p	LRRTM3	leucine rich repeat transmembrane neuronal 3									KIAA0247	ENST00000342745.4	KIAA0247	161
Details	1419	78	hsa-miR-190a-3p	CEP57	centrosomal protein 57									OTOR	ENST00000246081.2	otoraplin	5
Details	1420	78	hsa-miR-190a-3p	SMAD5	SMAD family member 5									SLC25A5	ENST00000317881.8	solute carrier family 25 (mitochondrial carrier; adenine nucleotide translocator), member 5	260
Details	1421	78	hsa-miR-190a-3p	FAM120A	family with sequence similarity 120A									ARHGEF35	ENST00000378115.2	Rho guanine nucleotide exchange factor (GEF) 35	5
Details	1422	78	hsa-miR-190a-3p	SRGN	serglycin									VCPKMT	ENST00000395860.2	valosin containing protein lysine (K) methyltransferase	10
Details	1423	78	hsa-miR-190a-3p	TTC17	tetratricopeptide repeat domain 17									ELK1	ENST00000247161.3	ELK1, member of ETS oncogene family	11
Details	1424	78	hsa-miR-190a-3p	SLC52A1	solute carrier family 52 member 1									SLC39A10	ENST00000409086.3	solute carrier family 39 (zinc transporter), member 10	511
Details	1425	78	hsa-miR-190a-3p	FUNDC2	FUN14 domain containing 2									ZNF260	ENST00000523638.1	zinc finger protein 260	165
Details	1426	78	hsa-miR-190a-3p	ABLIM3	actin binding LIM protein family member 3									COMMD2	ENST00000473414.1	COMM domain containing 2	833
Details	1427	78	hsa-miR-190a-3p	FGFR2	fibroblast growth factor receptor 2									C2orf88	ENST00000340623.4	chromosome 2 open reading frame 88	156
Details	1428	78	hsa-miR-190a-3p	SORBS1	sorbin and SH3 domain containing 1									MEF2C	ENST00000340208.5	myocyte enhancer factor 2C	70
Details	1429	78	hsa-miR-190a-3p	C9orf72	chromosome 9 open reading frame 72									HDAC1	ENST00000373548.3	histone deacetylase 1	83
Details	1430	78	hsa-miR-190a-3p	SRGAP3	SLIT-ROBO Rho GTPase activating protein 3									RORB	ENST00000376896.3	RAR-related orphan receptor B	5
Details	1431	78	hsa-miR-190a-3p	RPRD1B	regulation of nuclear pre-mRNA domain containing 1B									UNC80	ENST00000439458.1	unc-80 homolog (C. elegans)	5
Details	1432	78	hsa-miR-190a-3p	EFCAB14	EF-hand calcium binding domain 14									RAPGEF5	ENST00000401957.2	Rap guanine nucleotide exchange factor (GEF) 5	32
Details	1433	78	hsa-miR-190a-3p	TENT5D	terminal nucleotidyltransferase 5D									AMMECR1	ENST00000262844.5	Alport syndrome, mental retardation, midface hypoplasia and elliptocytosis chromosomal region gene 1	5
Details	1434	78	hsa-miR-190a-3p	CCNE2	cyclin E2									KIF3C	ENST00000264712.3	kinesin family member 3C	177
Details	1435	78	hsa-miR-190a-3p	MIER1	MIER1 transcriptional regulator									APBA1	ENST00000265381.4	amyloid beta (A4) precursor protein-binding, family A, member 1	12
Details	1436	78	hsa-miR-190a-3p	FCRL6	Fc receptor like 6									THSD7A	ENST00000423059.4	thrombospondin, type I, domain containing 7A	5
Details	1437	78	hsa-miR-190a-3p	SLC35A5	solute carrier family 35 member A5									CHM	ENST00000357749.2	choroideremia (Rab escort protein 1)	217
Details	1438	77	hsa-miR-190a-3p	DEPDC7	DEP domain containing 7									SPCS1	ENST00000233025.7	signal peptidase complex subunit 1 homolog (S. cerevisiae)	13730
Details	1439	77	hsa-miR-190a-3p	ANOS1	anosmin 1									KIAA2018	ENST00000316407.4	KIAA2018	23
Details	1440	77	hsa-miR-190a-3p	TRDN	triadin									REL	ENST00000295025.8	v-rel avian reticuloendotheliosis viral oncogene homolog	116
Details	1441	77	hsa-miR-190a-3p	EXTL3	exostosin like glycosyltransferase 3									GRID2	ENST00000282020.4	glutamate receptor, ionotropic, delta 2	5
Details	1442	77	hsa-miR-190a-3p	HACE1	HECT domain and ankyrin repeat containing E3 ubiquitin protein ligase 1									NLGN4X	ENST00000381095.3	neuroligin 4, X-linked	5
Details	1443	77	hsa-miR-190a-3p	RDH14	retinol dehydrogenase 14									TTYH3	ENST00000258796.7	tweety family member 3	188
Details	1444	77	hsa-miR-190a-3p	GOLIM4	golgi integral membrane protein 4									DAZ4	ENST00000382290.3	deleted in azoospermia 4	5
Details	1445	77	hsa-miR-190a-3p	NT5C1B-RDH14	NT5C1B-RDH14 readthrough									GRIK3	ENST00000373091.3	glutamate receptor, ionotropic, kainate 3	7
Details	1446	77	hsa-miR-190a-3p	SELENOI	selenoprotein I									SLC16A6	ENST00000327268.4	solute carrier family 16, member 6	17
Details	1447	77	hsa-miR-190a-3p	GAN	gigaxonin									POU2F2	ENST00000342301.4	POU class 2 homeobox 2	5
Details	1448	77	hsa-miR-190a-3p	API5	apoptosis inhibitor 5									ABCC5	ENST00000334444.6	ATP-binding cassette, sub-family C (CFTR/MRP), member 5	453
Details	1449	77	hsa-miR-190a-3p	ESRRA	estrogen related receptor alpha									PEX5L	ENST00000467460.1	peroxisomal biogenesis factor 5-like	5
Details	1450	77	hsa-miR-190a-3p	GPA33	glycoprotein A33									ERCC4	ENST00000311895.7	excision repair cross-complementing rodent repair deficiency, complementation group 4	261
Details	1451	77	hsa-miR-190a-3p	AREG	amphiregulin									EPS8	ENST00000543523.1	epidermal growth factor receptor pathway substrate 8	2643
Details	1452	77	hsa-miR-190a-3p	REEP5	receptor accessory protein 5									ITM2B	ENST00000378565.5	integral membrane protein 2B	10367
Details	1453	77	hsa-miR-190a-3p	HYKK	hydroxylysine kinase									TCEB1	ENST00000518127.1	transcription elongation factor B (SIII), polypeptide 1 (15kDa, elongin C)	637
Details	1454	77	hsa-miR-190a-3p	BLZF1	basic leucine zipper nuclear factor 1									GPR126	ENST00000230173.6	G protein-coupled receptor 126	604
Details	1455	77	hsa-miR-190a-3p	ZFP82	ZFP82 zinc finger protein									EPT1	ENST00000260585.7	ethanolaminephosphotransferase 1 (CDP-ethanolamine-specific)	449
Details	1456	77	hsa-miR-190a-3p	PARG	poly(ADP-ribose) glycohydrolase									RNF217	ENST00000521654.2	ring finger protein 217	92
Details	1457	77	hsa-miR-190a-3p	MARC2	mitochondrial amidoxime reducing component 2									DNAAF2	ENST00000298292.8	dynein, axonemal, assembly factor 2	78
Details	1458	77	hsa-miR-190a-3p	HOMER1	homer scaffold protein 1									BTAF1	ENST00000265990.6	BTAF1 RNA polymerase II, B-TFIID transcription factor-associated, 170kDa	917
Details	1459	77	hsa-miR-190a-3p	PUS7L	pseudouridine synthase 7 like									TMEM65	ENST00000297632.6	transmembrane protein 65	769
Details	1460	77	hsa-miR-190a-3p	ELP4	elongator acetyltransferase complex subunit 4									MCMBP	ENST00000360003.3	minichromosome maintenance complex binding protein	1411
Details	1461	77	hsa-miR-190a-3p	SLC40A1	solute carrier family 40 member 1									ZXDA	ENST00000358697.4	zinc finger, X-linked, duplicated A	25
Details	1462	77	hsa-miR-190a-3p	LRAT	lecithin retinol acyltransferase									ZNF230	ENST00000429154.2	zinc finger protein 230	236
Details	1463	77	hsa-miR-190a-3p	ZBTB1	zinc finger and BTB domain containing 1									OAT	ENST00000539214.1	ornithine aminotransferase	5
Details	1464	77	hsa-miR-190a-3p	FMNL2	formin like 2									CCDC68	ENST00000591504.1	coiled-coil domain containing 68	72
Details	1465	77	hsa-miR-190a-3p	SKA1	spindle and kinetochore associated complex subunit 1									HOXD1	ENST00000331462.4	homeobox D1	35
Details	1466	77	hsa-miR-190a-3p	NR1D2	nuclear receptor subfamily 1 group D member 2									CCDC177	ENST00000599174.1	Homo sapiens coiled-coil domain containing 177 (CCDC177), mRNA.	0
Details	1467	77	hsa-miR-190a-3p	ADCY3	adenylate cyclase 3									CENPN	ENST00000305850.5	centromere protein N	532
Details	1468	77	hsa-miR-190a-3p	CDC27	cell division cycle 27									ASB14	ENST00000487349.1	ankyrin repeat and SOCS box containing 14	5
Details	1469	77	hsa-miR-190a-3p	HLF	HLF, PAR bZIP transcription factor									TMF1	ENST00000398559.2	TATA element modulatory factor 1	349
Details	1470	77	hsa-miR-190a-3p	LOXL3	lysyl oxidase like 3									ZNF347	ENST00000334197.7	zinc finger protein 347	33
Details	1471	77	hsa-miR-190a-3p	THBS2	thrombospondin 2									B4GALT6	ENST00000306851.5	UDP-Gal:betaGlcNAc beta 1,4- galactosyltransferase, polypeptide 6	146
Details	1472	77	hsa-miR-190a-3p	MTX3	metaxin 3									WDR92	ENST00000295121.6	WD repeat domain 92	132
Details	1473	77	hsa-miR-190a-3p	BDNF	brain derived neurotrophic factor									DDX26B	ENST00000370752.4	DEAD/H (Asp-Glu-Ala-Asp/His) box polypeptide 26B	289
Details	1474	77	hsa-miR-190a-3p	TCEAL1	transcription elongation factor A like 1									HSPA13	ENST00000285667.3	heat shock protein 70kDa family, member 13	2175
Details	1475	77	hsa-miR-190a-3p	UBAP2L	ubiquitin associated protein 2 like									MAGEB18	ENST00000325250.1	melanoma antigen family B, 18	5
Details	1476	77	hsa-miR-190a-3p	LYSMD2	LysM domain containing 2									NFAT5	ENST00000354436.2	nuclear factor of activated T-cells 5, tonicity-responsive	128
Details	1477	77	hsa-miR-190a-3p	CPEB3	cytoplasmic polyadenylation element binding protein 3									ZNF804B	ENST00000333190.4	zinc finger protein 804B	0
Details	1478	77	hsa-miR-190a-3p	BROX	BRO1 domain and CAAX motif containing									UGT1A1	ENST00000373450.4	UDP glucuronosyltransferase 1 family, polypeptide A1	5
Details	1479	77	hsa-miR-190a-3p	KDM7A	lysine demethylase 7A									RBM7	ENST00000541475.1	RNA binding motif protein 7	46
Details	1480	77	hsa-miR-190a-3p	ARID4A	AT-rich interaction domain 4A									LUZP2	ENST00000533227.1	leucine zipper protein 2	33
Details	1481	76	hsa-miR-190a-3p	TMEM19	transmembrane protein 19									CALN1	ENST00000329008.5	calneuron 1	5
Details	1482	76	hsa-miR-190a-3p	RNF141	ring finger protein 141									STAG2	ENST00000371160.1	stromal antigen 2	216
Details	1483	76	hsa-miR-190a-3p	ATXN1	ataxin 1									FAM110C	ENST00000327669.4	family with sequence similarity 110, member C	29
Details	1484	76	hsa-miR-190a-3p	PIGZ	phosphatidylinositol glycan anchor biosynthesis class Z									POU4F2	ENST00000281321.3	POU class 4 homeobox 2	5
Details	1485	76	hsa-miR-190a-3p	SLC30A10	solute carrier family 30 member 10									AKAP7	ENST00000431975.2	A kinase (PRKA) anchor protein 7	21
Details	1486	76	hsa-miR-190a-3p	KCNA2	potassium voltage-gated channel subfamily A member 2									MAN1A1	ENST00000368468.3	mannosidase, alpha, class 1A, member 1	248
Details	1487	76	hsa-miR-190a-3p	ADAT2	adenosine deaminase, tRNA specific 2									ITGA1	ENST00000282588.6	integrin, alpha 1	400
Details	1488	76	hsa-miR-190a-3p	SLC12A1	solute carrier family 12 member 1									DAPK1	ENST00000469640.2	death-associated protein kinase 1	92
Details	1489	76	hsa-miR-190a-3p	RBM12	RNA binding motif protein 12									SCD	ENST00000370355.2	stearoyl-CoA desaturase (delta-9-desaturase)	9726
Details	1490	76	hsa-miR-190a-3p	VPS13A	vacuolar protein sorting 13 homolog A									HIST1H3B	ENST00000244661.2	histone cluster 1, H3b	7
Details	1491	76	hsa-miR-190a-3p	FOXG1	forkhead box G1									CLIP4	ENST00000320081.5	CAP-GLY domain containing linker protein family, member 4	490
Details	1492	76	hsa-miR-190a-3p	NECAB1	N-terminal EF-hand calcium binding protein 1									BMP2K	ENST00000335016.5	BMP2 inducible kinase	164
Details	1493	76	hsa-miR-190a-3p	SCOC	short coiled-coil protein									FOXJ3	ENST00000372571.1	forkhead box J3	329
Details	1494	76	hsa-miR-190a-3p	NTF3	neurotrophin 3									KIT	ENST00000288135.5	v-kit Hardy-Zuckerman 4 feline sarcoma viral oncogene homolog	329
Details	1495	76	hsa-miR-190a-3p	GRIN2B	glutamate ionotropic receptor NMDA type subunit 2B									PGAP1	ENST00000354764.4	post-GPI attachment to proteins 1	106
Details	1496	76	hsa-miR-190a-3p	SLC22A15	solute carrier family 22 member 15									ZNF516	ENST00000443185.2	zinc finger protein 516	311
Details	1497	76	hsa-miR-190a-3p	COLGALT2	collagen beta(1-O)galactosyltransferase 2									TRMT10A	ENST00000394877.3	tRNA methyltransferase 10 homolog A (S. cerevisiae)	89
Details	1498	76	hsa-miR-190a-3p	NAP1L1	nucleosome assembly protein 1 like 1									C3orf35	ENST00000426078.1	chromosome 3 open reading frame 35	14
Details	1499	76	hsa-miR-190a-3p	MAP3K20	mitogen-activated protein kinase kinase kinase 20									VPS37A	ENST00000324849.4	vacuolar protein sorting 37 homolog A (S. cerevisiae)	339
Details	1500	76	hsa-miR-190a-3p	PRNP	prion protein									KIAA0895	ENST00000297063.6	KIAA0895	1104
Details	1501	76	hsa-miR-190a-3p	ZNF345	zinc finger protein 345									BDP1	ENST00000380675.2	B double prime 1, subunit of RNA polymerase III transcription initiation factor IIIB	12
Details	1502	76	hsa-miR-190a-3p	SHISA3	shisa family member 3									GPR75	ENST00000394705.2	G protein-coupled receptor 75	35
Details	1503	76	hsa-miR-190a-3p	MTF2	metal response element binding transcription factor 2									C5orf24	ENST00000394976.3	chromosome 5 open reading frame 24	2668
Details	1504	76	hsa-miR-190a-3p	EDEM1	ER degradation enhancing alpha-mannosidase like protein 1									ZNF529	ENST00000334116.7	zinc finger protein 529	120
Details	1505	76	hsa-miR-190a-3p	POU3F3	POU class 3 homeobox 3									NBEAL1	ENST00000449802.1	neurobeachin-like 1	42
Details	1506	76	hsa-miR-190a-3p	MPPED2	metallophosphoesterase domain containing 2									MRFAP1L1	ENST00000320848.6	Morf4 family associated protein 1-like 1	77
Details	1507	76	hsa-miR-190a-3p	CCAR2	cell cycle and apoptosis regulator 2									ZFYVE16	ENST00000338008.5	zinc finger, FYVE domain containing 16	388
Details	1508	76	hsa-miR-190a-3p	PPP5D1	PPP5 tetratricopeptide repeat domain containing 1									SFRP1	ENST00000220772.3	secreted frizzled-related protein 1	148
Details	1509	76	hsa-miR-190a-3p	MINDY2	MINDY lysine 48 deubiquitinase 2									SUZ12	ENST00000322652.5	SUZ12 polycomb repressive complex 2 subunit	104
Details	1510	76	hsa-miR-190a-3p	ZNF599	zinc finger protein 599									RGS4	ENST00000531057.1	regulator of G-protein signaling 4	489
Details	1511	76	hsa-miR-190a-3p	POLR3C	RNA polymerase III subunit C									DOCK4	ENST00000428084.1	dedicator of cytokinesis 4	211
Details	1512	76	hsa-miR-190a-3p	SERINC1	serine incorporator 1									ADCYAP1	ENST00000579794.1	adenylate cyclase activating polypeptide 1 (pituitary)	35
Details	1513	76	hsa-miR-190a-3p	REST	RE1 silencing transcription factor									LCOR	ENST00000371103.3	ligand dependent nuclear receptor corepressor	94
Details	1514	76	hsa-miR-190a-3p	SOCS4	suppressor of cytokine signaling 4									PPTC7	ENST00000354300.3	PTC7 protein phosphatase homolog (S. cerevisiae)	817
Details	1515	76	hsa-miR-190a-3p	ZNF174	zinc finger protein 174									VWC2L	ENST00000427124.1	von Willebrand factor C domain containing protein 2-like	5
Details	1516	76	hsa-miR-190a-3p	MGA	MGA, MAX dimerization protein									MC2R	ENST00000327606.3	melanocortin 2 receptor (adrenocorticotropic hormone)	5
Details	1517	76	hsa-miR-190a-3p	SHCBP1	SHC binding and spindle associated 1									FAM153B	ENST00000253490.4	family with sequence similarity 153, member B	5
Details	1518	76	hsa-miR-190a-3p	VEPH1	ventricular zone expressed PH domain containing 1									NUPL1	ENST00000381736.3	nucleoporin like 1	268
Details	1519	75	hsa-miR-190a-3p	HOOK3	hook microtubule tethering protein 3									ZNF222	ENST00000391960.3	zinc finger protein 222	778
Details	1520	75	hsa-miR-190a-3p	TRUB1	TruB pseudouridine synthase family member 1									GDF15	ENST00000252809.3	growth differentiation factor 15	24
Details	1521	75	hsa-miR-190a-3p	SLC38A4	solute carrier family 38 member 4									ERLIN1	ENST00000421367.2	ER lipid raft associated 1	86
Details	1522	75	hsa-miR-190a-3p	GJA9	gap junction protein alpha 9									NTRK3	ENST00000394480.2	neurotrophic tyrosine kinase, receptor, type 3	7
Details	1523	75	hsa-miR-190a-3p	LRRC58	leucine rich repeat containing 58									NCS1	ENST00000372398.3	neuronal calcium sensor 1	1083
Details	1524	75	hsa-miR-190a-3p	FNDC1	fibronectin type III domain containing 1									PYGO1	ENST00000302000.6	pygopus homolog 1 (Drosophila)	104
Details	1525	75	hsa-miR-190a-3p	RSRC2	arginine and serine rich coiled-coil 2									FAM105A	ENST00000274217.3	family with sequence similarity 105, member A	2613
Details	1526	75	hsa-miR-190a-3p	ACTN4	actinin alpha 4									PAXBP1	ENST00000331923.4	PAX3 and PAX7 binding protein 1	340
Details	1527	75	hsa-miR-190a-3p	RAB6A	RAB6A, member RAS oncogene family									UNC50	ENST00000357765.2	unc-50 homolog (C. elegans)	163
Details	1528	75	hsa-miR-190a-3p	PRDM13	PR/SET domain 13									LMLN	ENST00000330198.4	leishmanolysin-like (metallopeptidase M8 family)	18
Details	1529	75	hsa-miR-190a-3p	C12orf4	chromosome 12 open reading frame 4									CNKSR2	ENST00000379510.3	connector enhancer of kinase suppressor of Ras 2	85
Details	1530	75	hsa-miR-190a-3p	ADGRL3	adhesion G protein-coupled receptor L3									SCYL3	ENST00000367771.6	SCY1-like 3 (S. cerevisiae)	124
Details	1531	75	hsa-miR-190a-3p	EMB	embigin									IGSF1	ENST00000370900.1	immunoglobulin superfamily, member 1	416
Details	1532	75	hsa-miR-190a-3p	SEPHS1	selenophosphate synthetase 1									HAPLN1	ENST00000274341.4	hyaluronan and proteoglycan link protein 1	5
Details	1533	75	hsa-miR-190a-3p	IL1RL1	interleukin 1 receptor like 1									BTNL3	ENST00000342868.6	butyrophilin-like 3	5
Details	1534	75	hsa-miR-190a-3p	DUSP10	dual specificity phosphatase 10									RALYL	ENST00000517638.1	RALY RNA binding protein-like	7
Details	1535	75	hsa-miR-190a-3p	EXOC5	exocyst complex component 5									USP15	ENST00000353364.3	ubiquitin specific peptidase 15	286
Details	1536	75	hsa-miR-190a-3p	MGLL	monoglyceride lipase									ACRV1	ENST00000533904.1	acrosomal vesicle protein 1	5
Details	1537	75	hsa-miR-190a-3p	CDK19	cyclin dependent kinase 19									TRAPPC13	ENST00000399438.3	trafficking protein particle complex 13	361
Details	1538	75	hsa-miR-190a-3p	TMEM65	transmembrane protein 65									ZNF714	ENST00000596053.1	zinc finger protein 714	61
Details	1539	75	hsa-miR-190a-3p	PHF6	PHD finger protein 6									LONRF2	ENST00000393437.3	LON peptidase N-terminal domain and ring finger 2	394
Details	1540	75	hsa-miR-190a-3p	FGFR1OP	FGFR1 oncogene partner									DCLRE1A	ENST00000361384.2	DNA cross-link repair 1A	12
Details	1541	75	hsa-miR-190a-3p	ODR4	odr-4 GPCR localization factor homolog									ACVR1C	ENST00000243349.8	activin A receptor, type IC	27
Details	1542	75	hsa-miR-190a-3p	PRUNE2	prune homolog 2 with BCH domain									CHCHD3	ENST00000542753.1	coiled-coil-helix-coiled-coil-helix domain containing 3	63
Details	1543	75	hsa-miR-190a-3p	REEP3	receptor accessory protein 3									EBAG9	ENST00000337573.5	estrogen receptor binding site associated, antigen, 9	238
Details	1544	75	hsa-miR-190a-3p	RPS6KB1	ribosomal protein S6 kinase B1									SGMS2	ENST00000394684.4	sphingomyelin synthase 2	111
Details	1545	75	hsa-miR-190a-3p	MN1	MN1 proto-oncogene, transcriptional regulator									STX16	ENST00000355957.5	syntaxin 16	756
Details	1546	75	hsa-miR-190a-3p	MFSD4B	major facilitator superfamily domain containing 4B									CAMK2D	ENST00000296402.5	calcium/calmodulin-dependent protein kinase II delta	938
Details	1547	75	hsa-miR-190a-3p	PMP22	peripheral myelin protein 22									SNCAIP	ENST00000261368.8	synuclein, alpha interacting protein	236
Details	1548	75	hsa-miR-190a-3p	NCALD	neurocalcin delta									TRIP10	ENST00000313285.8	thyroid hormone receptor interactor 10	5
Details	1549	75	hsa-miR-190a-3p	COG6	component of oligomeric golgi complex 6									C8orf37	ENST00000286688.5	chromosome 8 open reading frame 37	70
Details	1550	75	hsa-miR-190a-3p	ZNF804A	zinc finger protein 804A									GABPB2	ENST00000368918.3	GA binding protein transcription factor, beta subunit 2	35
Details	1551	74	hsa-miR-190a-3p	NSL1	NSL1, MIS12 kinetochore complex component									GCSAML	ENST00000366488.4	germinal center-associated, signaling and motility-like	5
Details	1552	74	hsa-miR-190a-3p	IPO8	importin 8									SIX4	ENST00000216513.4	SIX homeobox 4	94
Details	1553	74	hsa-miR-190a-3p	ZNF518A	zinc finger protein 518A									LDHAL6A	ENST00000280706.2	lactate dehydrogenase A-like 6A	5
Details	1554	74	hsa-miR-190a-3p	GAD1	glutamate decarboxylase 1									TAS2R30	ENST00000539585.1	taste receptor, type 2, member 30	5
Details	1555	74	hsa-miR-190a-3p	MYOZ2	myozenin 2									AC117834.1	ENST00000391681.1		5
Details	1556	74	hsa-miR-190a-3p	OPRM1	opioid receptor mu 1									ZNF300	ENST00000427179.1	zinc finger protein 300	107
Details	1557	74	hsa-miR-190a-3p	MIB1	mindbomb E3 ubiquitin protein ligase 1									AGPAT3	ENST00000291572.8	1-acylglycerol-3-phosphate O-acyltransferase 3	2443
Details	1558	74	hsa-miR-190a-3p	MYCBP2	MYC binding protein 2, E3 ubiquitin protein ligase									PRRG4	ENST00000257836.3	proline rich Gla (G-carboxyglutamic acid) 4 (transmembrane)	47
Details	1559	74	hsa-miR-190a-3p	EDNRA	endothelin receptor type A									ZNF117	ENST00000282869.6	zinc finger protein 117	21
Details	1560	74	hsa-miR-190a-3p	ESRRG	estrogen related receptor gamma									ZNF264	ENST00000263095.6	zinc finger protein 264	412
Details	1561	74	hsa-miR-190a-3p	GPR6	G protein-coupled receptor 6									SLC5A12	ENST00000396005.3	solute carrier family 5 (sodium/monocarboxylate cotransporter), member 12	8
Details	1562	74	hsa-miR-190a-3p	ERLEC1	endoplasmic reticulum lectin 1									ZEB2	ENST00000558170.2	zinc finger E-box binding homeobox 2	33
Details	1563	74	hsa-miR-190a-3p	FXR1	FMR1 autosomal homolog 1									PNMA1	ENST00000316836.3	paraneoplastic Ma antigen 1	70
Details	1564	74	hsa-miR-190a-3p	CC2D1B	coiled-coil and C2 domain containing 1B									GGH	ENST00000260118.6	gamma-glutamyl hydrolase (conjugase, folylpolygammaglutamyl hydrolase)	248
Details	1565	74	hsa-miR-190a-3p	CORIN	corin, serine peptidase									PCDH7	ENST00000543491.1	protocadherin 7	95
Details	1566	74	hsa-miR-190a-3p	MERTK	MER proto-oncogene, tyrosine kinase									ADCY9	ENST00000294016.3	adenylate cyclase 9	166
Details	1567	74	hsa-miR-190a-3p	SLC5A1	solute carrier family 5 member 1									ZNF37A	ENST00000361085.5	zinc finger protein 37A	11
Details	1568	74	hsa-miR-190a-3p	RASSF8	Ras association domain family member 8									WDR12	ENST00000261015.4	WD repeat domain 12	444
Details	1569	74	hsa-miR-190a-3p	C1RL	complement C1r subcomponent like									FAM72B	ENST00000369390.3	family with sequence similarity 72, member B	5
Details	1570	74	hsa-miR-190a-3p	MYO5A	myosin VA									FAM72D	ENST00000400889.1	family with sequence similarity 72, member D	5
Details	1571	74	hsa-miR-190a-3p	SERBP1	SERPINE1 mRNA binding protein 1									FAM72A	ENST00000367128.3	family with sequence similarity 72, member A	5
Details	1572	74	hsa-miR-190a-3p	RANBP3L	RAN binding protein 3 like									ORAI3	ENST00000318663.4	ORAI calcium release-activated calcium modulator 3	565
Details	1573	74	hsa-miR-190a-3p	METAP1	methionyl aminopeptidase 1									F11	ENST00000264692.4	coagulation factor XI	5
Details	1574	74	hsa-miR-190a-3p	FBXO36	F-box protein 36									SRF	ENST00000265354.4	serum response factor (c-fos serum response element-binding transcription factor)	596
Details	1575	74	hsa-miR-190a-3p	GPR180	G protein-coupled receptor 180									DKK1	ENST00000373970.3	dickkopf WNT signaling pathway inhibitor 1	2384
Details	1576	74	hsa-miR-190a-3p	UBE2W	ubiquitin conjugating enzyme E2 W									NFKBIZ	ENST00000394054.2	nuclear factor of kappa light polypeptide gene enhancer in B-cells inhibitor, zeta	236
Details	1577	74	hsa-miR-190a-3p	LMLN	leishmanolysin like peptidase									OSTN	ENST00000445281.1	osteocrin	14
Details	1578	74	hsa-miR-190a-3p	PTP4A1	protein tyrosine phosphatase type IVA, member 1									TNRC6B	ENST00000335727.9	trinucleotide repeat containing 6B	69
Details	1579	74	hsa-miR-190a-3p	LUC7L2	LUC7 like 2, pre-mRNA splicing factor									MAP3K8	ENST00000375321.1	mitogen-activated protein kinase kinase kinase 8	22
Details	1580	74	hsa-miR-190a-3p	ST6GALNAC3	ST6 N-acetylgalactosaminide alpha-2,6-sialyltransferase 3									DPF3	ENST00000541685.1	D4, zinc and double PHD fingers, family 3	5
Details	1581	74	hsa-miR-190a-3p	SERPINB8	serpin family B member 8									KIAA1407	ENST00000295878.3	KIAA1407	44
Details	1582	74	hsa-miR-190a-3p	RALGPS2	Ral GEF with PH domain and SH3 binding motif 2									MGLL	ENST00000434178.2	monoglyceride lipase	453
Details	1583	74	hsa-miR-190a-3p	USP8	ubiquitin specific peptidase 8									POU2F1	ENST00000367866.2	POU class 2 homeobox 1	83
Details	1584	74	hsa-miR-190a-3p	TRPM7	transient receptor potential cation channel subfamily M member 7									PAPSS2	ENST00000361175.4	3'-phosphoadenosine 5'-phosphosulfate synthase 2	874
Details	1585	74	hsa-miR-190a-3p	KMT2A	lysine methyltransferase 2A									LMBR1	ENST00000353442.5	limb development membrane protein 1	1435
Details	1586	74	hsa-miR-190a-3p	RNF165	ring finger protein 165									NEMF	ENST00000298310.5	nuclear export mediator factor	18
Details	1587	73	hsa-miR-190a-3p	SBF2	SET binding factor 2									PIK3C2A	ENST00000265970.7	phosphatidylinositol-4-phosphate 3-kinase, catalytic subunit type 2 alpha	280
Details	1588	73	hsa-miR-190a-3p	MYH10	myosin heavy chain 10									B3GAT2	ENST00000230053.6	beta-1,3-glucuronyltransferase 2 (glucuronosyltransferase S)	39
Details	1589	73	hsa-miR-190a-3p	RGS13	regulator of G protein signaling 13									RNF212	ENST00000382968.5	ring finger protein 212	66
Details	1590	73	hsa-miR-190a-3p	MAP3K9	mitogen-activated protein kinase kinase kinase 9									CCDC50	ENST00000392455.3	coiled-coil domain containing 50	961
Details	1591	73	hsa-miR-190a-3p	USP42	ubiquitin specific peptidase 42									MXRA5	ENST00000217939.6	matrix-remodelling associated 5	5
Details	1592	73	hsa-miR-190a-3p	ZNF490	zinc finger protein 490									FZD10	ENST00000539839.1	frizzled family receptor 10	36
Details	1593	73	hsa-miR-190a-3p	GCLM	glutamate-cysteine ligase modifier subunit									IL36G	ENST00000259205.4	interleukin 36, gamma	5
Details	1594	73	hsa-miR-190a-3p	ESF1	ESF1 nucleolar pre-rRNA processing protein homolog									RNF186	ENST00000375121.2	ring finger protein 186	19
Details	1595	73	hsa-miR-190a-3p	SIRT1	sirtuin 1									ZNF92	ENST00000328747.7	zinc finger protein 92	99
Details	1596	73	hsa-miR-190a-3p	TSC22D2	TSC22 domain family member 2									S100A7A	ENST00000368729.4	S100 calcium binding protein A7A	5
Details	1597	73	hsa-miR-190a-3p	CYREN	cell cycle regulator of NHEJ									NHLH2	ENST00000320238.3	nescient helix loop helix 2	16
Details	1598	73	hsa-miR-190a-3p	PHLDB2	pleckstrin homology like domain family B member 2									GMPS	ENST00000496455.2	guanine monphosphate synthase	867
Details	1599	73	hsa-miR-190a-3p	CCDC59	coiled-coil domain containing 59									AC012215.1	ENST00000437887.1	Uncharacterized protein	31
Details	1600	73	hsa-miR-190a-3p	PRKAA1	protein kinase AMP-activated catalytic subunit alpha 1									CHRM3	ENST00000255380.4	cholinergic receptor, muscarinic 3	47
Details	1601	73	hsa-miR-190a-3p	ADH1B	alcohol dehydrogenase 1B (class I), beta polypeptide									MEGF11	ENST00000360698.4	multiple EGF-like-domains 11	7
Details	1602	73	hsa-miR-190a-3p	AASS	aminoadipate-semialdehyde synthase									PTPRD	ENST00000381196.4	protein tyrosine phosphatase, receptor type, D	101
Details	1603	73	hsa-miR-190a-3p	RAB2A	RAB2A, member RAS oncogene family									TBC1D15	ENST00000550746.1	TBC1 domain family, member 15	1164
Details	1604	73	hsa-miR-190a-3p	WWC3	WWC family member 3									KIAA1715	ENST00000272748.4	KIAA1715	858
Details	1605	73	hsa-miR-190a-3p	KLHL32	kelch like family member 32									RTF1	ENST00000389629.4	Rtf1, Paf1/RNA polymerase II complex component, homolog (S. cerevisiae)	1869
Details	1606	73	hsa-miR-190a-3p	VCAN	versican									KIAA1919	ENST00000368847.4	KIAA1919	73
Details	1607	73	hsa-miR-190a-3p	HERPUD1	homocysteine inducible ER protein with ubiquitin like domain 1									FMNL2	ENST00000475377.2	formin-like 2	31
Details	1608	73	hsa-miR-190a-3p	ACACB	acetyl-CoA carboxylase beta									SOX7	ENST00000554914.1	Transcription factor SOX-7; Uncharacterized protein; cDNA FLJ58508, highly similar to Transcription factor SOX-7	47
Details	1609	73	hsa-miR-190a-3p	CD302	CD302 molecule									NXPH2	ENST00000272641.3	neurexophilin 2	82
Details	1610	73	hsa-miR-190a-3p	PLA2G4A	phospholipase A2 group IVA									IMPA1	ENST00000311489.4	inositol(myo)-1(or 4)-monophosphatase 1	309
Details	1611	73	hsa-miR-190a-3p	SPIN3	spindlin family member 3									PACSIN1	ENST00000244458.2	protein kinase C and casein kinase substrate in neurons 1	25
Details	1612	73	hsa-miR-190a-3p	CALM1	calmodulin 1									PEG3	ENST00000423103.2	paternally expressed 3	5
Details	1613	73	hsa-miR-190a-3p	SEPT10	septin 10									HIVEP1	ENST00000379388.2	human immunodeficiency virus type I enhancer binding protein 1	781
Details	1614	73	hsa-miR-190a-3p	C3orf14	chromosome 3 open reading frame 14									OPN3	ENST00000366554.2	opsin 3	208
Details	1615	73	hsa-miR-190a-3p	TESPA1	thymocyte expressed, positive selection associated 1									FCGR1B	ENST00000369384.4	Fc fragment of IgG, high affinity Ib, receptor (CD64)	5
Details	1616	73	hsa-miR-190a-3p	BEX4	brain expressed X-linked 4									ZBTB20	ENST00000462705.1	zinc finger and BTB domain containing 20	5
Details	1617	73	hsa-miR-190a-3p	FAM199X	family with sequence similarity 199, X-linked									GABRA1	ENST00000428797.2	gamma-aminobutyric acid (GABA) A receptor, alpha 1	5
Details	1618	73	hsa-miR-190a-3p	PRR5L	proline rich 5 like									ZNF391	ENST00000244576.4	zinc finger protein 391	63
Details	1619	73	hsa-miR-190a-3p	LY75-CD302	LY75-CD302 readthrough									AC022498.1	ENST00000392468.2	Uncharacterized protein	5
Details	1620	73	hsa-miR-190a-3p	MEGF10	multiple EGF like domains 10									MFSD2B	ENST00000338315.4	major facilitator superfamily domain containing 2B	8
Details	1621	73	hsa-miR-190a-3p	FRMD4B	FERM domain containing 4B									PDHB	ENST00000474765.1	pyruvate dehydrogenase (lipoamide) beta	1549
Details	1622	72	hsa-miR-190a-3p	EPHA2	EPH receptor A2									CLDN1	ENST00000295522.3	claudin 1	153
Details	1623	72	hsa-miR-190a-3p	MAGI3	membrane associated guanylate kinase, WW and PDZ domain containing 3									G3BP2	ENST00000395719.3	GTPase activating protein (SH3 domain) binding protein 2	4413
Details	1624	72	hsa-miR-190a-3p	CLHC1	clathrin heavy chain linker domain containing 1									ZC3H8	ENST00000409573.2	zinc finger CCCH-type containing 8	216
Details	1625	72	hsa-miR-190a-3p	TMX3	thioredoxin related transmembrane protein 3									RASSF8	ENST00000541490.1	Ras association (RalGDS/AF-6) domain family (N-terminal) member 8	1290
Details	1626	72	hsa-miR-190a-3p	RREB1	ras responsive element binding protein 1									SLC30A4	ENST00000261867.4	solute carrier family 30 (zinc transporter), member 4	19
Details	1627	72	hsa-miR-190a-3p	NAB1	NGFI-A binding protein 1									DYNC1I2	ENST00000409453.1	dynein, cytoplasmic 1, intermediate chain 2	69
Details	1628	72	hsa-miR-190a-3p	ZNF552	zinc finger protein 552									PLEKHM3	ENST00000427836.2	pleckstrin homology domain containing, family M, member 3	11
Details	1629	72	hsa-miR-190a-3p	ARHGEF7	Rho guanine nucleotide exchange factor 7									UBE2D1	ENST00000373910.4	ubiquitin-conjugating enzyme E2D 1	200
Details	1630	72	hsa-miR-190a-3p	KLF3	Kruppel like factor 3									TRAM1	ENST00000521425.1	translocation associated membrane protein 1	790
Details	1631	72	hsa-miR-190a-3p	ARMT1	acidic residue methyltransferase 1									VEZT	ENST00000436874.1	vezatin, adherens junctions transmembrane protein	1054
Details	1632	72	hsa-miR-190a-3p	PDE3B	phosphodiesterase 3B									PABPC4L	ENST00000421491.3	poly(A) binding protein, cytoplasmic 4-like	55
Details	1633	72	hsa-miR-190a-3p	DCAF10	DDB1 and CUL4 associated factor 10									FBXL3	ENST00000355619.5	F-box and leucine-rich repeat protein 3	842
Details	1634	72	hsa-miR-190a-3p	FAM133B	family with sequence similarity 133 member B									PDE4D	ENST00000340635.6	phosphodiesterase 4D, cAMP-specific	747
Details	1635	72	hsa-miR-190a-3p	PTK2	protein tyrosine kinase 2									GK	ENST00000378946.3	glycerol kinase	38
Details	1636	72	hsa-miR-190a-3p	OGA	O-GlcNAcase									SLCO1A2	ENST00000307378.6	solute carrier organic anion transporter family, member 1A2	5
Details	1637	72	hsa-miR-190a-3p	FABP7	fatty acid binding protein 7									AC015987.2	ENST00000416501.1		5
Details	1638	72	hsa-miR-190a-3p	FAM13B	family with sequence similarity 13 member B									FRMPD3	ENST00000276185.4	FERM and PDZ domain containing 3	0
Details	1639	72	hsa-miR-190a-3p	ZNF180	zinc finger protein 180									C9orf84	ENST00000394779.3	chromosome 9 open reading frame 84	5
Details	1640	72	hsa-miR-190a-3p	MFSD14B	major facilitator superfamily domain containing 14B									MAML3	ENST00000509479.2	mastermind-like 3 (Drosophila)	159
Details	1641	72	hsa-miR-190a-3p	SLC4A10	solute carrier family 4 member 10									APOL6	ENST00000409652.4	apolipoprotein L, 6	5
Details	1642	72	hsa-miR-190a-3p	NCAM2	neural cell adhesion molecule 2									DGKG	ENST00000265022.3	diacylglycerol kinase, gamma 90kDa	5
Details	1643	72	hsa-miR-190a-3p	EVI2B	ecotropic viral integration site 2B									IRS2	ENST00000375856.3	insulin receptor substrate 2	231
Details	1644	72	hsa-miR-190a-3p	SLC6A6	solute carrier family 6 member 6									OTOGL	ENST00000458043.2	otogelin-like	5
Details	1645	72	hsa-miR-190a-3p	KIAA1328	KIAA1328									MYO5B	ENST00000285039.7	myosin VB	12
Details	1646	72	hsa-miR-190a-3p	CYLC2	cylicin 2									SCP2	ENST00000488965.1	sterol carrier protein 2	3640
Details	1647	72	hsa-miR-190a-3p	AQP4	aquaporin 4									MYO1E	ENST00000288235.4	myosin IE	198
Details	1648	72	hsa-miR-190a-3p	WNK3	WNK lysine deficient protein kinase 3									ASXL3	ENST00000269197.5	additional sex combs like 3 (Drosophila)	65
Details	1649	72	hsa-miR-190a-3p	AGFG2	ArfGAP with FG repeats 2									KPNA5	ENST00000368564.1	karyopherin alpha 5 (importin alpha 6)	76
Details	1650	72	hsa-miR-190a-3p	CLINT1	clathrin interactor 1									FER	ENST00000281092.4	fer (fps/fes related) tyrosine kinase	665
Details	1651	72	hsa-miR-190a-3p	MTAP	methylthioadenosine phosphorylase									ZNF551	ENST00000282296.5	zinc finger protein 551	49
Details	1652	72	hsa-miR-190a-3p	LYRM7	LYR motif containing 7									OSMR	ENST00000274276.3	oncostatin M receptor	2781
Details	1653	72	hsa-miR-190a-3p	POLI	DNA polymerase iota									CRIM1	ENST00000280527.2	cysteine rich transmembrane BMP regulator 1 (chordin-like)	4842
Details	1654	72	hsa-miR-190a-3p	COLEC12	collectin subfamily member 12									HIST1H2BN	ENST00000606613.1	histone cluster 1, H2bn	29
Details	1655	72	hsa-miR-190a-3p	FBXO25	F-box protein 25									SLC8A1	ENST00000406785.2	solute carrier family 8 (sodium/calcium exchanger), member 1	61
Details	1656	72	hsa-miR-190a-3p	RGMB	repulsive guidance molecule BMP co-receptor b									TSPAN2	ENST00000369516.2	tetraspanin 2	43
Details	1657	72	hsa-miR-190a-3p	CAMSAP2	calmodulin regulated spectrin associated protein family member 2									NKX6-1	ENST00000515820.2	NK6 homeobox 1	9
Details	1658	72	hsa-miR-190a-3p	USP32	ubiquitin specific peptidase 32									SLC10A1	ENST00000216540.4	solute carrier family 10 (sodium/bile acid cotransporter), member 1	5
Details	1659	72	hsa-miR-190a-3p	UNC80	unc-80 homolog, NALCN channel complex subunit									PPP1CB	ENST00000395366.2	protein phosphatase 1, catalytic subunit, beta isozyme	5795
Details	1660	72	hsa-miR-190a-3p	PPM1L	protein phosphatase, Mg2+/Mn2+ dependent 1L									ZNF860	ENST00000360311.4	zinc finger protein 860	85
Details	1661	72	hsa-miR-190a-3p	MTMR7	myotubularin related protein 7									FAM150B	ENST00000403610.4	family with sequence similarity 150, member B	7
Details	1662	72	hsa-miR-190a-3p	PRDM16	PR/SET domain 16									MBL2	ENST00000373968.3	mannose-binding lectin (protein C) 2, soluble	5
Details	1663	72	hsa-miR-190a-3p	PRRC2B	proline rich coiled-coil 2B									COQ7	ENST00000321998.5	coenzyme Q7 homolog, ubiquinone (yeast)	315
Details	1664	71	hsa-miR-190a-3p	ELK1	ELK1, ETS transcription factor									RICTOR	ENST00000357387.3	RPTOR independent companion of MTOR, complex 2	441
Details	1665	71	hsa-miR-190a-3p	GPD1L	glycerol-3-phosphate dehydrogenase 1 like									SOWAHC	ENST00000356454.3	sosondowah ankyrin repeat domain family member C	431
Details	1666	71	hsa-miR-190a-3p	PSD3	pleckstrin and Sec7 domain containing 3									LAMP2	ENST00000371335.4	lysosomal-associated membrane protein 2	3095
Details	1667	71	hsa-miR-190a-3p	CASKIN1	CASK interacting protein 1									ZMYND11	ENST00000381591.1	zinc finger, MYND-type containing 11	43
Details	1668	71	hsa-miR-190a-3p	COQ7	coenzyme Q7, hydroxylase									C21orf91	ENST00000400558.3	chromosome 21 open reading frame 91	998
Details	1669	71	hsa-miR-190a-3p	STXBP4	syntaxin binding protein 4									BCL9L	ENST00000334801.3	B-cell CLL/lymphoma 9-like	91
Details	1670	71	hsa-miR-190a-3p	ASF1A	anti-silencing function 1A histone chaperone									WDFY3	ENST00000322366.6	WD repeat and FYVE domain containing 3	596
Details	1671	71	hsa-miR-190a-3p	DENND4C	DENN domain containing 4C									XRN1	ENST00000264951.4	5'-3' exoribonuclease 1	612
Details	1672	71	hsa-miR-190a-3p	ABAT	4-aminobutyrate aminotransferase									HIAT1	ENST00000370152.3	hippocampus abundant transcript 1	1473
Details	1673	71	hsa-miR-190a-3p	SEC24D	SEC24 homolog D, COPII coat complex component									PPP1R15A	ENST00000200453.5	protein phosphatase 1, regulatory subunit 15A	2130
Details	1674	71	hsa-miR-190a-3p	FSBP	fibrinogen silencer binding protein									ATP5L	ENST00000300688.3	ATP synthase, H+ transporting, mitochondrial Fo complex, subunit G	5386
Details	1675	71	hsa-miR-190a-3p	ANGPTL3	angiopoietin like 3									AP5M1	ENST00000261558.3	adaptor-related protein complex 5, mu 1 subunit	198
Details	1676	71	hsa-miR-190a-3p	DSCAML1	DS cell adhesion molecule like 1									ZNF470	ENST00000330619.8	zinc finger protein 470	12
Details	1677	71	hsa-miR-190a-3p	CAT	catalase									LHFPL2	ENST00000515007.2	lipoma HMGIC fusion partner-like 2	16
Details	1678	71	hsa-miR-190a-3p	DIMT1	DIM1 dimethyladenosine transferase 1 homolog									PIGW	ENST00000328396.2	phosphatidylinositol glycan anchor biosynthesis, class W	265
Details	1679	71	hsa-miR-190a-3p	RAB3C	RAB3C, member RAS oncogene family									RFX3	ENST00000382004.3	regulatory factor X, 3 (influences HLA class II expression)	37
Details	1680	71	hsa-miR-190a-3p	SNX14	sorting nexin 14									RSC1A1	ENST00000345034.1	regulatory solute carrier protein, family 1, member 1	352
Details	1681	71	hsa-miR-190a-3p	ANKRD13C	ankyrin repeat domain 13C									TMPRSS11A	ENST00000508048.1	transmembrane protease, serine 11A	5
Details	1682	71	hsa-miR-190a-3p	CLOCK	clock circadian regulator									GOLPH3	ENST00000265070.6	golgi phosphoprotein 3 (coat-protein)	1157
Details	1683	71	hsa-miR-190a-3p	CENPQ	centromere protein Q									FBXO36	ENST00000373652.3	F-box protein 36	5
Details	1684	71	hsa-miR-190a-3p	COL27A1	collagen type XXVII alpha 1 chain									RAG2	ENST00000311485.3	recombination activating gene 2	5
Details	1685	71	hsa-miR-190a-3p	PAFAH1B2	platelet activating factor acetylhydrolase 1b catalytic subunit 2									EPHA2	ENST00000358432.5	EPH receptor A2	2378
Details	1686	71	hsa-miR-190a-3p	COL4A4	collagen type IV alpha 4 chain									NTM	ENST00000374791.3	neurotrimin	231
Details	1687	71	hsa-miR-190a-3p	SGCZ	sarcoglycan zeta									RBM41	ENST00000372487.1	RNA binding motif protein 41	41
Details	1688	71	hsa-miR-190a-3p	MTPN	myotrophin									GTF2H3	ENST00000543341.2	general transcription factor IIH, polypeptide 3, 34kDa	718
Details	1689	71	hsa-miR-190a-3p	TTC21B	tetratricopeptide repeat domain 21B									MSANTD2	ENST00000239614.4	Myb/SANT-like DNA-binding domain containing 2	50
Details	1690	71	hsa-miR-190a-3p	HMGN3	high mobility group nucleosomal binding domain 3									CXCL9	ENST00000264888.5	chemokine (C-X-C motif) ligand 9	5
Details	1691	71	hsa-miR-190a-3p	SH3BGRL2	SH3 domain binding glutamate rich protein like 2									DOK4	ENST00000566936.1	docking protein 4	183
Details	1692	71	hsa-miR-190a-3p	MFSD14A	major facilitator superfamily domain containing 14A									CDYL2	ENST00000570137.2	chromodomain protein, Y-like 2	239
Details	1693	71	hsa-miR-190a-3p	SLC6A11	solute carrier family 6 member 11									CRISPLD1	ENST00000262207.4	cysteine-rich secretory protein LCCL domain containing 1	358
Details	1694	70	hsa-miR-190a-3p	LRRC10	leucine rich repeat containing 10									ZNF41	ENST00000313116.7	zinc finger protein 41	86
Details	1695	70	hsa-miR-190a-3p	AHCTF1	AT-hook containing transcription factor 1									PTPRK	ENST00000368226.4	protein tyrosine phosphatase, receptor type, K	641
Details	1696	70	hsa-miR-190a-3p	C18orf63	chromosome 18 open reading frame 63									FUBP1	ENST00000370767.1	far upstream element (FUSE) binding protein 1	2021
Details	1697	70	hsa-miR-190a-3p	ZNF713	zinc finger protein 713									KLHL20	ENST00000209884.4	kelch-like family member 20	324
Details	1698	70	hsa-miR-190a-3p	CABCOCO1	ciliary associated calcium binding coiled-coil 1									NFIB	ENST00000397575.3	nuclear factor I/B	1149
Details	1699	70	hsa-miR-190a-3p	PYGO1	pygopus family PHD finger 1									PCDH20	ENST00000409204.4	protocadherin 20	50
Details	1700	70	hsa-miR-190a-3p	HMCN1	hemicentin 1									SPPL3	ENST00000353487.2	signal peptide peptidase like 3	799
Details	1701	70	hsa-miR-190a-3p	CALU	calumenin									ZNF546	ENST00000347077.4	zinc finger protein 546	44
Details	1702	70	hsa-miR-190a-3p	OSBPL5	oxysterol binding protein like 5									COL9A3	ENST00000343916.3	collagen, type IX, alpha 3	37
Details	1703	70	hsa-miR-190a-3p	ADH7	alcohol dehydrogenase 7 (class IV), mu or sigma polypeptide									SLC25A13	ENST00000265631.5	solute carrier family 25 (aspartate/glutamate carrier), member 13	8
Details	1704	70	hsa-miR-190a-3p	MEAF6	MYST/Esa1 associated factor 6									TMEM189-UBE2V1	ENST00000341698.2	TMEM189-UBE2V1 readthrough	1621
Details	1705	70	hsa-miR-190a-3p	KCNQ3	potassium voltage-gated channel subfamily Q member 3									ZNF793	ENST00000445217.1	zinc finger protein 793	22
Details	1706	70	hsa-miR-190a-3p	RASGEF1A	RasGEF domain family member 1A									NUP107	ENST00000229179.4	nucleoporin 107kDa	630
Details	1707	70	hsa-miR-190a-3p	EPHB1	EPH receptor B1									SLC4A7	ENST00000295736.5	solute carrier family 4, sodium bicarbonate cotransporter, member 7	146
Details	1708	70	hsa-miR-190a-3p	SPDYE6	speedy/RINGO cell cycle regulator family member E6									PSMC3IP	ENST00000393795.3	PSMC3 interacting protein	42
Details	1709	70	hsa-miR-190a-3p	TMEM64	transmembrane protein 64									LOXL3	ENST00000264094.3	lysyl oxidase-like 3	235
Details	1710	70	hsa-miR-190a-3p	KIT	KIT proto-oncogene receptor tyrosine kinase									ZNF561	ENST00000326044.5	zinc finger protein 561	156
Details	1711	70	hsa-miR-190a-3p	SPDYE5	speedy/RINGO cell cycle regulator family member E5									KCTD12	ENST00000377474.2	potassium channel tetramerization domain containing 12	404
Details	1712	70	hsa-miR-190a-3p	GRTP1	growth hormone regulated TBC protein 1									FBXO30	ENST00000237281.4	F-box protein 30	224
Details	1713	70	hsa-miR-190a-3p	GIPC2	GIPC PDZ domain containing family member 2									FZD2	ENST00000315323.3	frizzled family receptor 2	807
Details	1714	70	hsa-miR-190a-3p	HPS5	HPS5, biogenesis of lysosomal organelles complex 2 subunit 2									UCP1	ENST00000262999.3	uncoupling protein 1 (mitochondrial, proton carrier)	14
Details	1715	70	hsa-miR-190a-3p	DNAJB7	DnaJ heat shock protein family (Hsp40) member B7									TMEM189	ENST00000557021.1	transmembrane protein 189	1621
Details	1716	70	hsa-miR-190a-3p	SLC7A2	solute carrier family 7 member 2									CLRN1	ENST00000327047.1	clarin 1	5
Details	1717	70	hsa-miR-190a-3p	DPP6	dipeptidyl peptidase like 6									LINC00955	ENST00000514422.1	long intergenic non-protein coding RNA 955	5
Details	1718	70	hsa-miR-190a-3p	YPEL2	yippee like 2									ABCB5	ENST00000404938.2	ATP-binding cassette, sub-family B (MDR/TAP), member 5	5
Details	1719	70	hsa-miR-190a-3p	NCEH1	neutral cholesterol ester hydrolase 1									NEDD4	ENST00000338963.2	neural precursor cell expressed, developmentally down-regulated 4, E3 ubiquitin protein ligase	289
Details	1720	70	hsa-miR-190a-3p	FKTN	fukutin									TTBK2	ENST00000267890.6	tau tubulin kinase 2	18
Details	1721	70	hsa-miR-190a-3p	HEY2	hes related family bHLH transcription factor with YRPW motif 2									ENOPH1	ENST00000273920.3	enolase-phosphatase 1	615
Details	1722	70	hsa-miR-190a-3p	F5	coagulation factor V									CTGF	ENST00000367976.3	connective tissue growth factor	10083
Details	1723	70	hsa-miR-190a-3p	UBASH3B	ubiquitin associated and SH3 domain containing B									EPHX4	ENST00000370383.4	epoxide hydrolase 4	55
Details	1724	70	hsa-miR-190a-3p	PGAP1	post-GPI attachment to proteins 1									UFM1	ENST00000239878.4	ubiquitin-fold modifier 1	1502
Details	1725	70	hsa-miR-190a-3p	CAST	calpastatin									NAA15	ENST00000296543.5	N(alpha)-acetyltransferase 15, NatA auxiliary subunit	546
Details	1726	70	hsa-miR-190a-3p	FABP2	fatty acid binding protein 2									CACNA1G	ENST00000352832.5	calcium channel, voltage-dependent, T type, alpha 1G subunit	11
Details	1727	70	hsa-miR-190a-3p	CD81	CD81 molecule									TSC22D2	ENST00000361875.3	TSC22 domain family, member 2	1062
Details	1728	70	hsa-miR-190a-3p	CELF4	CUGBP Elav-like family member 4									ZNF639	ENST00000326361.3	zinc finger protein 639	614
Details	1729	70	hsa-miR-190a-3p	DNTTIP2	deoxynucleotidyltransferase terminal interacting protein 2									CELF2	ENST00000379261.4	CUGBP, Elav-like family member 2	45
Details	1730	70	hsa-miR-190a-3p	ERCC6L	ERCC excision repair 6 like, spindle assembly checkpoint helicase									TCF24	ENST00000563496.1	transcription factor 24	11
Details	1731	70	hsa-miR-190a-3p	LCOR	ligand dependent nuclear receptor corepressor									ANO4	ENST00000392979.3	anoctamin 4	128
Details	1732	70	hsa-miR-190a-3p	NCOA4	nuclear receptor coactivator 4									EID1	ENST00000530028.2	EP300 interacting inhibitor of differentiation 1	6579
Details	1733	70	hsa-miR-190a-3p	IFIT2	interferon induced protein with tetratricopeptide repeats 2									AL953854.2	ENST00000438517.1		5
Details	1734	70	hsa-miR-190a-3p	IQCJ	IQ motif containing J									RXFP1	ENST00000307765.5	relaxin/insulin-like family peptide receptor 1	5
Details	1735	70	hsa-miR-190a-3p	KCMF1	potassium channel modulatory factor 1									HERPUD1	ENST00000379792.2	homocysteine-inducible, endoplasmic reticulum stress-inducible, ubiquitin-like domain member 1	804
Details	1736	70	hsa-miR-190a-3p	MDH1B	malate dehydrogenase 1B									MAGEC2	ENST00000247452.3	melanoma antigen family C, 2	5
Details	1737	70	hsa-miR-190a-3p	RAD54B	RAD54 homolog B									SMIM13	ENST00000416247.2	small integral membrane protein 13	199
Details	1738	69	hsa-miR-190a-3p	TUT4	terminal uridylyl transferase 4									CA5B	ENST00000454127.2	carbonic anhydrase VB, mitochondrial	245
Details	1739	69	hsa-miR-190a-3p	CKS2	CDC28 protein kinase regulatory subunit 2									ZBTB8B	ENST00000609129.1	zinc finger and BTB domain containing 8B	18
Details	1740	69	hsa-miR-190a-3p	AKAP9	A-kinase anchoring protein 9									ATP6AP2	ENST00000378438.4	ATPase, H+ transporting, lysosomal accessory protein 2	6001
Details	1741	69	hsa-miR-190a-3p	ZIC3	Zic family member 3									DCN	ENST00000456569.2	decorin	1280
Details	1742	69	hsa-miR-190a-3p	RER1	retention in endoplasmic reticulum sorting receptor 1									MTM1	ENST00000542741.1	myotubularin 1	68
Details	1743	69	hsa-miR-190a-3p	ITGA1	integrin subunit alpha 1									C12orf39	ENST00000256969.2	chromosome 12 open reading frame 39	65
Details	1744	69	hsa-miR-190a-3p	CNIH4	cornichon family AMPA receptor auxiliary protein 4									DNAJB12	ENST00000338820.3	DnaJ (Hsp40) homolog, subfamily B, member 12	1458
Details	1745	69	hsa-miR-190a-3p	SOX4	SRY-box 4									TGS1	ENST00000260129.5	trimethylguanosine synthase 1	662
Details	1746	69	hsa-miR-190a-3p	FUT4	fucosyltransferase 4									PGM2L1	ENST00000298198.4	phosphoglucomutase 2-like 1	183
Details	1747	69	hsa-miR-190a-3p	RAB11FIP4	RAB11 family interacting protein 4									KDSR	ENST00000406396.3	3-ketodihydrosphingosine reductase	322
Details	1748	69	hsa-miR-190a-3p	ZNF610	zinc finger protein 610									AGGF1	ENST00000312916.7	angiogenic factor with G patch and FHA domains 1	890
Details	1749	69	hsa-miR-190a-3p	B4GALT5	beta-1,4-galactosyltransferase 5									COG2	ENST00000366669.4	component of oligomeric golgi complex 2	276
Details	1750	69	hsa-miR-190a-3p	PDZRN4	PDZ domain containing ring finger 4									PABPC5	ENST00000312600.3	poly(A) binding protein, cytoplasmic 5	5
Details	1751	69	hsa-miR-190a-3p	SYT2	synaptotagmin 2									SLC4A10	ENST00000415876.2	solute carrier family 4, sodium bicarbonate transporter, member 10	5
Details	1752	69	hsa-miR-190a-3p	UNC5D	unc-5 netrin receptor D									RTN1	ENST00000395090.1	reticulon 1	80
Details	1753	69	hsa-miR-190a-3p	NCBP1	nuclear cap binding protein subunit 1									RPE	ENST00000429907.1	ribulose-5-phosphate-3-epimerase	333
Details	1754	69	hsa-miR-190a-3p	SNAP91	synaptosome associated protein 91									CENPL	ENST00000356198.2	centromere protein L	390
Details	1755	69	hsa-miR-190a-3p	MUC17	mucin 17, cell surface associated									VANGL2	ENST00000368061.2	VANGL planar cell polarity protein 2	560
Details	1756	69	hsa-miR-190a-3p	ZNF84	zinc finger protein 84									ADAM22	ENST00000398204.4	ADAM metallopeptidase domain 22	115
Details	1757	69	hsa-miR-190a-3p	DDX52	DExD-box helicase 52									ACVR2B	ENST00000352511.4	activin A receptor, type IIB	21
Details	1758	69	hsa-miR-190a-3p	USP11	ubiquitin specific peptidase 11									CCPG1	ENST00000310958.6	cell cycle progression 1	808
Details	1759	69	hsa-miR-190a-3p	GSE1	Gse1 coiled-coil protein									FBXL20	ENST00000394294.3	F-box and leucine-rich repeat protein 20	455
Details	1760	69	hsa-miR-190a-3p	CCDC148	coiled-coil domain containing 148									PPM1L	ENST00000498165.1	protein phosphatase, Mg2+/Mn2+ dependent, 1L	59
Details	1761	69	hsa-miR-190a-3p	EDN2	endothelin 2									LSM6	ENST00000502781.1	LSM6 homolog, U6 small nuclear RNA associated (S. cerevisiae)	660
Details	1762	69	hsa-miR-190a-3p	MANBA	mannosidase beta									CREB1	ENST00000432329.2	cAMP responsive element binding protein 1	295
Details	1763	69	hsa-miR-190a-3p	KIF5C	kinesin family member 5C									DR1	ENST00000370272.4	down-regulator of transcription 1, TBP-binding (negative cofactor 2)	2994
Details	1764	69	hsa-miR-190a-3p	CLDN14	claudin 14									EXOC8	ENST00000360394.2	exocyst complex component 8	129
Details	1765	69	hsa-miR-190a-3p	KIF3A	kinesin family member 3A									GXYLT1	ENST00000398675.3	glucoside xylosyltransferase 1	126
Details	1766	69	hsa-miR-190a-3p	RBMS2	RNA binding motif single stranded interacting protein 2									MTRR	ENST00000264668.2	5-methyltetrahydrofolate-homocysteine methyltransferase reductase	374
Details	1767	69	hsa-miR-190a-3p	JUN	Jun proto-oncogene, AP-1 transcription factor subunit									ZNF736	ENST00000423484.2	zinc finger protein 736	36
Details	1768	69	hsa-miR-190a-3p	RAB21	RAB21, member RAS oncogene family									BIVM	ENST00000448849.2	basic, immunoglobulin-like variable motif containing	440
Details	1769	69	hsa-miR-190a-3p	LPCAT2	lysophosphatidylcholine acyltransferase 2									MOXD1	ENST00000367963.3	monooxygenase, DBH-like 1	168
Details	1770	69	hsa-miR-190a-3p	GPX8	glutathione peroxidase 8 (putative)									NUPL2	ENST00000258742.5	nucleoporin like 2	1714
Details	1771	69	hsa-miR-190a-3p	RABGGTB	Rab geranylgeranyltransferase subunit beta									PARP9	ENST00000477522.2	poly (ADP-ribose) polymerase family, member 9	456
Details	1772	68	hsa-miR-190a-3p	MED12L	mediator complex subunit 12 like									ATXN1	ENST00000244769.4	ataxin 1	106
Details	1773	68	hsa-miR-190a-3p	ATXN7L1	ataxin 7 like 1									KAL1	ENST00000262648.3	Kallmann syndrome 1 sequence	11
Details	1774	68	hsa-miR-190a-3p	SPTBN1	spectrin beta, non-erythrocytic 1									USP8	ENST00000396444.3	ubiquitin specific peptidase 8	109
Details	1775	68	hsa-miR-190a-3p	SLC6A1	solute carrier family 6 member 1									PROX1	ENST00000366958.4	prospero homeobox 1	131
Details	1776	68	hsa-miR-190a-3p	CASTOR2	cytosolic arginine sensor for mTORC1 subunit 2									FKTN	ENST00000223528.2	fukutin	153
Details	1777	68	hsa-miR-190a-3p	TSHZ1	teashirt zinc finger homeobox 1									NFXL1	ENST00000381538.3	nuclear transcription factor, X-box binding-like 1	71
Details	1778	68	hsa-miR-190a-3p	PIFO	primary cilia formation									ACADSB	ENST00000358776.4	acyl-CoA dehydrogenase, short/branched chain	239
Details	1779	68	hsa-miR-190a-3p	RAB6D	RAB6D, member RAS oncogene family									SORT1	ENST00000256637.6	sortilin 1	2111
Details	1780	68	hsa-miR-190a-3p	MTF1	metal regulatory transcription factor 1									GPR15	ENST00000284311.3	G protein-coupled receptor 15	0
Details	1781	68	hsa-miR-190a-3p	CALCRL	calcitonin receptor like receptor									CCL28	ENST00000361115.4	chemokine (C-C motif) ligand 28	5
Details	1782	68	hsa-miR-190a-3p	CDK1	cyclin dependent kinase 1									FAM182B	ENST00000376403.1	family with sequence similarity 182, member B	9
Details	1783	68	hsa-miR-190a-3p	EVA1A	eva-1 homolog A, regulator of programmed cell death									TMEM38B	ENST00000374692.3	transmembrane protein 38B	755
Details	1784	68	hsa-miR-190a-3p	MED13L	mediator complex subunit 13 like									AC023590.1	ENST00000366457.2	Uncharacterized protein	5
Details	1785	68	hsa-miR-190a-3p	TMOD2	tropomodulin 2									KIAA2026	ENST00000399933.3	KIAA2026	712
Details	1786	68	hsa-miR-190a-3p	ZNF92	zinc finger protein 92									STOML3	ENST00000379631.4	stomatin (EPB72)-like 3	5
Details	1787	68	hsa-miR-190a-3p	IPO7	importin 7									DMC1	ENST00000216024.2	DNA meiotic recombinase 1	9
Details	1788	68	hsa-miR-190a-3p	ETNPPL	ethanolamine-phosphate phospho-lyase									ALS2CR11	ENST00000439802.1	amyotrophic lateral sclerosis 2 (juvenile) chromosome region, candidate 11	5
Details	1789	68	hsa-miR-190a-3p	NR3C1	nuclear receptor subfamily 3 group C member 1									RP11-10A14.4	ENST00000518496.1	Uncharacterized protein	9
Details	1790	68	hsa-miR-190a-3p	ELK4	ELK4, ETS transcription factor									NAA50	ENST00000240922.3	N(alpha)-acetyltransferase 50, NatE catalytic subunit	260
Details	1791	68	hsa-miR-190a-3p	SPDYE1	speedy/RINGO cell cycle regulator family member E1									KRIT1	ENST00000394507.1	KRIT1, ankyrin repeat containing	574
Details	1792	68	hsa-miR-190a-3p	KIAA1549	KIAA1549									ZNF100	ENST00000358296.6	zinc finger protein 100	142
Details	1793	68	hsa-miR-190a-3p	C1QTNF3	C1q and TNF related 3									G2E3	ENST00000206595.6	G2/M-phase specific E3 ubiquitin protein ligase	286
Details	1794	68	hsa-miR-190a-3p	SESTD1	SEC14 and spectrin domain containing 1									DTHD1	ENST00000456874.2	death domain containing 1	5
Details	1795	68	hsa-miR-190a-3p	ARHGEF19	Rho guanine nucleotide exchange factor 19									CPNE3	ENST00000198765.4	copine III	756
Details	1796	67	hsa-miR-190a-3p	RECK	reversion inducing cysteine rich protein with kazal motifs									SEPP1	ENST00000514985.1	selenoprotein P, plasma, 1	134
Details	1797	67	hsa-miR-190a-3p	FBXL16	F-box and leucine rich repeat protein 16									PARD6B	ENST00000371610.2	par-6 family cell polarity regulator beta	277
Details	1798	67	hsa-miR-190a-3p	DPF1	double PHD fingers 1									SHOC2	ENST00000369452.4	soc-2 suppressor of clear homolog (C. elegans)	437
Details	1799	67	hsa-miR-190a-3p	PTPN9	protein tyrosine phosphatase, non-receptor type 9									KDM5A	ENST00000399788.2	lysine (K)-specific demethylase 5A	118
Details	1800	67	hsa-miR-190a-3p	NFIX	nuclear factor I X									TMOD2	ENST00000249700.4	tropomodulin 2 (neuronal)	117
Details	1801	67	hsa-miR-190a-3p	PRR27	proline rich 27									DPP8	ENST00000341861.5	dipeptidyl-peptidase 8	1293
Details	1802	67	hsa-miR-190a-3p	ERCC6L2	ERCC excision repair 6 like 2									USP6NL	ENST00000609104.1	USP6 N-terminal like	183
Details	1803	67	hsa-miR-190a-3p	DAAM1	dishevelled associated activator of morphogenesis 1									USP37	ENST00000258399.3	ubiquitin specific peptidase 37	14
Details	1804	67	hsa-miR-190a-3p	WDR3	WD repeat domain 3									UEVLD	ENST00000541984.1	UEV and lactate/malate dehyrogenase domains	39
Details	1805	67	hsa-miR-190a-3p	AGL	amylo-alpha-1, 6-glucosidase, 4-alpha-glucanotransferase									DDX6	ENST00000264018.4	DEAD (Asp-Glu-Ala-Asp) box helicase 6	11
Details	1806	67	hsa-miR-190a-3p	ANKRD17	ankyrin repeat domain 17									FYB	ENST00000351578.6	FYN binding protein	5
Details	1807	67	hsa-miR-190a-3p	PPP4R3A	protein phosphatase 4 regulatory subunit 3A									TNS1	ENST00000171887.4	tensin 1	591
Details	1808	67	hsa-miR-190a-3p	APMAP	adipocyte plasma membrane associated protein									SIPA1L3	ENST00000222345.6	signal-induced proliferation-associated 1 like 3	1578
Details	1809	67	hsa-miR-190a-3p	ILDR1	immunoglobulin like domain containing receptor 1									NOTCH2NL	ENST00000369340.3	notch 2 N-terminal like	5
Details	1810	67	hsa-miR-190a-3p	ENY2	ENY2, transcription and export complex 2 subunit									OPRK1	ENST00000265572.3	opioid receptor, kappa 1	5
Details	1811	67	hsa-miR-190a-3p	ZCCHC8	zinc finger CCHC-type containing 8									SLC1A1	ENST00000262352.3	solute carrier family 1 (neuronal/epithelial high affinity glutamate transporter, system Xag), member 1	138
Details	1812	67	hsa-miR-190a-3p	LEPROT	leptin receptor overlapping transcript									DTX4	ENST00000227451.3	deltex homolog 4 (Drosophila)	5
Details	1813	67	hsa-miR-190a-3p	FBXO3	F-box protein 3									ASH1L	ENST00000368346.3	ash1 (absent, small, or homeotic)-like (Drosophila)	56
Details	1814	67	hsa-miR-190a-3p	SUN1	Sad1 and UNC84 domain containing 1									RUNX1T1	ENST00000523629.1	runt-related transcription factor 1; translocated to, 1 (cyclin D-related)	9
Details	1815	67	hsa-miR-190a-3p	CHRNA9	cholinergic receptor nicotinic alpha 9 subunit									RUNX2	ENST00000371432.3	runt-related transcription factor 2	105
Details	1816	67	hsa-miR-190a-3p	ZNF536	zinc finger protein 536									KCNJ10	ENST00000368089.3	potassium inwardly-rectifying channel, subfamily J, member 10	5
Details	1817	67	hsa-miR-190a-3p	CFLAR	CASP8 and FADD like apoptosis regulator									DGKB	ENST00000403951.2	diacylglycerol kinase, beta 90kDa	5
Details	1818	67	hsa-miR-190a-3p	ATG3	autophagy related 3									KCNJ15	ENST00000328656.4	potassium inwardly-rectifying channel, subfamily J, member 15	5
Details	1819	67	hsa-miR-190a-3p	ZBTB14	zinc finger and BTB domain containing 14									USP29	ENST00000254181.4	ubiquitin specific peptidase 29	5
Details	1820	67	hsa-miR-190a-3p	CD47	CD47 molecule									SLC5A1	ENST00000266088.4	solute carrier family 5 (sodium/glucose cotransporter), member 1	5
Details	1821	67	hsa-miR-190a-3p	RPS27L	ribosomal protein S27 like									IQCA1	ENST00000409907.3	IQ motif containing with AAA domain 1	21
Details	1822	67	hsa-miR-190a-3p	FAT3	FAT atypical cadherin 3									SNX27	ENST00000368843.3	sorting nexin family member 27	46
Details	1823	67	hsa-miR-190a-3p	PRKAA2	protein kinase AMP-activated catalytic subunit alpha 2									KBTBD6	ENST00000379485.1	kelch repeat and BTB (POZ) domain containing 6	51
Details	1824	67	hsa-miR-190a-3p	SLC44A1	solute carrier family 44 member 1									TET1	ENST00000373644.4	tet methylcytosine dioxygenase 1	5
Details	1825	67	hsa-miR-190a-3p	MAPK1IP1L	mitogen-activated protein kinase 1 interacting protein 1 like									USH2A	ENST00000307340.3	Usher syndrome 2A (autosomal recessive, mild)	5
Details	1826	67	hsa-miR-190a-3p	TRIM59	tripartite motif containing 59									SP4	ENST00000222584.3	Sp4 transcription factor	131
Details	1827	67	hsa-miR-190a-3p	SQLE	squalene epoxidase									PLD5	ENST00000536534.2	phospholipase D family, member 5	5
Details	1828	67	hsa-miR-190a-3p	DLL4	delta like canonical Notch ligand 4									BAZ2B	ENST00000392782.1	bromodomain adjacent to zinc finger domain, 2B	25
Details	1829	67	hsa-miR-190a-3p	SMIM13	small integral membrane protein 13									TRIM2	ENST00000338700.5	tripartite motif containing 2	22
Details	1830	67	hsa-miR-190a-3p	TEX14	testis expressed 14, intercellular bridge forming factor									LARP1	ENST00000336314.4	La ribonucleoprotein domain family, member 1	4979
Details	1831	67	hsa-miR-190a-3p	CLIP4	CAP-Gly domain containing linker protein family member 4									ZBTB43	ENST00000449886.1	zinc finger and BTB domain containing 43	396
Details	1832	66	hsa-miR-190a-3p	CELF2	CUGBP Elav-like family member 2									SLC7A14	ENST00000231706.5	solute carrier family 7, member 14	5
Details	1833	66	hsa-miR-190a-3p	RRM2B	ribonucleotide reductase regulatory TP53 inducible subunit M2B									PAPPA2	ENST00000367662.3	pappalysin 2	5
Details	1834	66	hsa-miR-190a-3p	ACAP2	ArfGAP with coiled-coil, ankyrin repeat and PH domains 2									CDH13	ENST00000566620.1	cadherin 13	1020
Details	1835	66	hsa-miR-190a-3p	SPRYD7	SPRY domain containing 7									ZKSCAN1	ENST00000324306.6	zinc finger with KRAB and SCAN domains 1	1314
Details	1836	66	hsa-miR-190a-3p	ELMSAN1	ELM2 and Myb/SANT domain containing 1									RP11-298I3.5	ENST00000555074.1		5
Details	1837	66	hsa-miR-190a-3p	IPP	intracisternal A particle-promoted polypeptide									SORCS3	ENST00000369701.3	sortilin-related VPS10 domain containing receptor 3	5
Details	1838	66	hsa-miR-190a-3p	ABCE1	ATP binding cassette subfamily E member 1									PLXNA1	ENST00000393409.2	plexin A1	189
Details	1839	66	hsa-miR-190a-3p	APIP	APAF1 interacting protein									SYT16	ENST00000430451.2	synaptotagmin XVI	5
Details	1840	66	hsa-miR-190a-3p	IL1R1	interleukin 1 receptor type 1									CNTN5	ENST00000524871.1	contactin 5	5
Details	1841	66	hsa-miR-190a-3p	ZNF117	zinc finger protein 117									ZNF512B	ENST00000369888.1	zinc finger protein 512B	8
Details	1842	66	hsa-miR-190a-3p	SCRN3	secernin 3									SRCIN1	ENST00000264659.7	SRC kinase signaling inhibitor 1	5
Details	1843	66	hsa-miR-190a-3p	PRND	prion like protein doppel									PLXNA2	ENST00000367033.3	plexin A2	8
Details	1844	66	hsa-miR-190a-3p	SLC12A2	solute carrier family 12 member 2									HLF	ENST00000226067.5	hepatic leukemia factor	15
Details	1845	66	hsa-miR-190a-3p	SLC35A1	solute carrier family 35 member A1									CYP1A2	ENST00000343932.4	cytochrome P450, family 1, subfamily A, polypeptide 2	5
Details	1846	66	hsa-miR-190a-3p	CREB5	cAMP responsive element binding protein 5									RSPH3	ENST00000367069.2	radial spoke 3 homolog (Chlamydomonas)	59
Details	1847	66	hsa-miR-190a-3p	LRPPRC	leucine rich pentatricopeptide repeat containing									ST8SIA3	ENST00000324000.3	ST8 alpha-N-acetyl-neuraminide alpha-2,8-sialyltransferase 3	5
Details	1848	66	hsa-miR-190a-3p	TSNAX	translin associated factor X									ST8SIA1	ENST00000396037.4	ST8 alpha-N-acetyl-neuraminide alpha-2,8-sialyltransferase 1	5
Details	1849	66	hsa-miR-190a-3p	RNF170	ring finger protein 170									PEG10	ENST00000482108.1	paternally expressed 10	8778
Details	1850	66	hsa-miR-190a-3p	GOLGA4	golgin A4									CXCR4	ENST00000409817.1	chemokine (C-X-C motif) receptor 4	14
Details	1851	66	hsa-miR-190a-3p	RERG	RAS like estrogen regulated growth inhibitor									SERPINE2	ENST00000409304.1	serpin peptidase inhibitor, clade E (nexin, plasminogen activator inhibitor type 1), member 2	1372
Details	1852	66	hsa-miR-190a-3p	NR4A2	nuclear receptor subfamily 4 group A member 2									AGFG1	ENST00000310078.8	ArfGAP with FG repeats 1	2019
Details	1853	66	hsa-miR-190a-3p	ZXDB	zinc finger X-linked duplicated B									NANP	ENST00000304788.3	N-acetylneuraminic acid phosphatase	78
Details	1854	66	hsa-miR-190a-3p	DOCK7	dedicator of cytokinesis 7									ZCCHC8	ENST00000536306.1	zinc finger, CCHC domain containing 8	297
Details	1855	66	hsa-miR-190a-3p	SRF	serum response factor									TRAF5	ENST00000261464.5	TNF receptor-associated factor 5	250
Details	1856	66	hsa-miR-190a-3p	EIF5A2	eukaryotic translation initiation factor 5A2									CEP128	ENST00000281129.3	centrosomal protein 128kDa	280
Details	1857	66	hsa-miR-190a-3p	MAFK	MAF bZIP transcription factor K									CPNE8	ENST00000331366.5	copine VIII	343
Details	1858	66	hsa-miR-190a-3p	ADGRF4	adhesion G protein-coupled receptor F4									ZBTB8A	ENST00000316459.4	zinc finger and BTB domain containing 8A	287
Details	1859	66	hsa-miR-190a-3p	SLC39A14	solute carrier family 39 member 14									ITCH	ENST00000374864.4	itchy E3 ubiquitin protein ligase	769
Details	1860	66	hsa-miR-190a-3p	VEGFC	vascular endothelial growth factor C									MAP2	ENST00000360351.4	microtubule-associated protein 2	68
Details	1861	66	hsa-miR-190a-3p	ITGAV	integrin subunit alpha V									RABGAP1L	ENST00000489615.1	RAB GTPase activating protein 1-like	364
Details	1862	66	hsa-miR-190a-3p	TET3	tet methylcytosine dioxygenase 3									PRLR	ENST00000342362.5	prolactin receptor	95
Details	1863	66	hsa-miR-190a-3p	DSC2	desmocollin 2									PET117	ENST00000432901.3	PET117 homolog (S. cerevisiae)	120
Details	1864	66	hsa-miR-190a-3p	VPS36	vacuolar protein sorting 36 homolog									FAM47E	ENST00000515604.1	Protein FAM47E	503
Details	1865	66	hsa-miR-190a-3p	ZNF506	zinc finger protein 506									NASP	ENST00000350030.3	nuclear autoantigenic sperm protein (histone-binding)	8
Details	1866	66	hsa-miR-190a-3p	EIF2S1	eukaryotic translation initiation factor 2 subunit alpha									PCF11	ENST00000298281.4	PCF11 cleavage and polyadenylation factor subunit	218
Details	1867	66	hsa-miR-190a-3p	FAM177A1	family with sequence similarity 177 member A1									CDH10	ENST00000264463.4	cadherin 10, type 2 (T2-cadherin)	5
Details	1868	65	hsa-miR-190a-3p	FAM3C	family with sequence similarity 3 member C									MYF6	ENST00000228641.3	myogenic factor 6 (herculin)	5
Details	1869	65	hsa-miR-190a-3p	CD200R1	CD200 receptor 1									NUGGC	ENST00000413272.2	nuclear GTPase, germinal center associated	10
Details	1870	65	hsa-miR-190a-3p	LRRIQ3	leucine rich repeats and IQ motif containing 3									SLC44A1	ENST00000374720.3	solute carrier family 44 (choline transporter), member 1	407
Details	1871	65	hsa-miR-190a-3p	SCD	stearoyl-CoA desaturase									PPIP5K1	ENST00000381885.1	diphosphoinositol pentakisphosphate kinase 1	109
Details	1872	65	hsa-miR-190a-3p	CUL3	cullin 3									PTPN1	ENST00000371621.3	protein tyrosine phosphatase, non-receptor type 1	142
Details	1873	65	hsa-miR-190a-3p	BBIP1	BBSome interacting protein 1									ACER3	ENST00000532485.1	alkaline ceramidase 3	295
Details	1874	65	hsa-miR-190a-3p	STEAP3	STEAP3 metalloreductase									ADCY3	ENST00000260600.5	adenylate cyclase 3	479
Details	1875	65	hsa-miR-190a-3p	AIP	aryl hydrocarbon receptor interacting protein									NDUFA5	ENST00000471770.1	NADH dehydrogenase (ubiquinone) 1 alpha subcomplex, 5	28
Details	1876	65	hsa-miR-190a-3p	CEP192	centrosomal protein 192									AFF3	ENST00000409236.2	AF4/FMR2 family, member 3	296
Details	1877	65	hsa-miR-190a-3p	RDH8	retinol dehydrogenase 8									PAPD5	ENST00000357464.3	PAP associated domain containing 5	152
Details	1878	65	hsa-miR-190a-3p	VEZT	vezatin, adherens junctions transmembrane protein									GNG10	ENST00000374293.4	guanine nucleotide binding protein (G protein), gamma 10	407
Details	1879	65	hsa-miR-190a-3p	FLT3LG	fms related tyrosine kinase 3 ligand									CCT4	ENST00000394440.3	chaperonin containing TCP1, subunit 4 (delta)	153
Details	1880	65	hsa-miR-190a-3p	PDZRN3	PDZ domain containing ring finger 3									PALM2	ENST00000448454.2	paralemmin 2	35
Details	1881	65	hsa-miR-190a-3p	ERCC4	ERCC excision repair 4, endonuclease catalytic subunit									DPYD	ENST00000370192.3	dihydropyrimidine dehydrogenase	160
Details	1882	65	hsa-miR-190a-3p	G2E3	G2/M-phase specific E3 ubiquitin protein ligase									ITGAV	ENST00000261023.3	integrin, alpha V	2407
Details	1883	65	hsa-miR-190a-3p	TAT	tyrosine aminotransferase									INHBA	ENST00000242208.4	inhibin, beta A	1260
Details	1884	65	hsa-miR-190a-3p	CWC15	CWC15 spliceosome associated protein homolog									EXOC5	ENST00000413566.2	exocyst complex component 5	242
Details	1885	65	hsa-miR-190a-3p	COPB1	coatomer protein complex subunit beta 1									NIT2	ENST00000394140.4	nitrilase family, member 2	133
Details	1886	65	hsa-miR-190a-3p	PARM1	prostate androgen-regulated mucin-like protein 1									DNAH10OS	ENST00000514254.2	dynein, axonemal, heavy chain 10 opposite strand	89
Details	1887	65	hsa-miR-190a-3p	DYNAP	dynactin associated protein									DUSP16	ENST00000298573.4	dual specificity phosphatase 16	444
Details	1888	65	hsa-miR-190a-3p	SPTY2D1	SPT2 chromatin protein domain containing 1									ETV1	ENST00000430479.1	ets variant 1	160
Details	1889	65	hsa-miR-190a-3p	AMOTL2	angiomotin like 2									ADAT2	ENST00000606514.1	adenosine deaminase, tRNA-specific 2	303
Details	1890	65	hsa-miR-190a-3p	KLHL28	kelch like family member 28									ERC1	ENST00000355446.5	ELKS/RAB6-interacting/CAST family member 1	159
Details	1891	65	hsa-miR-190a-3p	FSD1L	fibronectin type III and SPRY domain containing 1 like									LHFPL1	ENST00000371968.3	lipoma HMGIC fusion partner-like 1	5
Details	1892	65	hsa-miR-190a-3p	C14orf28	chromosome 14 open reading frame 28									STX11	ENST00000367568.4	syntaxin 11	13
Details	1893	65	hsa-miR-190a-3p	MYRF	myelin regulatory factor									TEX14	ENST00000389934.3	testis expressed 14	7
Details	1894	65	hsa-miR-190a-3p	TOX4	TOX high mobility group box family member 4									FAM208A	ENST00000493960.2	family with sequence similarity 208, member A	60
Details	1895	64	hsa-miR-190a-3p	KIAA1671	KIAA1671									NXT1	ENST00000254998.2	NTF2-like export factor 1	373
Details	1896	64	hsa-miR-190a-3p	STT3B	STT3B, catalytic subunit of the oligosaccharyltransferase complex									ELMO2	ENST00000290246.6	engulfment and cell motility 2	22
Details	1897	64	hsa-miR-190a-3p	PALM2	paralemmin 2									ACTBL2	ENST00000423391.1	actin, beta-like 2	9
Details	1898	64	hsa-miR-190a-3p	CTC1	CST telomere replication complex component 1									ELOVL5	ENST00000370918.4	ELOVL fatty acid elongase 5	2233
Details	1899	64	hsa-miR-190a-3p	TPTE	transmembrane phosphatase with tensin homology									MIB1	ENST00000261537.6	mindbomb E3 ubiquitin protein ligase 1	897
Details	1900	64	hsa-miR-190a-3p	GABPB2	GA binding protein transcription factor subunit beta 2									NHLRC2	ENST00000369301.3	NHL repeat containing 2	368
Details	1901	64	hsa-miR-190a-3p	CCDC186	coiled-coil domain containing 186									PCCB	ENST00000469217.1	propionyl CoA carboxylase, beta polypeptide	379
Details	1902	64	hsa-miR-190a-3p	UHRF1BP1L	UHRF1 binding protein 1 like									MLX	ENST00000435881.2	MLX, MAX dimerization protein	771
Details	1903	64	hsa-miR-190a-3p	ZNF626	zinc finger protein 626									FBLN2	ENST00000404922.3	fibulin 2	59
Details	1904	64	hsa-miR-190a-3p	ZZEF1	zinc finger ZZ-type and EF-hand domain containing 1									ZNF527	ENST00000587349.1	zinc finger protein 527	86
Details	1905	64	hsa-miR-190a-3p	RBM11	RNA binding motif protein 11									PIGL	ENST00000225609.5	phosphatidylinositol glycan anchor biosynthesis, class L	45
Details	1906	64	hsa-miR-190a-3p	SLC39A10	solute carrier family 39 member 10									TMEM132D	ENST00000389441.4	transmembrane protein 132D	5
Details	1907	64	hsa-miR-190a-3p	OSBPL8	oxysterol binding protein like 8									AL138847.1	ENST00000593719.1	CDNA FLJ26506 fis, clone KDN07105; Uncharacterized protein	5
Details	1908	64	hsa-miR-190a-3p	UHMK1	U2AF homology motif kinase 1									TMEM212	ENST00000334567.5	transmembrane protein 212	5
Details	1909	64	hsa-miR-190a-3p	ITGA4	integrin subunit alpha 4									TAF13	ENST00000338366.5	TAF13 RNA polymerase II, TATA box binding protein (TBP)-associated factor, 18kDa	745
Details	1910	64	hsa-miR-190a-3p	TMEM100	transmembrane protein 100									FECH	ENST00000262093.5	ferrochelatase	716
Details	1911	64	hsa-miR-190a-3p	FMR1	fragile X mental retardation 1									IL13	ENST00000304506.3	interleukin 13	5
Details	1912	64	hsa-miR-190a-3p	LRRC7	leucine rich repeat containing 7									KLHL32	ENST00000369261.4	kelch-like family member 32	11
Details	1913	64	hsa-miR-190a-3p	TECTB	tectorin beta									NUMBL	ENST00000252891.4	numb homolog (Drosophila)-like	323
Details	1914	64	hsa-miR-190a-3p	SUZ12	SUZ12, polycomb repressive complex 2 subunit									IKZF4	ENST00000262032.5	IKAROS family zinc finger 4 (Eos)	329
Details	1915	64	hsa-miR-190a-3p	MFAP3	microfibril associated protein 3									ZNF248	ENST00000395867.3	zinc finger protein 248	43
Details	1916	64	hsa-miR-190a-3p	OTULINL	OTU deubiquitinase with linear linkage specificity like									MFAP5	ENST00000359478.2	microfibrillar associated protein 5	216
Details	1917	64	hsa-miR-190a-3p	SLAIN2	SLAIN motif family member 2									SOS1	ENST00000426016.1	son of sevenless homolog 1 (Drosophila)	189
Details	1918	64	hsa-miR-190a-3p	CARMIL1	capping protein regulator and myosin 1 linker 1									ELAVL2	ENST00000380110.4	ELAV like neuron-specific RNA binding protein 2	78
Details	1919	64	hsa-miR-190a-3p	AGO3	argonaute RISC catalytic component 3									BCAT1	ENST00000261192.7	branched chain amino-acid transaminase 1, cytosolic	1346
Details	1920	64	hsa-miR-190a-3p	ATG10	autophagy related 10									ISCU	ENST00000338291.4	iron-sulfur cluster assembly enzyme	182
Details	1921	63	hsa-miR-190a-3p	GPR22	G protein-coupled receptor 22									SEL1L	ENST00000336735.4	sel-1 suppressor of lin-12-like (C. elegans)	1271
Details	1922	63	hsa-miR-190a-3p	MCM10	minichromosome maintenance 10 replication initiation factor									SLC16A7	ENST00000261187.4	solute carrier family 16 (monocarboxylate transporter), member 7	73
Details	1923	63	hsa-miR-190a-3p	GBP4	guanylate binding protein 4									KCTD16	ENST00000507359.3	potassium channel tetramerization domain containing 16	36
Details	1924	63	hsa-miR-190a-3p	TTN	titin									MTMR7	ENST00000180173.5	myotubularin related protein 7	33
Details	1925	63	hsa-miR-190a-3p	BTG2	BTG anti-proliferation factor 2									GLIPR1	ENST00000266659.3	GLI pathogenesis-related 1	623
Details	1926	63	hsa-miR-190a-3p	SLC6A15	solute carrier family 6 member 15									CBFB	ENST00000290858.6	core-binding factor, beta subunit	3904
Details	1927	63	hsa-miR-190a-3p	IMPAD1	inositol monophosphatase domain containing 1									PRPF38A	ENST00000257181.9	pre-mRNA processing factor 38A	892
Details	1928	63	hsa-miR-190a-3p	TAF1	TATA-box binding protein associated factor 1									TMEM100	ENST00000424486.2	transmembrane protein 100	86
Details	1929	63	hsa-miR-190a-3p	SPDYE3	speedy/RINGO cell cycle regulator family member E3									CEP152	ENST00000380950.2	centrosomal protein 152kDa	20
Details	1930	63	hsa-miR-190a-3p	CCDC173	coiled-coil domain containing 173									ZBTB1	ENST00000394712.2	zinc finger and BTB domain containing 1	920
Details	1931	63	hsa-miR-190a-3p	ERRFI1	ERBB receptor feedback inhibitor 1									MAP1LC3C	ENST00000357246.3	microtubule-associated protein 1 light chain 3 gamma	5
Details	1932	63	hsa-miR-190a-3p	WDR26	WD repeat domain 26									RAB21	ENST00000261263.3	RAB21, member RAS oncogene family	1823
Details	1933	63	hsa-miR-190a-3p	CCAR1	cell division cycle and apoptosis regulator 1									ZNF267	ENST00000300870.10	zinc finger protein 267	19
Details	1934	63	hsa-miR-190a-3p	ITPRIP	inositol 1,4,5-trisphosphate receptor interacting protein									DNAJC5B	ENST00000276570.5	DnaJ (Hsp40) homolog, subfamily C, member 5 beta	5
Details	1935	63	hsa-miR-190a-3p	KLHL4	kelch like family member 4									PITX2	ENST00000394595.3	paired-like homeodomain 2	75
Details	1936	63	hsa-miR-190a-3p	ANXA5	annexin A5									CNR1	ENST00000362094.5	cannabinoid receptor 1 (brain)	40
Details	1937	63	hsa-miR-190a-3p	SPN	sialophorin									SLITRK4	ENST00000381779.4	SLIT and NTRK-like family, member 4	86
Details	1938	63	hsa-miR-190a-3p	FAM241A	family with sequence similarity 241 member A									STAM2	ENST00000263904.4	signal transducing adaptor molecule (SH3 domain and ITAM motif) 2	296
Details	1939	63	hsa-miR-190a-3p	HSPBAP1	HSPB1 associated protein 1									HOOK3	ENST00000307602.4	hook microtubule-tethering protein 3	403
Details	1940	63	hsa-miR-190a-3p	FAM217A	family with sequence similarity 217 member A									DIAPH2	ENST00000324765.8	diaphanous-related formin 2	91
Details	1941	63	hsa-miR-190a-3p	CLMP	CXADR like membrane protein									SERPINB8	ENST00000397985.2	serpin peptidase inhibitor, clade B (ovalbumin), member 8	285
Details	1942	63	hsa-miR-190a-3p	ANGPT1	angiopoietin 1									SUPT20H	ENST00000360252.4	suppressor of Ty 20 homolog (S. cerevisiae)	53
Details	1943	63	hsa-miR-190a-3p	ZC3H7B	zinc finger CCCH-type containing 7B									ACSL6	ENST00000379264.2	acyl-CoA synthetase long-chain family member 6	7
Details	1944	63	hsa-miR-190a-3p	ANKS1A	ankyrin repeat and sterile alpha motif domain containing 1A									DNAJC22	ENST00000549441.2	DnaJ (Hsp40) homolog, subfamily C, member 22	84
Details	1945	63	hsa-miR-190a-3p	OPA3	OPA3, outer mitochondrial membrane lipid metabolism regulator									TUSC1	ENST00000358022.3	tumor suppressor candidate 1	987
Details	1946	63	hsa-miR-190a-3p	STBD1	starch binding domain 1									CANX	ENST00000247461.4	calnexin	17053
Details	1947	63	hsa-miR-190a-3p	EFNB2	ephrin B2									NOA1	ENST00000264230.4	nitric oxide associated 1	87
Details	1948	63	hsa-miR-190a-3p	MS4A2	membrane spanning 4-domains A2									CHIC1	ENST00000373504.6	cysteine-rich hydrophobic domain 1	16
Details	1949	63	hsa-miR-190a-3p	NFU1	NFU1 iron-sulfur cluster scaffold									VPS26A	ENST00000395098.1	vacuolar protein sorting 26 homolog A (S. pombe)	127
Details	1950	63	hsa-miR-190a-3p	IARS2	isoleucyl-tRNA synthetase 2, mitochondrial									ARHGAP39	ENST00000377307.2	Rho GTPase activating protein 39	14
Details	1951	63	hsa-miR-190a-3p	NFIA	nuclear factor I A									IQUB	ENST00000466202.1	IQ motif and ubiquitin domain containing	5
Details	1952	63	hsa-miR-190a-3p	SLC25A46	solute carrier family 25 member 46									SPDL1	ENST00000265295.4	spindle apparatus coiled-coil protein 1	427
Details	1953	63	hsa-miR-190a-3p	HLTF	helicase like transcription factor									ZNF624	ENST00000311331.7	zinc finger protein 624	167
Details	1954	63	hsa-miR-190a-3p	RPS6KA3	ribosomal protein S6 kinase A3									UBA3	ENST00000415609.2	ubiquitin-like modifier activating enzyme 3	96
Details	1955	63	hsa-miR-190a-3p	RGS9BP	regulator of G protein signaling 9 binding protein									FAM46D	ENST00000538312.1	family with sequence similarity 46, member D	5
Details	1956	63	hsa-miR-190a-3p	KLHL1	kelch like family member 1									ASAH2C	ENST00000426610.2	N-acylsphingosine amidohydrolase (non-lysosomal ceramidase) 2C	5
Details	1957	63	hsa-miR-190a-3p	USP53	ubiquitin specific peptidase 53									C1orf174	ENST00000361605.3	chromosome 1 open reading frame 174	10
Details	1958	63	hsa-miR-190a-3p	TAGAP	T cell activation RhoGTPase activating protein									ADIPOQ	ENST00000412955.2	adiponectin, C1Q and collagen domain containing	5
Details	1959	63	hsa-miR-190a-3p	C18orf21	chromosome 18 open reading frame 21									ETV3	ENST00000368192.4	ets variant 3	37
Details	1960	62	hsa-miR-190a-3p	HS3ST3A1	heparan sulfate-glucosamine 3-sulfotransferase 3A1									MDM4	ENST00000391947.2	Mdm4 p53 binding protein homolog (mouse)	443
Details	1961	62	hsa-miR-190a-3p	PRR11	proline rich 11									RPF2	ENST00000441448.2	ribosome production factor 2 homolog (S. cerevisiae)	869
Details	1962	62	hsa-miR-190a-3p	CBWD1	COBW domain containing 1									CEP104	ENST00000378230.3	centrosomal protein 104kDa	73
Details	1963	62	hsa-miR-190a-3p	PIGM	phosphatidylinositol glycan anchor biosynthesis class M									PDP1	ENST00000396200.3	pyruvate dehyrogenase phosphatase catalytic subunit 1	285
Details	1964	62	hsa-miR-190a-3p	CRIPT	CXXC repeat containing interactor of PDZ3 domain									LDLR	ENST00000558518.1	low density lipoprotein receptor	1462
Details	1965	62	hsa-miR-190a-3p	XPNPEP3	X-prolyl aminopeptidase 3									ACBD5	ENST00000396271.3	acyl-CoA binding domain containing 5	77
Details	1966	62	hsa-miR-190a-3p	RGCC	regulator of cell cycle									SERBP1	ENST00000370994.4	SERPINE1 mRNA binding protein 1	926
Details	1967	62	hsa-miR-190a-3p	SNRPD1	small nuclear ribonucleoprotein D1 polypeptide									JHDM1D	ENST00000397560.2	jumonji C domain containing histone demethylase 1 homolog D (S. cerevisiae)	470
Details	1968	62	hsa-miR-190a-3p	LOX	lysyl oxidase									ZC2HC1A	ENST00000263849.4	zinc finger, C2HC-type containing 1A	176
Details	1969	62	hsa-miR-190a-3p	SP3	Sp3 transcription factor									SNX16	ENST00000353788.4	sorting nexin 16	156
Details	1970	62	hsa-miR-190a-3p	UNC5C	unc-5 netrin receptor C									SCAPER	ENST00000538941.2	S-phase cyclin A-associated protein in the ER	60
Details	1971	62	hsa-miR-190a-3p	NDUFA5	NADH:ubiquinone oxidoreductase subunit A5									NIPBL	ENST00000448238.2	Nipped-B homolog (Drosophila)	250
Details	1972	62	hsa-miR-190a-3p	TNS1	tensin 1									CDC42EP3	ENST00000295324.3	CDC42 effector protein (Rho GTPase binding) 3	1749
Details	1973	62	hsa-miR-190a-3p	RERE	arginine-glutamic acid dipeptide repeats									BHLHE22	ENST00000321870.1	basic helix-loop-helix family, member e22	27
Details	1974	62	hsa-miR-190a-3p	ARMC10	armadillo repeat containing 10									ZNF274	ENST00000326804.4	zinc finger protein 274	113
Details	1975	62	hsa-miR-190a-3p	TMEM135	transmembrane protein 135									GNPDA2	ENST00000509756.1	glucosamine-6-phosphate deaminase 2	117
Details	1976	62	hsa-miR-190a-3p	BHLHE22	basic helix-loop-helix family member e22									CCDC170	ENST00000239374.7	coiled-coil domain containing 170	15
Details	1977	62	hsa-miR-190a-3p	UBR3	ubiquitin protein ligase E3 component n-recognin 3									ASPA	ENST00000263080.2	aspartoacylase	5
Details	1978	62	hsa-miR-190a-3p	MRGBP	MRG domain binding protein									ZNF366	ENST00000318442.5	zinc finger protein 366	5
Details	1979	62	hsa-miR-190a-3p	F3	coagulation factor III, tissue factor									MSTN	ENST00000260950.4	myostatin	6
Details	1980	62	hsa-miR-190a-3p	E2F5	E2F transcription factor 5									WNK3	ENST00000375169.3	WNK lysine deficient protein kinase 3	55
Details	1981	62	hsa-miR-190a-3p	ABCB5	ATP binding cassette subfamily B member 5									LAMA3	ENST00000313654.9	laminin, alpha 3	86
Details	1982	62	hsa-miR-190a-3p	HTR2A	5-hydroxytryptamine receptor 2A									LHX1	ENST00000254457.5	LIM homeobox 1	15
Details	1983	62	hsa-miR-190a-3p	HESX1	HESX homeobox 1									PRR23A	ENST00000383163.2	proline rich 23A	5
Details	1984	62	hsa-miR-190a-3p	TSPAN12	tetraspanin 12									FAP	ENST00000188790.4	fibroblast activation protein, alpha	618
Details	1985	62	hsa-miR-190a-3p	COL24A1	collagen type XXIV alpha 1 chain									RIPK2	ENST00000220751.4	receptor-interacting serine-threonine kinase 2	312
Details	1986	62	hsa-miR-190a-3p	PAFAH1B1	platelet activating factor acetylhydrolase 1b regulatory subunit 1									GPD1L	ENST00000282541.5	glycerol-3-phosphate dehydrogenase 1-like	130
Details	1987	62	hsa-miR-190a-3p	ULK4	unc-51 like kinase 4									RP11-766F14.2	ENST00000511828.1	Protein LOC285556	5
Details	1988	62	hsa-miR-190a-3p	SLC10A2	solute carrier family 10 member 2									CCDC80	ENST00000206423.3	coiled-coil domain containing 80	570
Details	1989	62	hsa-miR-190a-3p	SUPT7L	SPT7 like, STAGA complex gamma subunit									MARS2	ENST00000282276.6	methionyl-tRNA synthetase 2, mitochondrial	391
Details	1990	62	hsa-miR-190a-3p	CERS6	ceramide synthase 6									SRP9	ENST00000366838.1	signal recognition particle 9kDa	21
Details	1991	62	hsa-miR-190a-3p	ANGPTL5	angiopoietin like 5									ZNF268	ENST00000542986.2	zinc finger protein 268	156
Details	1992	62	hsa-miR-190a-3p	NUCKS1	nuclear casein kinase and cyclin dependent kinase substrate 1									ABCE1	ENST00000296577.4	ATP-binding cassette, sub-family E (OABP), member 1	787
Details	1993	62	hsa-miR-190a-3p	KIF27	kinesin family member 27									KIF18B	ENST00000587309.1	kinesin family member 18B	172
Details	1994	62	hsa-miR-190a-3p	TNRC6C	trinucleotide repeat containing 6C									FAM134B	ENST00000399793.2	family with sequence similarity 134, member B	102
Details	1995	62	hsa-miR-190a-3p	RSRC1	arginine and serine rich coiled-coil 1									CD38	ENST00000226279.3	CD38 molecule	23
Details	1996	62	hsa-miR-190a-3p	EYS	eyes shut homolog									SYNPO2	ENST00000429713.2	synaptopodin 2	105
Details	1997	62	hsa-miR-190a-3p	GLRA2	glycine receptor alpha 2									UBE2V2	ENST00000523111.2	ubiquitin-conjugating enzyme E2 variant 2	1770
[truncated: 4,084 more rows]
